# Supplementary material for: Distinct Genetic Architectures for Male and Female Inflorescence Traits of Maize
Source: PLoS Genet. 2011 Nov 17;7(11):e1002383. doi: 10.1371/journal.pgen.1002383 (PMC3219606; doi:10.1371/journal.pgen.1002383)
Supplement: Table S2 — GWAS SNPs. (XLS) [file pgen.1002383.s008.xls]

## Sheet: Sheet1
									Population
trait	chrom	cM	bp	allele	effect	p-value	RMIP	1	2	3	4	5	6	7	8	9	10	11	12	13	14	15	16	17	18	19	20	21	22	23	24	25	26
CL	1	-0.160963	1775373	C/A	1.20892	4.31e-09	9	1	1	0	0	0	1	0	1	1	0	1	0	0	1	1	0	1	0	1	0	1	1	1	1	1	0
CL	1	-0.160961	1775375	C/-	1.2156	2.63e-09	9	1	1	0	0	0	1	0	1	1	0	1	0	0	1	1	0	1	0	1	0	1	1	1	1	1	0
CL	1	0.119442	2076278	G/C	1.38002	1.22e-10	29	1	1	0	0	1	1	0	1	0	0	0	0	1	1	1	0	1	0	1	0	1	1	1	1	0	0
CD	1	0.768548	2772840	T/C	0.14389	3.68e-08	5	0	1	0	1	1	0	0	1	0	1	1	0	1	1	1	1	1	1	0	1	1	0	0	1	1	1
TL	1	0.775105	2779876	T/G	-5.71475	3.77e-09	10	0	0	0	0	0	0	0	0	0	0	0	1	0	0	0	0	0	1	0	0	0	0	0	0	1	0
TL	1	1.14512	2983256	T/C	-3.98463	5.15e-10	8	0	0	0	0	0	0	0	0	0	0	1	1	1	1	0	0	1	1	0	0	0	0	0	0	1	0
TL	1	1.20793	3001027	C/T	-3.61847	8.26e-10	9	0	0	0	1	0	0	0	0	1	0	1	0	0	1	0	1	0	1	0	1	0	0	0	0	1	0
TL	1	1.39197	3053100	G/A	6.5195	4.55e-08	6	0	1	0	0	0	0	0	1	0	0	0	0	0	0	0	0	0	0	0	0	0	0	0	0	0	0
CD	1	1.7313	3149111	C/T	0.171069	4.18e-08	7	0	1	1	1	0	0	0	1	0	1	0	1	1	1	0	0	1	0	1	0	1	0	1	0	1	0
TL	1	3.45921	3638006	G/T	-5.95852	1.76e-09	24	0	0	0	0	0	0	0	0	0	0	0	0	0	1	0	0	0	1	0	0	0	0	0	0	1	0
BZ	1	4.38968	4092556	---/CAC	-2.69539	1.36e-10	13	0	0	0	0	0	1	0	0	0	0	0	1	0	0	0	0	0	1	0	0	0	0	0	0	1	1
CD	1	4.80925	4327635	G/A	0.183923	1.43e-09	6	0	0	1	1	0	0	0	0	1	1	0	1	1	0	0	0	1	1	1	1	1	0	1	0	1	1
CD	1	4.81216	4329265	A/G	0.165936	2.43e-11	7	0	0	1	1	1	1	1	0	1	1	0	1	1	1	1	1	1	1	1	1	1	0	1	0	1	1
BZ	1	4.97669	4421452	-/G	-1.80327	1.69e-07	5	0	0	0	1	1	0	0	0	0	1	0	0	0	1	0	0	0	1	0	0	0	0	0	1	0	1
TL	1	4.98061	4423646	C/G	-5.17898	7.68e-08	6	0	0	0	0	0	0	0	0	0	0	0	1	0	0	0	1	0	1	0	0	0	0	0	0	0	0
BZ	1	4.98445	4425801	T/C	-1.49725	1.48e-08	5	0	0	0	1	1	1	1	0	0	0	0	1	1	1	0	0	1	1	0	1	1	0	0	0	1	0
CL	1	4.98705	4427258	T/A	2.13566	4.83e-08	5	0	1	0	0	0	0	0	0	0	0	0	0	1	0	1	0	0	0	1	0	0	0	0	0	0	0
CD	1	6.16946	4739839	A/C	0.195658	1.46e-14	9	1	1	1	1	1	1	1	0	1	1	0	1	1	1	1	1	1	0	1	0	0	0	1	0	1	1
CD	1	6.1697	4739895	T/C	0.205447	6.19e-08	8	0	0	0	0	1	0	0	0	1	1	0	0	1	1	1	0	1	0	0	0	0	0	1	0	0	1
BZ	1	7.12916	4963552	G/A	-2.39409	1.57e-08	19	0	0	0	1	1	1	0	0	0	0	0	1	0	0	0	0	0	1	0	0	0	0	0	0	0	0
CD	1	7.18238	4975957	G/A	0.190641	3.81e-14	6	0	1	1	1	1	1	1	1	1	1	0	1	1	0	1	0	1	0	1	1	1	0	1	1	0	1
CD	1	9.79607	5597940	C/T	0.212259	9.93e-17	6	0	0	1	1	1	1	0	1	1	1	0	1	1	1	0	1	0	0	0	1	1	0	1	1	1	1
CL	1	10.2708	5771415	C/G	-1.6962	4.66e-08	8	0	0	0	0	1	0	0	1	0	0	0	1	0	0	0	0	0	1	0	1	1	0	0	0	0	1
CL	1	11.4656	6208065	C/A	-2.3253	3.25e-07	6	0	0	0	0	0	0	0	0	0	0	0	0	0	0	0	1	0	1	0	0	0	0	0	0	0	1
CL	1	11.5155	6228237	A/G	-1.94599	2.25e-08	5	0	0	0	0	1	1	0	0	0	0	0	0	0	0	0	1	0	1	0	0	0	0	0	0	0	1
CL	1	12.066	6499282	--/CG	-1.80081	6.37e-08	8	0	0	0	0	0	1	0	0	0	0	0	0	0	1	0	1	0	1	0	1	1	0	0	0	0	0
CD	1	14.8601	7959274	C/T	0.152654	2.35e-09	5	1	1	1	1	1	1	0	0	1	1	0	1	1	1	1	1	1	1	1	0	1	1	1	1	0	1
CD	1	14.9082	7985717	G/A	0.18455	6.9e-13	8	0	1	1	1	1	1	0	1	1	1	0	1	1	0	1	1	1	1	0	1	1	0	1	0	1	1
CD	1	14.9368	8001468	C/T	0.208917	1.1e-12	19	0	1	1	1	0	1	0	1	1	1	0	1	1	0	1	0	0	1	0	0	1	0	1	0	1	1
CD	1	14.938	8002090	-----/GGGCG	0.22102	4.26e-21	7	1	1	1	1	1	1	0	0	1	1	1	1	1	0	1	1	1	1	1	0	1	0	1	0	1	1
CL	1	15.2824	8191569	-/T	2.76781	2.47e-09	5	0	1	0	0	0	0	0	0	0	0	0	0	0	0	0	0	0	0	1	0	0	0	1	0	0	0
CD	1	16.6742	8712931	T/C	0.145756	2.98e-09	13	1	1	1	1	1	1	1	1	1	1	0	1	1	1	1	1	0	1	1	0	1	1	1	1	1	1
BN	1	18.2337	9355255	A/-	0.216825	1.95e-08	6	1	1	0	0	1	0	1	1	0	0	1	0	0	0	0	1	0	0	1	0	0	0	0	1	1	0
BN	1	21.0176	10510141	C/G	0.210942	4.21e-09	7	1	1	0	0	1	0	1	0	0	0	1	1	1	0	0	1	0	0	1	0	1	0	0	1	1	0
BN	1	21.0276	10514964	G/-	0.717332	5.74e-15	45	0	0	0	0	0	0	0	0	0	0	0	0	0	0	0	0	0	1	0	0	0	0	0	0	1	0
BN	1	21.1186	10558745	A/G	0.28618	5.09e-10	32	1	1	0	0	0	0	1	0	0	0	1	0	0	0	0	0	0	1	1	0	1	0	0	1	1	0
ERN	1	24.4002	12208822	GATA/----	-0.210202	3.51e-09	5	0	0	0	0	0	0	1	0	0	1	1	0	0	1	0	0	0	0	0	0	0	0	0	0	0	0
BN	1	24.9813	12468625	G/A	0.678171	5.52e-13	49	0	0	0	0	0	0	0	0	0	0	0	0	0	0	0	0	0	1	0	0	0	0	0	0	1	0
BZ	1	27.472	13582337	A/C	-1.98811	2.74e-08	15	0	0	0	0	1	1	1	0	0	0	0	0	0	0	0	0	1	0	0	0	1	1	0	0	0	1
SL	1	29.8045	14745843	G/T	5.15747	1.93e-08	7	1	0	0	0	1	0	0	0	0	1	0	0	0	0	0	0	0	0	0	0	0	0	0	0	0	0
SL	1	29.834	14793137	-------/GGGGTGG	6.25746	9.94e-09	7	0	0	0	0	0	0	0	0	0	1	0	0	0	0	0	0	0	0	0	0	0	0	0	0	0	1
SL	1	29.878	14863576	----/TATT	-4.72668	5.16e-19	11	1	1	0	0	1	0	1	1	0	0	0	0	1	0	1	0	0	1	0	0	1	0	0	0	1	0
TL	1	29.878	14863576	----/TATT	-4.12642	7.44e-12	6	1	1	0	0	1	0	1	1	0	0	0	0	1	0	1	0	0	1	0	0	1	0	0	0	1	0
SL	1	30.2086	15040569	G/A	-5.00018	1.67e-18	5	0	1	0	0	0	0	1	0	0	0	0	0	1	0	0	1	0	0	0	0	1	1	0	0	1	0
TL	1	30.2087	15040629	T/A	-3.96562	5.26e-09	8	1	1	0	0	0	0	1	0	0	0	0	0	0	0	0	1	0	1	0	0	1	1	0	0	1	0
TL	1	30.2107	15041562	C/A	-4.34752	2.9e-11	12	1	1	0	0	0	0	1	0	0	0	0	0	0	0	0	1	0	1	0	0	1	1	0	0	1	0
SL	1	30.7046	15268504	T/-	-3.35045	3.88e-09	5	0	0	1	0	0	1	0	1	0	0	0	1	0	0	1	0	0	1	0	0	0	0	0	0	1	0
SL	1	31.1565	15476167	A/G	9.30522	3.76e-10	12	0	0	0	0	0	0	0	0	0	1	0	0	0	0	0	0	0	0	0	0	0	0	0	0	0	0
CD	1	32.2092	16018611	C/G	0.192186	1.43e-10	5	1	0	0	0	1	0	0	0	0	1	1	0	0	1	1	0	1	1	1	0	1	1	0	1	1	1
ERN	1	33.3895	16915952	C/G	0.205651	3.48e-21	79	0	1	0	0	1	1	0	1	0	0	0	0	1	1	0	0	1	0	1	1	0	1	0	1	0	1
ERN	1	33.3895	16915992	C/T	0.225847	2e-21	6	0	1	0	0	0	0	0	1	0	0	0	0	1	1	0	0	1	0	1	1	0	1	0	1	0	1
ERN	1	33.4087	16941481	T/C	0.221227	7.33e-13	10	0	1	0	0	0	0	0	0	0	0	0	0	0	0	0	0	1	0	1	1	0	0	0	1	0	1
CD	1	35.5256	19003020	-/T	-0.251574	1.9e-07	6	1	0	1	0	0	1	0	1	0	0	0	0	0	0	0	0	0	0	0	0	0	1	0	0	0	0
SL	1	35.5548	19034583	GTGCCAG/-------	-4.96169	1.24e-27	10	1	1	1	0	1	1	0	1	0	0	0	0	1	0	1	1	0	1	0	0	1	0	0	0	1	0
SL	1	36.0451	19563589	A/G	-3.46634	3.87e-19	41	1	1	1	1	1	0	1	1	1	0	1	0	1	0	1	1	0	1	0	1	1	0	0	0	1	1
TL	1	36.0451	19563589	A/G	-3.3588	1.12e-11	6	1	1	1	1	1	0	1	1	1	0	1	0	1	0	1	1	0	1	0	1	1	0	0	0	1	1
CD	1	36.104	19627207	C/T	0.240086	1.42e-12	7	1	0	0	0	0	0	0	0	0	0	1	1	0	1	0	0	1	1	1	0	0	0	1	1	0	1
ERN	1	36.2187	19750969	C/T	0.179855	2.47e-07	5	0	0	0	0	0	0	0	1	1	0	0	1	0	0	0	0	0	0	0	1	0	0	0	1	0	0
TL	1	38.1843	21683594	A/G	-6.76302	1.25e-17	17	0	1	0	1	0	0	0	0	0	0	0	0	0	0	0	0	0	1	0	0	1	0	0	0	1	0
BN	1	38.2141	21701093	C/A	0.539914	1.97e-09	39	0	0	0	0	0	0	1	0	0	0	0	0	0	0	0	0	0	0	0	0	0	0	0	0	1	0
TL	1	38.2282	21709403	A/G	13.057	2.22e-14	14	0	0	0	0	0	0	0	0	0	1	0	0	0	0	0	0	0	0	0	0	0	0	0	0	0	0
CD	1	38.2319	21711620	GA/--	-0.394263	1.38e-07	5	0	0	1	0	0	0	0	1	0	0	0	0	0	0	0	0	0	0	0	0	0	0	0	0	0	0
SL	1	39.3211	22410584	G/A	-8.52029	1.1e-08	8	0	0	0	0	0	0	0	0	0	0	0	0	0	0	0	0	0	0	0	0	0	0	0	0	1	0
TL	1	39.5404	22665178	C/T	8.71412	1.88e-12	9	0	0	0	0	0	1	0	0	0	1	0	0	0	0	0	0	0	0	0	0	0	0	0	0	0	0
TL	1	39.8768	23088238	G/A	-4.39524	3.46e-21	8	0	1	1	1	1	1	1	1	1	0	0	0	1	0	1	1	0	1	0	0	1	0	0	0	1	1
SL	1	39.8799	23091163	A/G	-4.34382	3.76e-23	5	0	1	1	1	1	1	0	0	1	0	0	0	1	0	1	1	0	1	0	0	1	0	0	0	1	0
SL	1	39.8857	23096728	T/A	-3.95259	1.21e-15	11	0	1	1	0	0	0	1	1	1	0	1	0	1	0	1	1	0	1	1	0	1	0	0	0	1	1
TL	1	39.9278	23137195	G/-	8.64514	1.39e-12	8	0	0	0	0	0	0	0	0	0	1	0	0	0	1	0	0	0	0	0	0	0	0	0	0	0	0
TL	1	40.0565	23260923	A/T	-5.30078	4.94e-28	5	0	1	1	1	1	1	1	1	1	0	0	0	0	0	1	1	0	1	0	0	1	0	0	0	1	1
TL	1	40.0568	23261237	--/GT	-5.61348	2.31e-23	28	0	1	0	1	1	1	1	1	0	0	0	0	0	0	0	1	0	0	0	0	1	0	0	0	1	1
TL	1	40.4765	23664721	T/A	-4.38703	7.04e-14	7	0	1	0	1	1	0	1	1	0	0	0	0	0	0	1	0	1	1	0	0	1	0	0	0	1	1
CD	1	40.6208	23803429	A/C	0.325964	7.68e-14	23	1	0	0	0	0	0	0	0	0	0	0	1	0	1	0	1	0	0	1	0	0	0	0	1	0	0
CD	1	40.6237	23806212	C/T	0.338417	1.76e-14	50	1	0	0	0	0	0	0	0	0	0	0	1	0	1	0	1	0	0	1	0	0	0	0	1	0	0
SL	1	41.7523	24891286	-----/GTCCA	4.54687	2.62e-13	6	0	0	0	0	0	0	1	1	0	1	1	0	0	0	0	0	1	0	1	0	0	0	0	1	0	1
BZ	1	42.5432	25651587	G/A	-2.14925	1.36e-14	12	1	1	1	1	1	0	1	0	1	0	0	1	0	0	1	0	0	0	1	0	1	0	0	1	0	0
TL	1	42.6164	25721914	G/-	9.16046	7.7e-14	18	0	0	0	0	0	0	0	0	0	1	0	0	0	1	0	0	0	0	0	0	0	0	0	0	0	0
TL	1	42.7687	25868413	G/A	7.02711	6.57e-12	6	0	0	1	0	0	0	0	0	0	1	0	0	0	1	0	0	0	0	0	0	0	0	0	0	0	0
BZ	1	43.0257	26115475	GTTTTGA/-------	3.13042	5.45e-09	12	0	0	0	0	0	0	0	0	0	1	0	0	0	1	0	0	0	0	1	0	0	0	0	0	0	0
CL	1	43.5217	26459030	--/GG	1.73012	4.56e-13	5	0	0	0	1	1	1	1	1	1	1	0	1	1	1	1	0	1	1	1	1	0	1	1	1	0	1
SL	1	43.9267	26680635	A/G	6.30107	5.07e-13	5	0	0	0	0	0	0	0	0	0	1	0	0	0	0	0	0	1	0	0	0	0	0	0	1	0	0
CL	1	44.1556	26805881	A/G	4.32074	1.72e-13	34	0	0	0	0	0	0	0	0	0	1	0	0	0	0	0	0	1	0	0	0	0	0	0	0	0	0
TL	1	44.5423	27017437	G/A	9.55667	5.44e-14	5	0	0	0	0	0	0	0	0	0	1	0	0	0	1	0	0	0	0	0	0	0	0	0	0	0	0
CL	1	44.5464	27019694	C/T	-3.3281	1.33e-40	95	1	1	1	1	1	1	1	1	1	0	0	0	1	0	1	0	0	1	0	1	1	0	0	0	1	1
CL	1	44.5473	27020183	-------/GTGGGGA	-2.73619	7.47e-28	5	0	0	1	0	0	1	1	1	1	0	0	0	1	0	1	0	0	0	0	1	1	0	0	0	1	1
BZ	1	44.5482	27020640	A/C	-1.99581	5.78e-17	9	1	1	1	1	0	1	1	1	1	0	0	1	0	0	1	0	0	1	0	1	1	0	0	1	1	1
ERN	1	45.7126	27657771	C/A	0.218605	2.59e-19	19	1	1	0	0	0	1	0	0	0	0	0	1	0	0	0	1	0	0	1	0	1	0	1	0	1	1
ERN	1	45.713	27657965	A/C	0.307659	1.63e-27	78	1	1	0	1	0	1	0	0	0	0	0	1	0	0	1	1	0	1	1	0	1	0	1	0	1	1
BZ	1	47.3426	28566024	A/C	-1.82904	2.48e-14	7	1	1	1	1	0	0	1	1	1	0	1	1	0	0	0	1	1	0	0	0	1	1	0	1	1	1
CL	1	47.4992	28711937	GGG/---	2.34893	1.27e-09	7	0	0	0	0	1	1	1	0	0	1	0	0	0	0	1	0	0	1	0	0	0	0	0	0	0	0
ERN	1	47.8801	29067090	A/-	-0.196236	1.33e-08	20	0	1	0	1	1	1	0	0	0	0	1	0	0	1	1	1	0	1	1	0	1	0	1	0	1	1
CL	1	48.1255	29295793	G/A	2.21412	1.11e-08	5	0	0	0	0	1	1	0	0	1	0	0	0	0	0	1	0	0	1	0	0	0	0	1	0	0	0
CD	1	48.1696	29336939	G/C	-0.255486	1.03e-07	6	0	0	1	0	0	1	1	1	0	0	0	0	1	0	0	0	0	0	0	0	0	0	0	0	0	0
SL	1	48.3077	29465652	G/C	6.15263	7.37e-12	7	0	0	0	0	0	0	0	0	0	1	0	0	0	1	0	0	0	0	0	0	0	0	0	1	0	0
SL	1	48.309	29466855	T/C	5.35992	5.38e-12	15	0	0	0	0	0	0	0	0	0	1	0	1	0	1	0	0	0	0	0	0	0	0	0	1	0	0
BZ	1	48.4972	29642309	----/TAGT	-2.11142	2.12e-13	46	1	1	0	1	0	0	0	0	0	0	1	1	0	0	1	1	0	1	0	0	1	0	0	1	1	0
BZ	1	48.4972	29642364	---/TGG	-2.01013	2.95e-13	6	1	0	1	1	0	0	1	1	0	0	1	1	0	0	1	0	0	1	0	0	1	0	0	1	0	1
CL	1	48.4975	29642626	----/ACAG	1.86784	1.14e-10	19	0	1	1	1	1	1	1	1	1	1	0	1	1	1	1	0	1	1	0	1	0	0	1	0	0	1
ERN	1	49.415	30497891	A/T	-0.141895	1.34e-08	23	0	1	0	0	1	1	1	1	0	1	1	1	1	1	1	1	1	1	1	0	1	0	1	0	1	1
SL	1	49.6684	30734161	G/C	4.57397	4.6e-14	9	0	0	0	0	0	0	1	0	0	1	1	0	0	1	0	0	0	0	0	1	0	0	0	1	0	1
ERN	1	51.8974	32786638	A/G	-0.279881	4.07e-10	27	0	0	0	0	0	0	0	0	0	1	1	0	1	0	0	0	0	0	0	0	0	0	0	0	0	0
BZ	1	52.5992	33350636	TCCCC/-----	-1.96935	6.97e-12	7	1	1	0	0	1	0	1	1	0	0	0	1	0	0	1	0	1	1	0	0	1	0	0	1	0	0
CD	1	54.4631	35241666	A/G	-0.340034	9.93e-09	15	0	0	1	0	0	0	0	1	0	0	0	0	1	0	0	0	0	0	0	0	0	0	0	0	0	0
CL	1	55.6475	37199195	A/T	3.50366	4.54e-09	5	0	0	0	0	0	0	0	0	0	1	0	0	0	0	0	0	0	0	0	0	0	1	0	0	0	0
CL	1	56.8213	38920280	A/G	2.92368	1.13e-12	40	0	0	0	0	0	0	0	0	0	1	0	0	0	0	0	0	1	0	0	0	0	1	0	1	0	0
BN	1	62.7727	46971538	A/T	-0.293676	1.24e-19	26	1	1	0	1	1	0	0	1	1	0	1	1	0	0	0	0	1	0	1	1	1	0	1	1	0	1
BN	1	62.7843	46989069	C/T	-0.261919	1.24e-21	23	1	0	0	1	1	1	0	1	1	1	1	1	0	1	1	1	1	1	1	1	1	0	1	1	1	1
BN	1	63.9877	48813972	G/A	-0.265764	2.39e-18	6	1	0	1	1	0	1	0	1	0	1	1	1	1	0	0	1	1	0	1	1	0	1	1	1	1	0
BN	1	64.1115	49001655	G/A	-0.266766	4.03e-21	8	1	0	1	1	1	1	0	0	0	1	1	1	1	1	0	0	1	1	1	1	1	1	1	1	1	1
BN	1	64.1375	49041186	-----/CGTGC	-0.246492	9.81e-19	16	1	0	0	1	1	1	0	1	1	1	1	1	0	1	0	1	1	1	1	0	1	1	1	1	1	1
TL	1	64.2518	49214536	G/A	6.87109	4.97e-11	10	0	0	0	0	0	0	0	0	0	1	0	0	0	0	0	1	0	1	0	0	0	0	0	0	0	0
BN	1	64.7114	49911426	G/C	-0.256547	3.5e-20	6	1	0	1	1	1	1	0	1	0	1	1	1	0	1	1	1	1	0	1	1	1	1	1	1	1	1
SL	1	65.4717	51062007	-/A	6.34369	1.65e-09	5	0	0	0	0	0	0	0	0	0	1	0	0	0	0	0	0	0	0	0	1	0	0	0	0	0	0
TL	1	65.9968	51513823	G/C	4.31996	7.03e-11	11	0	0	0	1	0	1	0	0	0	1	0	0	0	0	0	1	1	0	1	0	1	0	0	0	0	0
TL	1	65.997	51513884	C/A	5.34725	5.43e-12	19	0	0	0	1	0	0	0	0	0	1	0	0	0	0	0	1	1	0	1	0	0	0	0	0	0	0
SL	1	66.0542	51559244	-----/CATTG	5.5742	1.84e-41	80	0	0	1	1	0	1	0	1	0	1	1	1	1	0	1	0	1	1	1	0	0	0	1	1	0	1
TL	1	66.0542	51559244	-----/CATTG	4.87929	1.97e-16	28	0	0	1	1	0	1	0	1	0	1	1	1	1	0	1	0	1	1	1	0	0	0	1	1	0	1
SL	1	66.0723	51574102	G/A	5.1014	4.68e-17	8	0	0	1	0	0	1	0	0	0	1	1	1	0	0	0	0	0	1	1	0	0	0	1	1	0	0
ERN	1	66.4071	51847808	A/G	-0.119776	1.05e-11	15	0	1	1	1	1	1	1	1	1	1	1	1	1	0	1	0	1	0	0	1	1	0	1	1	1	1
ERN	1	66.8104	52177481	A/C	-0.134678	7.37e-11	13	0	0	1	1	1	1	1	0	0	1	1	0	1	0	1	0	1	0	0	0	1	0	1	0	1	1
SL	1	66.8117	52178544	T/G	5.63089	1.09e-20	14	0	0	0	0	1	0	0	1	0	1	1	1	0	0	0	0	0	0	0	0	0	0	1	1	0	1
TL	1	66.8117	52178544	T/G	6.67312	5.25e-26	80	0	0	0	0	1	0	0	1	0	1	1	1	0	0	0	0	0	0	0	0	0	0	1	1	0	1
ERN	1	67.093	52408574	A/G	-0.165549	4.62e-14	5	0	1	1	0	0	1	1	0	0	1	1	1	1	0	0	0	1	0	0	1	1	0	0	0	1	0
ERN	1	67.933	53095315	A/T	-0.168592	1e-13	51	0	1	1	1	1	0	0	0	1	1	1	0	1	0	0	0	0	0	0	1	1	0	1	0	1	0
SL	1	68.4341	53504939	C/T	2.9769	1.57e-09	6	0	0	0	1	1	1	0	1	0	1	1	0	0	1	0	1	0	0	0	1	0	1	1	1	0	1
CL	1	69.1914	54391888	----/TTAA	3.12387	1.16e-14	22	0	0	0	0	0	0	0	0	0	1	0	0	1	0	0	0	0	0	0	0	0	1	0	1	0	0
CL	1	69.3617	55030445	A/C	3.20439	8.86e-16	10	0	0	0	0	0	0	0	0	0	1	0	0	0	0	0	0	1	0	0	0	0	1	0	1	0	0
CL	1	69.3994	55171793	T/G	3.0849	6.88e-15	9	0	0	0	0	0	0	0	0	0	1	0	0	0	0	0	0	1	0	0	0	0	1	0	1	0	0
CD	1	71.2426	58712750	T/G	-0.506299	4.48e-12	6	0	0	0	0	0	0	0	0	0	1	1	0	0	0	0	0	0	0	0	0	0	0	0	0	0	0
CD	1	72.6703	61783224	G/C	0.408526	2.43e-18	35	1	0	0	0	0	0	0	0	0	0	0	1	0	1	0	1	1	0	0	0	0	0	0	0	0	0
BZ	1	72.8312	62327636	T/C	-2.819	1.04e-08	13	0	1	0	0	0	0	0	1	0	0	0	0	0	0	0	0	0	1	0	0	0	0	0	0	1	0
BZ	1	72.8992	62557722	G/T	-3.27906	6.89e-09	7	0	1	0	0	0	0	0	0	0	0	0	0	0	0	0	0	0	1	0	0	0	0	0	0	1	0
CD	1	74.5958	65683045	A/G	-0.264299	9.92e-14	9	0	0	1	0	0	1	1	0	0	1	1	0	0	0	0	0	1	1	1	0	1	0	0	0	1	0
CD	1	75.1731	66755870	G/C	0.427993	1.53e-18	37	1	0	0	0	0	1	1	0	0	0	0	0	0	1	0	1	0	0	0	0	0	0	0	0	0	0
CD	1	76.1868	68749893	G/A	-0.447674	3.68e-20	37	0	0	0	0	0	0	0	0	0	1	1	0	0	0	0	0	1	1	1	0	0	0	0	0	0	0
CD	1	76.6061	69574706	C/G	-0.660065	3.02e-16	7	0	0	0	0	0	0	0	0	0	0	1	0	0	0	0	0	1	0	0	0	0	0	0	0	0	0
CD	1	77.9346	72187837	-----/GTATT	-0.352765	9.59e-15	12	0	1	0	0	0	0	0	0	0	1	1	0	0	0	0	0	1	1	0	1	0	0	0	0	0	0
BZ	1	82.6198	83384515	T/C	1.99392	6.94e-11	7	0	0	0	1	1	0	1	1	0	1	0	1	0	0	0	1	0	1	0	0	0	0	1	0	0	1
BZ	1	83.0879	85130756	C/G	1.79808	8.92e-13	6	0	0	1	0	1	1	1	1	1	1	0	1	1	1	0	1	0	1	1	1	1	0	1	0	0	1
BZ	1	83.6383	87184598	C/T	2.16226	4.61e-14	51	0	0	1	1	1	0	1	0	1	1	0	0	0	1	0	1	0	0	1	0	1	0	1	0	0	0
SL	1	86.1812	94090681	G/A	-3.92023	2.88e-20	20	0	1	1	1	1	1	1	1	1	0	0	0	1	1	1	0	1	0	1	0	0	0	0	0	1	1
BN	1	87.4332	97628350	A/G	0.28602	1.02e-09	34	0	1	0	1	1	0	0	0	0	0	1	1	0	0	0	0	0	0	0	1	1	0	0	0	0	0
SL	1	87.4696	97924009	G/A	-3.50967	9.55e-19	7	0	1	0	1	0	0	1	1	1	0	1	1	1	0	1	1	1	0	1	0	1	1	0	0	1	1
CL	1	87.5839	98852974	A/C	-1.51493	4.88e-09	6	0	0	1	0	0	0	1	1	0	0	1	0	0	1	1	0	0	0	1	0	1	0	0	0	1	1
CL	1	87.8933	101366717	T/C	-1.4286	1.57e-09	6	0	0	1	1	1	0	1	1	0	0	0	1	0	1	1	0	1	0	1	0	0	0	0	0	1	1
TL	1	88.027	102256940	G/C	-3.93018	4.04e-11	8	1	0	0	0	1	0	1	0	0	0	1	0	0	0	0	1	1	0	0	0	0	1	0	0	1	1
TL	1	88.1202	102869858	G/A	-6.39575	1.14e-10	19	0	0	0	0	0	0	1	1	0	0	0	0	0	0	0	0	1	0	0	0	0	0	0	0	0	0
TL	1	88.1326	102951618	G/T	-5.23126	1.83e-11	7	1	1	0	0	0	0	0	1	0	0	0	0	0	0	1	0	1	0	0	0	0	0	0	0	0	0
SL	1	88.1494	103062257	G/A	-5.3488	2.27e-12	11	0	1	0	0	0	0	0	1	0	0	0	0	0	0	0	0	1	0	1	0	0	0	0	0	0	0
TL	1	89.2603	118069229	G/A	-6.01786	6.99e-10	5	1	0	0	0	0	0	0	1	0	0	0	0	0	0	0	0	1	0	0	0	0	0	0	0	0	0
BN	1	89.2671	118231281	G/A	0.282118	5.56e-09	18	0	0	0	1	1	0	0	0	0	0	0	0	0	1	0	0	0	0	1	1	1	0	0	0	0	1
BN	1	89.3549	124414991	G/A	0.450714	9.81e-11	7	0	1	0	1	1	0	0	0	0	0	0	0	0	0	0	0	0	0	0	0	0	0	0	0	0	0
SL	1	89.3704	125944013	A/G	-3.97975	5.81e-15	43	0	0	0	1	0	0	1	1	0	0	0	0	1	1	0	0	1	0	1	0	1	0	1	0	0	0
TL	1	89.4194	130757471	C/T	-6.03418	2.11e-09	6	0	0	0	0	0	0	1	0	0	0	0	0	0	0	0	1	1	0	0	0	0	0	0	0	0	0
CD	1	91.097	158866330	G/T	0.379266	1.53e-09	6	1	0	0	0	0	0	0	0	0	0	0	1	0	1	0	0	0	0	0	0	0	0	0	0	0	0
BZ	1	91.6869	163691655	A/T	1.64698	9.35e-12	6	0	0	1	0	1	0	1	1	0	1	1	1	0	1	0	1	0	0	1	1	1	0	1	1	1	1
BZ	1	91.9307	165917816	A/G	2.20796	1.85e-12	5	0	1	0	0	1	0	0	0	1	0	1	1	0	1	0	0	0	1	1	0	0	0	0	0	1	1
BZ	1	92.0349	166657860	C/G	2.23496	2.04e-15	13	0	0	1	0	1	0	1	0	0	1	0	1	0	1	0	1	0	0	0	0	0	0	1	1	1	1
TL	1	95.311	176621388	---/GGA	5.58526	4.4e-12	7	0	0	0	0	0	0	0	0	0	1	0	1	0	0	0	1	0	1	0	0	0	0	0	1	0	0
ERN	1	95.6817	177628811	G/A	0.092483	3.05e-09	20	1	1	1	1	1	1	1	1	0	1	1	1	0	1	1	1	1	1	1	1	1	1	1	1	1	1
ERN	1	95.9402	178331029	G/A	0.09718	3.23e-09	6	1	1	1	1	1	0	1	1	1	1	1	0	0	1	1	1	1	1	1	1	1	1	1	1	0	1
ERN	1	96.0359	178591171	G/A	0.119977	7.84e-11	5	1	0	1	1	1	0	1	1	0	1	1	0	0	1	0	0	0	1	1	1	1	0	1	1	1	1
ERN	1	96.3518	179449530	C/-	0.0954005	4.98e-10	5	1	1	1	1	1	1	1	1	0	1	1	1	1	1	1	1	1	1	1	1	1	1	1	1	1	1
BZ	1	96.4599	179743339	A/G	3.29638	6.5e-10	7	0	0	0	0	1	0	0	0	0	0	1	0	0	0	0	0	0	0	0	0	0	0	0	0	1	0
BZ	1	97.6144	182205805	T/C	2.56418	2.45e-11	32	0	0	0	0	1	0	0	1	0	1	1	1	0	0	0	0	0	0	0	0	0	0	0	0	1	0
TL	1	97.7644	182502777	G/A	3.85388	1.32e-11	5	1	0	1	0	1	0	0	0	0	1	0	1	0	0	0	1	0	1	0	0	1	0	0	0	1	0
TL	1	99.2547	183972508	GCC/---	4.62602	1.59e-13	5	0	0	0	1	0	1	0	0	1	1	0	1	1	0	0	0	0	1	0	0	0	0	0	0	1	0
SL	1	99.8328	184752875	------/GATAAC	3.87778	6.93e-09	12	0	0	1	0	0	0	0	0	0	0	0	1	0	0	0	1	1	0	0	0	0	0	0	0	1	0
BN	1	99.8334	184753591	G/T	0.273762	1.86e-08	6	0	0	0	1	1	0	0	0	0	0	1	0	0	0	0	0	0	0	1	1	1	0	0	1	0	0
BZ	1	100.529	185619922	A/G	3.08864	2.9e-12	23	0	0	1	0	0	0	0	0	0	1	0	0	0	1	0	1	0	0	0	0	0	0	0	0	1	0
BZ	1	101.598	186951467	G/A	3.71478	4.52e-13	16	0	0	0	0	0	0	1	0	0	1	0	0	0	0	0	1	0	0	0	0	0	0	0	0	1	0
CL	1	102.348	187886183	G/C	-3.48359	1.09e-12	10	0	0	1	0	0	0	0	0	0	0	0	0	0	0	0	0	0	0	1	0	0	0	0	0	0	1
BZ	1	102.351	187890185	G/A	4.67443	6.75e-11	7	0	0	0	0	0	0	0	0	0	0	0	0	0	0	0	1	0	0	0	0	0	0	0	0	1	0
BZ	1	102.377	187921755	G/A	3.8283	1.47e-11	5	0	0	0	0	0	0	0	0	0	0	0	1	0	0	0	1	0	0	0	0	0	0	0	0	1	0
TL	1	102.377	187921755	G/A	7.26431	8.78e-12	8	0	0	0	0	0	0	0	0	0	0	0	1	0	0	0	1	0	0	0	0	0	0	0	0	1	0
TL	1	102.414	187968715	A/-	4.22582	3.02e-11	5	0	1	1	0	0	1	0	0	0	1	0	1	1	0	0	1	0	1	0	0	0	0	0	0	0	0
TL	1	103.799	189693542	T/C	4.30575	4.92e-12	29	0	0	1	0	1	0	0	0	0	0	1	1	0	0	0	1	1	1	0	0	0	0	0	1	1	0
CL	1	104.477	190537710	-----/GCGGT	-1.54697	1.02e-09	5	1	0	0	0	0	0	1	0	1	0	0	1	0	1	0	1	1	1	1	0	1	0	0	0	1	1
SL	1	105.103	191318751	-/C	2.61629	4.2e-11	5	1	1	1	1	1	1	0	1	1	1	0	1	0	1	1	1	1	0	1	0	0	1	0	1	1	1
CL	1	105.162	191391505	G/T	-3.18589	1.63e-14	13	0	0	0	0	0	0	0	0	0	0	1	0	0	1	0	0	0	0	1	0	0	0	0	0	0	1
SL	1	105.214	191456593	G/A	4.85842	4.9e-10	11	0	0	1	0	0	0	0	0	0	0	0	1	0	0	0	1	0	0	0	0	0	0	0	1	0	0
TL	1	105.215	191457638	A/T	5.50866	1.08e-09	8	0	0	0	0	0	0	0	0	0	1	0	0	0	0	0	1	0	0	0	0	0	0	0	1	1	0
BN	1	105.248	191498370	C/A	0.648883	5.04e-18	36	0	0	0	0	0	0	1	0	0	1	0	0	0	0	0	0	0	0	0	0	0	0	0	0	1	0
CL	1	105.439	191736540	G/A	-1.74069	3.5e-16	40	0	0	1	0	1	1	1	1	0	0	1	1	0	1	0	1	1	1	1	0	1	0	1	1	0	1
BZ	1	105.517	191834335	CTCCA/-----	4.1886	7.32e-09	5	0	0	0	0	0	0	0	0	0	0	0	0	0	0	0	1	0	0	0	0	0	0	0	0	1	0
CD	1	105.518	191834853	---/ATG	0.439744	4.89e-12	11	0	0	0	0	1	0	0	0	0	0	0	1	0	0	1	0	0	0	0	0	0	0	0	0	0	0
CD	1	105.53	191849447	TA/--	0.35884	9.3e-11	7	0	0	0	0	0	1	0	0	0	0	0	1	0	0	1	0	0	0	0	0	0	0	0	0	1	0
BN	1	106.453	193000352	G/A	0.644471	3.51e-18	61	0	0	0	0	0	0	1	0	0	1	0	0	0	0	0	0	0	0	0	0	0	0	0	0	1	0
CL	1	107.42	194204621	A/C	-3.15434	2.8e-14	6	0	0	1	0	0	0	1	0	0	0	0	0	0	1	0	0	0	0	0	0	0	0	0	0	0	1
BN	1	107.679	194527168	C/G	-0.71219	4.32e-16	83	0	0	0	0	0	0	0	0	0	0	0	0	0	0	0	0	0	0	0	1	0	0	0	0	0	1
CL	1	107.699	194551950	A/G	-2.7441	7.05e-09	6	0	0	0	0	0	0	0	0	0	0	0	0	0	0	0	0	1	0	1	0	1	0	0	0	0	0
CL	1	109.02	196046122	T/G	-2.64822	1e-10	9	0	0	1	0	1	0	0	0	0	0	0	0	0	0	0	0	0	0	1	0	0	0	0	0	0	1
CD	1	109.519	196546297	G/A	-0.243604	3.28e-09	11	0	1	0	1	0	0	0	0	1	0	0	0	0	0	0	1	0	0	0	1	1	0	0	0	0	0
CD	1	110.114	197111192	G/A	-0.281974	7.04e-12	15	0	1	1	0	0	0	0	0	1	0	0	0	0	0	0	1	0	0	0	1	1	0	0	0	0	0
CL	1	110.265	197240442	C/T	-2.71712	2.91e-11	10	0	0	1	0	0	0	0	1	0	0	0	0	0	0	0	0	0	0	1	0	0	0	0	0	0	1
CD	1	110.561	197494559	C/T	-0.26178	4.09e-11	8	0	0	0	1	0	0	0	1	0	0	0	0	0	0	0	1	0	0	0	1	1	1	0	0	0	1
CD	1	112.285	198970768	G/A	-0.213442	2.1e-10	6	0	0	1	1	0	1	0	1	1	0	0	0	1	0	0	1	0	0	0	1	1	0	0	0	0	1
CD	1	113.273	199816964	G/-	0.347126	9.79e-09	7	0	0	0	0	1	0	0	0	0	0	0	1	0	0	0	0	0	0	0	0	0	0	0	0	1	0
CD	1	113.48	199993873	A/G	-0.245523	2.87e-11	9	0	0	1	1	0	0	0	1	0	0	0	0	0	1	0	0	0	0	0	1	1	1	0	0	0	1
ERN	1	114.103	200527350	A/C	-0.265889	1.68e-17	11	0	0	0	0	0	0	1	0	0	0	1	0	0	1	0	0	0	0	0	1	1	1	0	0	0	0
ERN	1	115.855	202535331	C/T	0.295031	1.9e-19	97	0	0	0	0	0	1	1	0	0	0	0	1	0	0	0	1	0	0	0	0	0	0	0	0	0	1
CD	1	116.47	203952456	G/A	0.243171	1.37e-07	5	0	0	0	0	1	1	0	0	0	0	0	1	0	0	0	0	0	0	0	0	0	0	0	0	1	1
ERN	1	117.795	205543954	--/AG	-0.304929	3.72e-19	58	0	0	0	0	0	0	0	0	0	0	1	0	0	0	0	1	0	0	0	1	1	1	0	0	0	0
ERN	1	118.757	206542286	T/G	-0.316145	1.31e-16	24	0	0	0	0	0	0	0	0	0	0	1	0	0	0	0	0	1	0	0	1	1	0	0	0	0	0
BN	1	120.465	208342701	T/C	-0.248297	3.22e-08	6	1	0	0	0	0	0	0	1	0	0	0	1	0	0	1	1	0	0	0	1	1	0	0	0	1	0
BZ	1	120.569	208467821	G/A	-1.53786	1.34e-07	9	1	0	0	0	0	0	0	1	0	1	1	1	1	0	1	0	0	0	1	1	1	1	0	0	1	0
CL	1	136.196	229199481	T/C	2.12522	5.51e-16	71	0	1	0	0	0	1	1	0	0	1	0	1	1	1	0	1	1	0	0	1	0	0	0	0	0	0
CL	1	136.435	229513323	C/T	2.47756	1.2e-13	8	0	0	0	0	0	1	0	1	0	1	0	0	0	1	0	1	1	0	0	0	0	0	0	0	0	0
BZ	1	136.447	229528589	T/C	-5.04036	4.78e-14	8	1	0	0	0	0	0	0	0	0	0	0	0	0	0	0	0	0	0	0	0	0	0	0	0	1	0
BZ	1	136.447	229528951	-/G	-3.72096	9.96e-12	5	1	0	0	0	0	0	0	0	0	0	1	0	0	0	0	0	0	0	0	0	0	0	0	0	1	0
BZ	1	136.447	229528987	T/A	-4.28743	3.07e-10	8	1	0	0	0	0	0	0	0	0	0	0	0	0	0	0	0	0	0	0	0	0	0	0	0	1	0
SL	1	136.53	229637661	G/A	-3.27327	1.25e-07	6	0	0	1	0	0	0	0	0	1	0	1	0	0	0	1	0	0	1	0	0	0	1	0	0	0	0
BZ	1	138.744	233941521	C/A	-4.232	3.21e-10	23	1	0	0	0	0	0	0	0	0	0	0	0	0	0	0	0	0	0	0	0	0	0	0	0	1	0
BZ	1	139.901	236880350	G/C	-3.62474	2.76e-11	7	1	0	0	0	0	0	0	0	0	0	1	0	0	0	0	0	0	0	0	0	0	0	0	0	1	0
CD	1	140.051	237261221	T/G	-0.225847	7.66e-08	10	1	0	0	0	0	0	0	0	0	0	0	0	0	1	0	0	1	1	1	0	0	1	0	0	0	0
CD	1	140.109	237409005	G/A	-0.316892	4.22e-08	16	1	0	0	0	0	0	0	0	0	0	0	0	0	0	0	0	0	1	1	0	0	0	0	0	0	0
SL	1	140.329	237861860	C/G	5.39414	1.14e-08	6	0	1	0	0	0	0	0	0	0	0	0	0	0	0	0	1	0	0	0	0	0	0	1	0	0	0
TL	1	140.329	237861860	C/G	6.12636	4.84e-10	28	0	1	0	0	0	0	0	0	0	0	0	0	0	0	0	1	0	0	0	0	0	0	1	0	0	0
SL	1	140.932	238903663	T/-	-4.43272	1.22e-14	5	0	0	0	0	0	0	0	0	0	1	1	0	0	1	1	0	1	0	1	0	0	0	0	1	0	0
SL	1	140.933	238903684	C/G	-3.91705	3.64e-18	16	0	0	1	0	0	1	1	0	1	1	1	0	0	1	1	0	1	0	1	0	0	0	0	1	0	1
CD	1	141.241	239436713	A/G	0.420053	4.07e-16	100	0	0	0	0	0	1	1	0	0	0	0	1	0	0	1	0	0	0	0	0	0	0	0	0	0	0
SL	1	141.315	239563655	A/G	-3.05159	5.89e-14	5	1	0	1	0	0	1	1	0	1	1	1	1	1	1	0	0	1	0	1	1	1	0	0	0	0	0
SL	1	142.851	242414180	T/C	-6.24773	1.71e-11	8	0	0	0	0	0	0	0	0	0	0	1	0	0	0	0	0	0	0	1	0	0	0	0	1	0	0
SL	1	143.114	242922697	AT/--	-4.08734	1.86e-15	10	1	0	0	1	0	0	1	0	0	1	1	0	1	1	0	0	0	0	1	0	1	0	0	1	0	0
SL	1	143.413	243499201	C/T	-4.07298	1.64e-15	6	1	0	1	0	0	0	1	0	1	0	1	0	1	1	0	0	0	0	0	1	1	0	0	1	0	0
TL	1	144.192	245007507	A/G	7.59976	1.66e-09	7	0	1	0	0	0	0	0	0	0	0	0	0	0	0	0	1	0	0	0	0	0	0	0	0	0	0
BN	1	144.491	245584853	-/C	-0.341638	3.62e-09	10	1	0	0	0	0	0	0	1	0	0	0	1	0	0	0	0	0	0	0	1	1	0	0	0	0	0
BN	1	144.492	245586873	GA/--	-0.391881	8.76e-08	13	0	0	0	0	0	0	0	1	0	0	0	0	0	0	0	0	0	0	0	1	0	0	0	0	1	0
BZ	1	144.577	245751190	C/T	-4.67665	6.74e-12	11	1	0	0	0	0	0	0	0	0	0	0	0	0	0	0	0	0	0	0	0	0	0	0	0	1	0
TL	1	145.42	247382344	A/C	-4.59557	2.48e-20	25	1	0	0	0	0	1	1	0	1	0	1	0	0	1	0	0	1	0	1	0	1	1	1	1	1	0
BZ	1	145.491	247517986	A/G	-2.93389	4.21e-12	5	1	0	0	0	0	0	0	0	0	0	1	0	1	0	0	0	0	0	0	0	0	0	0	1	1	0
BZ	1	145.491	247518562	----/GCGA	-2.94158	3.17e-12	5	1	0	0	0	0	0	0	0	0	0	1	0	1	0	0	0	0	0	0	0	0	0	0	1	1	0
TL	1	145.576	247682336	C/T	-6.04227	7.95e-15	7	1	0	0	0	0	0	0	0	0	0	1	0	0	0	0	0	0	0	0	0	1	0	0	1	1	0
CL	1	146.227	248593486	A/C	1.46021	7.13e-10	6	1	1	1	0	0	0	0	1	0	1	0	1	1	1	1	1	1	0	0	1	1	1	1	0	1	0
TL	1	148.762	250918347	C/G	5.79902	2.22e-12	5	0	1	0	0	0	0	1	0	0	0	0	0	0	0	0	1	0	1	0	0	0	0	1	0	0	0
TL	1	148.87	251125589	G/A	-7.01324	7.7e-16	15	0	0	0	0	0	1	0	0	0	0	1	0	0	1	0	0	0	0	0	0	0	0	0	1	0	0
CL	1	148.872	251129181	--/TG	1.71214	4.04e-16	9	1	1	1	0	0	1	0	0	0	0	0	1	1	1	0	1	1	1	0	1	0	1	1	0	1	1
SL	1	148.9	251183043	T/G	-4.95645	6.5e-13	11	0	0	0	0	0	1	0	0	0	1	1	0	0	0	0	0	0	0	0	0	1	0	0	1	0	0
TL	1	148.9	251183043	T/G	-5.97585	3.98e-13	6	0	0	0	0	0	1	0	0	0	1	1	0	0	0	0	0	0	0	0	0	1	0	0	1	0	0
SL	1	149.01	251394642	GC/--	-4.74306	9.39e-12	6	0	0	0	0	0	0	0	0	0	1	1	0	0	0	1	0	1	0	0	0	1	0	0	1	0	0
TL	1	149.014	251401725	C/T	-6.58358	1.31e-13	5	0	0	0	0	0	0	0	0	0	0	1	0	0	1	0	0	1	0	0	0	0	0	0	1	0	0
TL	1	150.478	253687602	C/G	-5.03539	6.88e-15	16	1	0	0	1	0	0	0	0	0	1	1	0	0	1	0	0	1	0	1	0	1	0	0	0	0	0
TL	1	150.478	253687755	C/T	-5.84209	4.01e-13	16	1	0	0	0	0	0	0	0	0	1	1	0	0	0	0	0	1	0	1	0	0	0	0	0	0	0
CL	1	151.634	255123321	G/A	2.99292	3.86e-10	6	0	1	1	0	0	0	0	0	0	0	0	0	1	0	0	0	0	0	0	0	0	0	0	0	0	0
BZ	1	151.982	255555853	----/ACTG	-1.74886	2.6e-14	6	1	0	1	1	1	1	1	1	0	1	1	1	1	1	1	0	0	0	1	1	1	1	0	1	1	0
CL	1	152.238	255974797	G/A	2.5161	4.97e-12	17	0	1	1	0	0	0	0	0	0	0	0	0	1	0	0	0	0	0	0	1	0	0	1	0	0	0
CL	1	154.745	258075525	T/C	2.24701	1.26e-10	5	0	1	1	0	0	0	0	0	0	0	0	1	1	0	0	1	0	0	1	0	0	0	0	0	0	0
BN	1	155.856	259007624	A/T	-0.328203	2.61e-14	26	1	1	0	0	0	1	0	0	0	0	0	1	0	0	1	0	0	0	0	0	1	1	0	0	1	0
BN	1	155.886	259066995	G/A	-0.319146	6e-15	10	1	0	0	1	0	1	0	1	0	0	0	1	0	0	0	1	0	0	0	0	1	1	0	0	1	0
BZ	1	156.532	260622731	A/T	-2.59615	1.2e-20	18	0	0	1	0	0	1	0	1	0	1	1	1	1	0	1	0	1	0	0	1	1	0	0	1	0	0
BZ	1	158.147	263278001	T/G	-2.47991	2.59e-18	21	0	1	0	1	0	1	0	1	0	0	1	1	1	1	0	0	0	0	0	1	1	0	0	0	1	0
BN	1	158.184	263324462	C/T	-0.330422	1.9e-15	9	0	1	0	0	0	1	0	1	0	0	0	1	0	0	0	0	0	0	0	1	1	1	0	1	1	0
BZ	1	158.184	263324462	C/T	-2.30517	1.27e-13	17	0	1	0	0	0	1	0	1	0	0	0	1	0	0	0	0	0	0	0	1	1	1	0	1	1	0
ERN	1	158.227	263378299	G/A	-0.308155	2.83e-09	53	0	0	0	0	1	0	0	0	0	0	0	0	0	0	0	0	0	0	0	0	0	0	0	0	1	0
BN	1	158.289	263456184	T/C	-0.253559	1.31e-10	7	0	1	0	1	0	1	0	1	0	0	0	1	1	0	0	0	0	0	0	1	1	1	0	1	0	0
BZ	1	158.289	263456184	T/C	-2.51632	6.03e-17	6	0	1	0	1	0	1	0	1	0	0	0	1	1	0	0	0	0	0	0	1	1	1	0	1	0	0
BZ	1	158.431	263634269	T/C	-2.96173	2.88e-12	14	0	0	0	0	0	1	0	0	0	0	0	1	1	0	0	0	0	0	0	1	1	0	0	0	0	0
ERN	1	159.632	265144615	A/G	-0.239218	4.67e-08	5	0	0	0	0	1	0	0	0	0	0	0	0	0	0	0	0	0	0	0	0	1	0	0	0	1	0
SL	1	159.642	265157056	C/T	4.5224	9.85e-13	12	0	0	1	0	0	0	0	1	0	0	0	1	0	0	1	0	1	1	0	0	0	0	1	0	0	0
TL	1	159.677	265200490	C/G	9.74734	3.94e-14	7	0	0	0	0	0	0	0	1	0	0	0	0	0	0	0	0	0	1	0	0	0	0	0	0	0	0
BZ	1	161.37	267328380	G/T	-1.93941	8.5e-14	6	1	1	1	0	0	0	0	0	1	0	1	1	1	0	1	1	0	0	0	1	1	1	0	0	1	1
ERN	1	162.813	270018756	G/C	0.161139	7.92e-13	33	0	0	1	1	0	1	1	0	1	0	0	0	1	1	1	0	0	0	0	1	0	0	0	0	0	1
CL	1	163.571	270994131	T/-	1.38891	2.45e-10	20	1	1	1	0	0	1	0	1	0	1	0	0	1	0	0	1	1	0	0	1	0	1	1	0	1	1
SL	1	164.655	272366251	ACGCGC/------	3.67157	3.64e-19	20	0	1	1	1	1	1	0	1	1	1	0	1	1	1	1	1	1	1	1	1	1	0	1	1	1	0
SL	1	164.765	272460958	T/C	4.49237	2.46e-22	18	0	1	1	1	0	0	0	1	1	0	1	1	1	1	0	1	1	1	1	1	0	0	1	1	0	1
SL	1	165.04	272698321	T/A	4.29075	5.66e-25	26	0	1	1	1	1	1	1	1	0	1	0	1	1	1	0	1	1	1	1	1	1	0	1	1	0	1
SL	1	165.142	272786368	C/A	4.67427	4.08e-15	5	0	1	0	0	0	0	0	1	0	0	0	0	0	1	0	0	1	1	0	0	1	0	1	0	0	0
SL	1	165.144	272787546	G/C	4.80713	1.59e-13	10	0	1	0	0	0	0	0	1	0	0	0	0	0	0	0	0	1	1	0	0	1	0	1	0	0	0
TL	1	165.144	272787546	G/C	5.24683	3.28e-12	17	0	1	0	0	0	0	0	1	0	0	0	0	0	0	0	0	1	1	0	0	1	0	1	0	0	0
BZ	1	166.222	273717050	G/T	3.27113	4.78e-09	9	0	0	0	0	0	0	0	0	0	0	0	0	0	1	0	0	0	1	0	0	0	0	0	0	1	0
CL	1	166.493	273949982	GGG/---	1.48451	2.02e-10	7	1	1	1	0	0	0	0	1	0	0	1	0	1	0	0	1	0	1	0	0	0	1	1	1	1	0
BN	1	166.59	274034244	C/A	-0.32963	2.35e-16	42	1	0	0	0	0	1	0	0	1	0	1	1	0	0	1	0	1	0	0	0	1	1	0	1	0	0
SL	1	166.811	274224469	A/G	3.72221	3.96e-11	8	1	1	0	1	1	1	0	1	0	0	0	1	0	0	0	1	1	1	0	0	0	0	0	0	0	0
ERN	1	166.814	274227152	G/A	0.170327	3e-14	34	0	0	1	0	0	0	1	0	1	0	0	0	1	1	1	0	0	1	1	0	1	0	1	0	0	1
BN	1	167.405	274735872	C/T	0.366154	2.96e-11	8	0	0	0	0	0	0	0	1	0	1	0	0	0	1	0	0	0	0	1	0	0	0	1	0	0	0
SL	1	168.939	275870922	A/C	5.08426	1.91e-24	5	0	0	1	1	1	0	0	1	0	0	0	1	0	0	0	1	0	1	0	1	0	1	1	0	1	0
SL	1	169.425	276854245	C/T	3.95196	1.13e-19	20	1	1	1	1	1	0	1	1	1	0	0	1	1	1	0	1	0	1	0	1	1	0	1	0	0	1
TL	1	169.426	276854778	T/C	5.80316	2.33e-18	12	0	0	1	1	1	0	0	1	0	0	0	1	0	1	0	1	0	1	0	0	0	0	0	0	0	0
TL	1	169.426	276855188	T/C	5.58986	2.36e-22	21	1	0	1	1	1	0	1	1	0	0	0	1	0	1	0	1	0	1	0	0	0	0	1	0	0	0
TL	1	169.426	276855401	A/C	5.31581	2.26e-15	14	0	0	1	1	1	1	1	1	0	0	0	1	0	1	0	1	0	1	0	0	0	0	1	0	0	0
BZ	1	170.046	277432066	A/-	1.57535	1.24e-08	7	0	0	0	0	1	0	1	1	1	1	0	0	1	1	1	0	1	1	0	0	0	0	1	1	0	0
BN	1	170.311	277678540	G/C	0.45063	5.46e-10	27	0	0	0	0	0	0	0	0	0	0	0	0	0	1	0	0	0	0	1	0	0	0	0	0	1	0
SL	1	170.569	277917823	A/C	3.56397	6.17e-12	6	1	1	1	1	1	0	0	1	0	0	0	1	1	0	0	1	0	1	0	1	1	0	0	0	1	1
BZ	1	170.729	278067270	G/A	1.63893	5.32e-09	7	0	0	1	0	1	0	1	1	1	1	0	0	0	1	1	1	1	1	0	0	0	0	1	0	0	0
SL	1	171.118	278428375	TTGAATG/-------	3.79991	1.27e-15	5	1	1	1	1	1	0	0	1	1	0	0	1	1	1	0	1	1	1	1	0	0	0	1	0	1	1
TL	1	171.122	278432830	A/G	5.55614	4.64e-29	39	1	1	1	1	1	0	0	1	1	1	0	1	1	1	0	1	1	1	1	0	0	0	1	0	0	0
TL	1	171.178	278484173	T/G	4.74515	2.44e-20	12	1	1	1	1	1	0	0	1	1	1	0	1	1	1	0	1	1	1	1	0	0	0	1	0	0	0
CD	1	171.269	278568757	T/C	0.302064	1.48e-08	12	0	0	0	0	0	0	0	0	1	0	0	1	1	0	0	0	0	0	0	0	0	0	1	0	0	0
TL	1	172.507	279218355	-----/AGTCC	10.4884	5.14e-15	32	0	0	0	0	0	0	0	1	0	0	0	0	0	0	0	0	0	1	0	0	0	0	0	0	0	0
SL	1	172.794	279354845	G/A	4.01928	9.41e-11	6	0	0	1	0	1	0	1	1	0	0	0	1	0	0	0	1	0	0	0	0	0	0	1	0	0	0
SL	1	173.567	279722829	G/A	6.62285	7.17e-13	24	0	0	0	0	0	0	0	1	0	0	0	1	0	0	0	0	0	1	0	0	0	0	0	0	0	0
TL	1	173.814	279840559	A/G	7.20733	1.64e-10	10	0	0	0	0	0	0	0	1	0	0	0	0	0	0	0	0	0	1	0	0	0	0	1	0	0	0
CD	1	175.872	280877252	G/C	0.160979	8.04e-10	5	1	0	1	1	1	1	1	1	1	1	0	1	1	1	1	0	1	0	0	1	0	1	1	1	0	0
BN	1	175.964	280961241	T/C	0.292725	1.18e-09	28	0	0	0	0	0	0	1	0	1	0	0	0	0	1	0	0	1	0	1	0	0	0	1	1	0	0
BZ	1	176.152	281132907	G/A	2.6809	1.18e-08	12	0	0	0	0	0	0	1	1	0	0	0	0	0	1	0	0	0	1	0	0	0	0	0	0	0	0
ERN	1	176.516	281466835	G/C	0.132311	1.23e-09	6	0	1	1	0	0	0	0	1	1	0	0	0	1	1	0	0	1	0	1	0	0	1	1	1	0	1
CD	1	176.545	281493393	----/TTTG	0.232315	1.79e-07	6	0	0	0	1	1	0	1	0	1	0	0	0	0	1	0	0	0	0	0	0	0	1	0	0	0	0
CD	1	177.108	282203460	T/C	0.318665	3.16e-10	9	0	0	0	0	0	0	0	0	1	0	0	1	0	0	0	0	0	0	0	1	0	1	0	0	0	0
CD	1	177.318	282593257	G/A	0.269058	3.78e-09	7	0	0	1	0	0	0	0	0	1	0	0	1	1	0	1	0	0	0	0	0	0	0	0	0	0	0
CD	1	177.5	282929548	T/G	-0.291861	2.33e-11	30	0	1	0	1	1	0	0	0	0	0	0	0	0	0	0	0	0	0	0	0	1	0	0	1	1	0
CD	1	177.5	282929635	A/T	-0.271336	4.87e-09	20	0	0	0	1	1	0	0	0	0	0	0	0	0	0	0	0	0	0	0	0	1	0	0	1	1	0
CD	1	177.975	283464153	C/T	0.32993	1.65e-10	33	0	0	1	0	0	0	1	0	1	0	0	1	0	0	0	0	0	0	0	0	0	0	0	0	0	0
CD	1	178.042	283540093	G/C	0.311927	9.09e-10	5	0	0	1	0	0	0	0	1	1	0	0	1	0	0	0	0	0	0	0	0	0	0	0	0	0	0
TL	1	178.448	283997265	TA/--	8.47635	2.08e-11	9	0	0	0	0	0	0	0	1	0	0	0	0	0	0	0	0	0	1	0	0	0	0	0	0	0	0
CD	1	180.057	285313213	A/G	-0.393938	6.29e-08	5	0	0	0	0	0	0	0	0	0	0	0	0	0	0	0	0	0	0	0	0	1	0	0	0	1	0
BN	1	180.908	285893732	G/T	0.256259	2.41e-10	8	0	0	0	1	0	0	1	1	0	1	0	0	0	1	0	0	0	1	0	1	0	0	0	0	1	1
ERN	1	183.653	287659374	A/G	-0.229243	1.11e-09	7	0	0	0	0	1	0	0	0	0	0	0	1	0	0	0	0	0	0	0	1	0	0	0	0	1	0
CD	1	185.863	289079251	A/C	0.228312	1.62e-08	5	0	0	1	0	0	0	0	1	1	0	1	0	1	1	0	0	0	0	0	1	0	0	0	0	0	0
ERN	1	189.061	291114277	CTACGG/------	-0.228201	7.7e-10	5	0	0	0	1	1	0	0	0	0	0	0	1	0	0	0	0	0	0	0	0	0	0	0	0	1	0
ERN	1	191.723	292105730	--/AC	-0.242058	1.05e-08	10	0	0	0	0	0	0	0	0	0	0	0	1	0	0	0	0	0	1	0	0	0	0	0	0	1	0
ERN	1	192.523	292566860	G/T	-0.120752	4.98e-09	7	0	1	0	1	0	1	1	0	1	0	0	1	1	0	1	1	0	1	0	1	1	0	1	1	1	0
ERN	1	197.196	294644102	C/T	-0.165646	2.25e-08	15	0	1	0	0	0	0	1	0	0	0	0	0	0	0	0	0	0	0	1	0	1	0	1	0	1	0
ERN	1	199.531	295872847	A/G	-0.174591	1.31e-16	74	1	0	1	1	1	0	0	0	0	1	1	1	0	0	1	1	0	1	0	1	1	0	0	1	0	0
SL	1	200.665	296630497	C/G	-2.82416	1.92e-16	12	1	0	1	1	1	1	0	0	1	1	1	0	0	0	1	0	1	1	1	1	1	1	1	1	1	1
TL	1	200.742	296682199	C/A	-2.94538	3.62e-12	8	1	1	1	0	1	1	1	1	1	1	1	1	0	0	1	0	0	0	1	1	1	1	1	0	0	0
TL	1	201.215	296953867	T/G	-3.18295	2.5e-13	7	1	1	1	0	1	1	0	1	1	1	0	1	0	0	1	0	0	1	0	1	1	1	0	0	1	1
SL	1	202.239	297620559	C/G	-3.10462	1.33e-18	5	1	1	1	0	1	1	1	1	1	0	0	1	0	0	1	1	1	0	1	1	0	1	1	0	0	1
TL	1	202.239	297620559	C/G	-2.95857	6.52e-13	5	1	1	1	0	1	1	1	1	1	0	0	1	0	0	1	1	1	0	1	1	0	1	1	0	0	1
SL	1	202.239	297620560	A/C	-2.76648	5.77e-18	57	1	1	1	0	1	1	1	1	1	0	1	1	0	0	1	1	1	0	1	1	1	1	1	1	1	1
TL	1	202.239	297620560	A/C	-2.60407	1.85e-12	24	1	1	1	0	1	1	1	1	1	0	1	1	0	0	1	1	1	0	1	1	1	1	1	1	1	1
CD	1	202.239	297620711	C/G	-0.242676	5.9e-32	10	1	1	1	1	1	1	1	1	1	1	1	1	0	1	1	1	1	1	1	1	1	1	1	1	1	1
ERN	1	202.268	297656777	G/A	-0.127923	8.18e-14	7	1	1	1	1	1	1	1	0	0	1	1	1	0	0	1	1	1	1	1	0	1	1	1	1	1	1
SL	1	202.268	297656790	A/T	-2.81148	3.15e-19	5	1	1	1	1	1	1	1	1	1	1	1	1	0	0	1	1	1	0	1	1	1	1	1	1	1	1
TL	1	202.343	297752809	C/A	-3.2295	7.68e-12	5	0	1	1	0	1	1	0	1	1	0	1	0	0	0	0	0	1	0	1	0	0	1	1	1	0	1
SL	1	202.352	297764068	T/C	-2.78318	3.08e-16	6	0	1	1	0	1	1	0	1	1	1	1	1	0	1	0	0	1	0	1	1	1	1	1	1	1	1
TL	1	202.464	297907151	T/C	-2.68433	3.03e-12	9	1	1	1	0	1	1	0	1	1	1	1	1	1	1	1	1	1	0	1	1	0	0	1	1	0	1
TL	1	202.549	298015978	T/C	-2.95389	6.9e-12	7	1	1	1	0	0	1	0	1	1	0	1	1	0	0	0	0	1	1	1	1	1	0	1	1	1	0
CD	1	202.669	298169357	C/T	-0.237946	1.16e-28	10	1	1	0	1	1	1	1	1	0	1	1	1	1	1	1	1	1	1	1	1	1	0	1	1	1	1
ERN	1	202.67	298169427	C/T	-0.146903	1e-07	9	0	1	0	1	0	0	0	0	0	1	1	1	0	0	1	1	1	1	0	1	1	0	0	1	1	0
CD	1	203.447	299161330	A/C	-0.283552	2.08e-33	41	0	1	0	0	1	1	0	1	1	1	1	1	1	1	0	1	0	1	1	1	1	1	1	1	1	1
CD	1	203.811	299624687	A/G	-0.26344	1.38e-33	20	0	1	1	1	1	1	1	1	1	1	1	1	1	1	1	1	0	1	1	1	1	1	1	1	1	1
CD	1	203.858	299685288	A/C	-0.237066	1.45e-26	5	0	1	1	1	1	1	1	1	0	1	1	0	1	1	1	1	1	1	1	1	1	1	1	1	1	1
TL	1	204.02	299891986	C/G	-3.43826	1.33e-12	6	0	0	0	0	1	1	0	1	1	0	0	1	0	0	1	1	1	0	0	1	0	1	1	0	1	1
CL	2	3.26118	1943841	G/A	-1.96248	6.44e-13	42	0	0	0	0	1	1	0	0	0	1	0	1	1	1	0	1	0	0	0	0	0	0	1	1	0	0
BZ	2	3.29178	1950619	A/G	-1.61163	4.28e-10	9	1	1	1	1	1	1	1	1	1	1	0	0	0	0	1	0	1	1	0	1	1	1	0	0	0	1
TL	2	3.91687	2089096	T/C	-2.92333	1.11e-11	13	1	1	0	1	1	1	1	1	1	1	0	1	1	0	1	1	1	1	1	0	0	0	0	1	0	1
BZ	2	5.81814	2536633	C/G	-2.3997	7.54e-09	5	0	0	0	0	0	0	0	0	0	1	0	0	0	0	0	0	1	0	0	1	0	1	0	1	0	0
BZ	2	6.1159	2669007	T/G	-1.26375	1.57e-08	6	1	1	1	1	1	0	1	1	1	1	1	0	0	0	1	0	1	1	1	1	1	1	1	1	1	1
BZ	2	6.76252	3043372	C/A	-2.48323	2.41e-09	10	0	0	0	0	0	1	0	0	0	1	0	0	0	0	0	0	1	0	0	1	0	1	0	0	0	0
CL	2	6.97881	3127520	T/A	-1.62586	9.19e-14	22	0	1	1	0	1	1	0	0	1	1	0	1	1	1	0	1	0	0	0	0	1	1	1	0	0	0
BZ	2	7.14269	3173529	T/G	-1.3979	1.51e-11	5	0	1	1	1	1	1	1	1	0	1	1	1	0	0	1	1	1	1	0	1	1	1	1	1	1	1
BZ	2	7.41465	3214055	G/C	-1.54914	1.4e-10	9	0	1	1	1	1	1	1	0	1	0	0	0	0	0	1	0	1	1	1	1	1	1	0	1	1	1
SL	2	7.43865	3217632	GCGGCG/------	3.80034	1.24e-07	13	0	0	0	0	0	0	0	0	0	0	0	0	0	0	0	0	0	1	0	1	0	0	0	0	1	1
SL	2	7.44042	3217896	A/G	4.09376	1.9e-08	13	0	0	0	0	0	0	0	0	0	0	0	0	0	0	0	0	0	1	0	1	0	0	1	0	0	1
BN	2	8.50028	3375834	--/AT	-0.663262	2.19e-08	9	0	0	0	0	0	0	0	0	0	0	0	0	0	0	0	0	0	0	0	0	0	0	0	0	0	1
BN	2	9.63462	3540576	T/G	0.393802	6.19e-15	9	0	0	0	1	0	0	0	1	0	0	0	1	0	1	0	0	0	0	1	0	1	1	0	0	0	0
BN	2	9.6903	3548663	--/TG	0.328118	3.21e-11	5	0	0	0	0	1	0	0	1	1	0	0	1	1	0	0	0	0	0	0	0	1	0	0	0	1	0
CL	2	10.365	3735630	G/A	-1.68659	1.43e-13	15	0	0	1	1	1	1	0	0	0	1	1	1	1	0	0	1	0	0	0	1	0	1	1	0	0	0
BZ	2	10.4313	3761455	A/G	-4.57462	3.36e-16	12	0	0	0	0	1	0	0	0	0	0	0	0	0	0	0	0	1	0	0	1	0	0	0	0	0	0
BN	2	11.1512	4041520	A/G	0.443644	5.68e-22	40	0	1	0	1	1	1	0	1	1	0	0	1	1	0	0	0	0	0	0	1	0	0	0	0	1	0
BN	2	11.2736	4089147	T/G	0.788495	3.88e-27	41	0	1	0	0	0	0	0	0	0	0	0	0	0	1	0	0	0	0	1	0	0	0	0	0	0	0
BZ	2	11.2736	4089147	T/G	4.10036	1.51e-14	21	0	1	0	0	0	0	0	0	0	0	0	0	0	1	0	0	0	0	1	0	0	0	0	0	0	0
BN	2	11.2754	4089829	A/T	-0.982471	5.65e-45	100	0	0	0	0	1	1	0	0	0	0	0	0	0	0	0	0	1	0	0	1	0	0	0	0	0	0
BZ	2	11.2754	4089829	A/T	-3.24195	8.2e-11	31	0	0	0	0	1	1	0	0	0	0	0	0	0	0	0	0	1	0	0	1	0	0	0	0	0	0
CD	2	11.4838	4170905	G/C	0.199619	9.17e-11	19	0	0	0	1	0	0	1	0	0	1	0	1	1	1	1	0	0	1	0	0	1	1	0	0	1	0
BN	2	11.5886	4200520	A/G	0.311627	1.55e-07	5	0	0	0	1	0	0	1	0	0	0	0	0	0	1	0	0	0	0	0	0	1	1	0	0	0	0
BN	2	11.8026	4256812	C/A	0.333966	2.03e-13	5	1	0	0	0	0	1	1	1	0	0	0	1	1	0	0	0	0	0	0	0	1	1	0	0	0	0
BN	2	11.853	4270067	T/A	0.435266	3.3e-11	5	0	0	0	1	1	0	0	1	0	0	0	0	0	0	0	0	0	0	0	0	0	1	0	0	0	0
BN	2	13.2763	4644449	C/A	0.967527	1.16e-26	42	0	0	0	0	0	0	0	0	0	0	0	0	0	1	0	0	0	0	1	0	0	0	0	0	0	0
BN	2	13.309	4653037	C/T	0.501637	NA	7	1	0	0	0	0	0	0	1	1	0	0	1	1	0	0	0	0	0	0	0	0	0	0	0	1	0
BN	2	13.3298	4658516	T/C	0.379329	1.46e-19	13	1	0	0	1	1	1	1	1	1	0	0	1	1	1	0	1	1	0	0	1	1	0	0	0	1	0
SL	2	13.4302	4684927	G/A	-6.71027	4.53e-23	59	0	0	0	0	0	0	1	0	0	0	0	1	1	0	0	1	0	0	1	0	0	0	0	0	0	0
BZ	2	13.9553	4823024	GA/--	-2.79445	1.53e-11	21	1	0	0	1	0	0	0	0	0	0	0	0	0	0	1	0	1	1	0	0	0	0	0	0	0	1
BZ	2	13.9571	4823521	------/GATTGT	-3.75521	2.48e-16	70	1	0	0	0	1	0	0	0	0	0	0	0	0	0	0	0	1	1	0	0	0	0	0	0	0	1
BN	2	14.1782	4881666	---/CCG	-0.707975	1.31e-12	6	0	1	0	0	0	0	0	0	0	0	0	0	0	0	0	0	0	0	0	0	0	0	0	0	0	1
BN	2	14.198	4886867	-/A	0.671485	1.09e-14	7	0	1	0	0	0	0	0	0	0	0	0	0	0	1	0	0	0	0	1	0	0	0	0	0	0	0
BZ	2	14.198	4886867	-/A	4.06514	1.2e-13	62	0	1	0	0	0	0	0	0	0	0	0	0	0	1	0	0	0	0	1	0	0	0	0	0	0	0
BZ	2	14.1995	4887276	T/G	4.59277	8.16e-16	11	0	1	0	0	0	0	0	0	0	0	0	0	0	1	0	0	0	0	1	0	0	0	0	0	0	0
BN	2	14.8432	5056589	A/G	0.616823	2.02e-27	5	0	0	0	0	0	0	0	1	1	0	0	0	0	1	0	0	0	0	1	0	1	1	0	0	0	0
CD	2	14.8733	5064482	TA/--	0.273302	7.96e-09	10	0	0	0	1	0	0	1	0	0	0	0	0	0	1	0	0	0	0	0	0	1	0	0	0	1	0
CD	2	14.901	5071789	C/T	0.328344	5.8e-10	59	0	0	0	1	0	0	0	0	0	0	0	0	0	0	0	0	0	1	0	0	1	0	0	0	1	0
SL	2	15.4505	5216326	CATG/----	5.10153	5.07e-08	17	0	0	0	0	0	0	0	0	0	1	0	0	0	0	0	0	0	0	0	1	0	0	1	0	0	0
BN	2	15.6909	5279542	C/G	-0.634362	2.36e-11	12	0	0	0	1	0	0	0	0	0	0	0	0	0	0	0	0	0	0	0	0	0	0	0	0	0	1
SL	2	16.7118	5548064	G/C	-5.40196	2.82e-32	42	1	1	0	0	0	0	1	1	1	1	0	1	1	0	0	1	0	0	1	0	0	0	1	0	0	0
TL	2	17.7866	5830785	G/A	-4.26978	4.25e-12	10	1	0	0	0	1	0	0	1	0	0	0	1	1	0	0	1	1	0	0	0	0	1	0	0	0	0
SL	2	18.1837	5902330	C/A	-3.41535	3.84e-09	12	1	1	0	0	1	0	0	1	1	0	0	0	0	0	0	0	0	0	1	0	0	0	0	0	0	0
SL	2	18.1886	5903206	A/G	-2.91927	1.54e-08	15	0	1	1	0	1	0	0	1	1	0	0	1	1	0	0	1	0	0	0	0	1	0	0	0	0	0
SL	2	18.9208	6206076	C/T	-3.12565	1.38e-09	24	1	1	0	1	0	0	0	1	0	0	0	0	0	0	0	1	1	0	0	0	1	0	1	0	0	0
ERN	2	26.231	8872991	GCGC/----	0.167055	1.82e-08	8	0	0	1	1	0	0	0	0	0	0	0	1	0	1	0	0	0	1	0	0	0	1	0	0	0	0
BN	2	27.4708	9350871	---/AGA	-0.349367	1.32e-11	13	0	1	0	1	0	0	0	0	0	0	0	1	1	0	0	0	1	0	0	1	0	0	0	0	1	1
BN	2	31.8559	11108796	G/C	-0.284771	4.77e-11	14	0	0	1	1	0	1	0	0	0	1	0	1	1	0	0	0	1	1	0	1	0	0	0	1	1	1
BN	2	31.8572	11109223	T/G	-0.370258	1.68e-21	37	1	0	1	1	0	0	0	0	0	1	0	1	1	0	0	0	1	1	0	1	0	0	0	1	1	1
BN	2	31.8579	11109482	T/C	-0.367283	2.01e-21	11	1	0	1	1	0	0	0	0	0	1	0	1	1	0	0	0	1	1	0	1	0	0	0	1	1	1
BN	2	33.588	11680885	C/A	-0.256466	2.59e-10	5	0	1	1	1	1	1	0	0	1	0	0	1	1	0	1	0	1	1	0	0	0	0	0	0	0	1
BN	2	37.5581	13243057	C/G	-0.258812	6.43e-09	5	0	1	1	1	0	0	0	0	1	0	0	1	1	1	0	0	0	0	1	0	1	0	0	0	1	0
CD	2	38.0014	13471366	C/A	0.2889	7.13e-21	81	1	1	1	1	1	0	1	0	1	0	1	1	1	1	1	0	1	1	0	1	0	0	0	1	1	0
ERN	2	40.4816	14693784	T/G	0.138844	4.88e-08	9	0	0	1	1	0	0	0	0	1	0	1	0	0	1	0	0	0	0	0	0	1	1	1	0	0	0
CL	2	40.8026	14921589	C/T	1.46582	8.38e-12	14	0	0	0	0	1	1	0	1	1	0	0	0	1	0	1	1	0	1	1	1	1	1	0	0	1	1
CL	2	40.8032	14922036	T/C	1.70013	2.93e-11	16	0	0	0	0	0	0	0	1	1	0	0	0	1	1	1	1	0	1	0	0	1	0	0	0	1	1
CD	2	41.1006	15171995	C/T	-0.208711	3.31e-11	67	1	1	1	0	1	0	0	1	1	1	0	1	1	1	0	1	1	0	0	1	1	0	0	0	0	1
CD	2	42.0843	15915215	C/A	0.242094	2.1e-10	12	0	0	1	0	0	1	1	0	0	0	1	1	1	0	0	0	0	0	0	0	0	0	0	1	1	0
BN	2	42.0966	15919762	G/C	-0.268544	7.87e-11	13	0	1	1	1	1	0	0	1	1	0	0	1	0	1	1	0	0	0	0	0	0	0	1	0	0	0
CD	2	43.0243	16263455	C/G	0.255982	9.1e-16	5	0	1	1	0	0	0	0	1	0	0	1	1	1	0	1	0	0	1	0	1	0	0	0	1	1	0
CD	2	43.0508	16273282	A/G	0.445305	4.9e-13	7	0	0	0	1	0	0	0	0	0	0	0	0	0	0	1	0	0	1	0	0	0	0	0	0	0	0
CD	2	43.0538	16274367	-/A	0.498119	2.15e-16	7	0	0	0	1	0	0	0	0	0	0	0	0	0	0	1	0	0	1	0	0	0	0	0	0	0	0
CL	2	43.0933	16289022	A/G	1.58293	1.85e-12	58	1	0	0	0	1	1	1	1	0	0	0	0	1	1	1	1	0	1	1	0	0	1	0	0	1	1
ERN	2	44.0542	16644994	-----/CAGAG	-0.265225	2.03e-12	24	0	0	0	0	0	0	0	1	0	0	0	0	0	0	0	1	0	0	0	0	1	0	0	0	0	1
ERN	2	46.4467	17531356	G/T	-0.190182	1.15e-11	7	0	0	0	0	1	1	0	1	0	0	0	0	0	0	1	1	0	0	0	1	0	0	0	0	0	1
SL	2	48.0965	18343454	G/A	5.56781	1.72e-07	10	0	0	0	0	0	0	0	0	0	0	0	0	0	1	0	0	0	0	0	0	0	0	1	0	0	0
TL	2	48.0965	18343454	G/A	6.6781	3.82e-08	8	0	0	0	0	0	0	0	0	0	0	0	0	0	1	0	0	0	0	0	0	0	0	1	0	0	0
SL	2	48.0965	18343457	C/T	5.63427	9.59e-08	9	0	0	0	0	0	0	0	0	0	0	0	0	0	1	0	0	0	0	0	0	0	0	1	0	0	0
SL	2	48.1321	18374682	C/A	4.35039	2.94e-07	9	0	0	0	0	1	0	0	0	0	0	0	0	0	1	0	0	0	0	0	0	0	0	1	0	0	0
ERN	2	48.9067	19054214	G/A	-0.344828	1.35e-14	14	0	1	0	0	0	0	0	1	0	0	0	0	0	0	0	1	0	0	0	0	0	0	0	0	0	0
SL	2	50.7044	20023154	A/G	-3.67836	1.93e-08	8	0	0	0	0	0	0	0	0	0	1	0	0	1	0	0	0	0	0	1	0	0	1	0	1	0	0
ERN	2	52.158	21299092	G/A	0.261356	4.15e-07	6	0	0	0	0	0	0	0	0	0	0	0	0	1	0	0	0	1	0	0	0	0	0	0	0	0	0
BN	2	52.9704	21791099	----/CATA	0.323769	4.38e-09	8	0	0	0	0	0	1	0	1	0	0	1	0	0	0	0	1	1	0	0	0	0	1	0	0	0	0
BN	2	54.1205	22532923	G/C	0.263892	5.94e-18	13	1	1	0	1	0	1	0	1	0	1	1	1	0	1	1	1	1	1	1	0	0	1	1	1	1	1
BN	2	54.1234	22534256	G/C	0.243754	4.43e-10	7	1	1	0	0	0	1	1	1	1	0	1	1	1	0	1	1	1	0	0	0	0	1	0	1	1	1
BN	2	54.3894	22658461	C/T	0.259202	3.1e-10	7	1	1	0	0	1	1	0	0	0	0	0	1	0	0	1	1	1	0	1	0	0	1	1	1	1	1
BN	2	54.4341	22679308	C/G	0.253411	1.05e-08	16	1	0	0	0	0	1	0	0	0	1	0	0	0	0	0	1	1	0	0	1	0	1	0	1	0	1
ERN	2	54.9172	22913479	A/T	-0.238451	7.13e-16	5	0	0	0	1	0	0	0	1	0	0	0	1	0	0	0	1	0	0	1	0	1	0	0	0	0	0
SL	2	55.1134	23103699	G/A	-4.63891	1.77e-10	8	0	0	0	0	0	1	0	0	0	0	0	0	0	0	0	1	0	0	1	0	0	1	0	0	0	0
ERN	2	55.2564	23242248	G/C	-0.165167	1.02e-11	13	0	1	0	1	1	1	1	0	0	0	0	0	0	0	1	1	0	0	0	0	1	0	0	0	0	1
SL	2	55.6675	23640609	A/C	-3.41586	2.32e-09	6	1	0	0	0	0	1	0	0	1	0	0	1	0	0	0	0	0	0	1	0	0	1	0	1	0	0
SL	2	55.6734	23646326	CGT/---	-6.26511	2.07e-09	6	0	0	0	0	0	0	0	0	0	0	0	0	0	0	0	0	0	0	1	0	0	1	0	0	0	0
BZ	2	55.7177	23689268	-----/CTACG	1.80284	9.78e-09	5	1	1	0	0	0	0	0	0	0	0	1	0	1	1	0	0	0	1	1	0	0	0	1	1	0	1
SL	2	55.8927	23858877	C/T	-4.94917	8.16e-09	17	0	0	0	0	0	0	0	0	0	0	0	0	0	0	0	0	0	0	1	0	0	1	0	1	0	0
ERN	2	55.9379	23902704	A/C	-0.18983	9.85e-13	7	0	1	0	1	1	0	0	1	0	0	1	0	0	0	0	0	0	0	1	0	0	0	0	1	0	1
ERN	2	56.1366	24095237	G/A	-0.227277	1.16e-13	22	0	1	0	1	1	0	0	1	0	0	0	0	0	0	0	1	0	0	0	0	0	0	0	0	0	1
BN	2	57.7002	26308740	T/C	0.272514	2.27e-16	10	1	0	0	1	0	0	1	0	0	1	1	1	0	1	1	1	1	1	1	0	0	1	1	1	1	0
SL	2	57.7365	26357681	C/T	-4.58051	1.14e-09	7	0	0	0	0	0	0	0	0	0	0	0	1	0	0	0	0	0	1	1	0	0	1	0	0	0	0
SL	2	57.7389	26360939	T/A	-5.58607	5.41e-11	5	0	0	0	0	0	0	0	0	0	0	0	1	0	0	0	0	0	0	1	0	0	1	0	0	0	0
ERN	2	58.3704	27211927	C/T	0.31398	8.16e-10	5	0	0	1	0	0	0	0	0	0	0	0	0	1	0	0	0	0	0	0	0	0	0	0	0	0	0
BZ	2	58.9807	27877150	-----/TGCAG	3.0394	2.21e-13	9	1	0	0	0	0	0	0	0	0	1	1	0	0	1	0	0	0	0	0	0	0	0	0	1	0	0
BN	2	59.727	28233552	C/T	0.284281	2.06e-11	42	0	0	0	0	0	1	1	0	0	0	1	1	0	0	0	1	1	0	1	0	0	1	1	0	1	0
CL	2	61.3566	29693556	T/C	2.02064	2.44e-09	14	0	0	1	0	1	0	0	1	1	0	0	0	0	0	0	1	0	0	0	0	1	0	0	0	0	0
CD	2	61.651	29971996	A/G	0.212869	2.61e-10	8	0	1	1	0	1	0	1	1	0	0	0	1	1	0	0	0	1	1	0	0	1	0	0	0	1	0
BZ	2	61.7581	30073189	A/G	3.25304	2.57e-15	28	1	0	0	0	0	0	0	0	0	0	1	0	0	1	0	0	0	0	0	0	0	1	0	1	0	0
BZ	2	61.8005	30114453	G/A	2.66685	6.49e-11	7	0	0	0	0	0	0	0	0	0	1	1	0	0	1	0	0	0	0	0	0	0	1	0	1	0	0
SL	2	62.2115	31416098	A/G	-4.50835	6.69e-10	15	0	0	0	0	0	1	0	0	0	0	0	0	0	0	0	0	0	1	1	0	0	1	0	0	0	0
CD	2	63.0338	32972845	A/G	0.276565	2.73e-12	46	0	1	1	0	0	0	1	0	1	0	0	0	1	0	1	0	0	1	0	0	0	0	0	0	0	0
CL	2	63.6828	34231557	-/A	2.18604	1.62e-10	24	0	0	0	0	1	0	0	0	1	0	0	0	1	0	1	0	0	0	0	0	1	0	0	0	0	1
CL	2	65.3478	36936494	G/A	1.49612	6.13e-10	6	0	0	1	1	1	1	1	1	1	0	0	0	1	0	0	1	0	0	0	1	1	1	0	0	1	1
CL	2	65.4814	37139373	C/T	3.69259	2.36e-10	7	0	0	0	0	0	0	0	0	1	0	0	0	0	0	0	0	0	0	0	0	1	0	0	0	0	0
BZ	2	65.5939	37310395	C/T	2.26509	3.13e-11	6	0	1	0	0	0	0	1	0	0	1	1	0	0	1	1	0	1	0	1	0	0	0	1	1	0	0
BZ	2	65.5944	37311155	-----/TGGGT	2.72383	1.41e-13	7	0	0	0	0	0	0	1	0	0	0	1	0	0	1	1	0	0	0	1	0	0	0	1	1	0	0
BZ	2	65.6056	37328160	C/T	2.66404	5.37e-09	6	0	0	0	0	0	0	0	0	0	0	1	0	0	1	0	0	0	0	1	0	0	0	1	1	0	0
CL	2	65.7983	37620879	G/A	2.23649	6.93e-12	5	0	1	0	0	1	0	1	1	1	0	0	0	0	0	1	0	0	0	0	0	1	0	0	0	0	0
BZ	2	67.8991	40812677	G/A	2.28491	4.17e-20	10	1	0	0	0	0	0	1	0	0	1	1	0	0	1	1	1	1	0	1	0	1	1	1	1	1	1
BZ	2	68.8202	42721638	T/C	2.50099	9.12e-13	6	0	0	0	0	0	0	0	0	0	1	1	0	0	1	1	0	0	0	1	0	0	1	0	1	1	0
ERN	2	71.3242	49240305	G/T	-0.195735	1.92e-21	64	1	1	0	1	1	0	0	1	1	0	1	1	0	1	0	1	1	0	0	1	1	0	1	1	1	1
CL	2	71.3833	49434125	G/A	1.9973	6.35e-12	5	0	1	0	1	1	0	1	0	1	0	0	1	0	1	0	1	0	0	0	0	1	0	0	0	1	1
BZ	2	72.2212	52461928	G/A	-2.28553	2.14e-09	6	1	1	1	1	0	0	0	0	0	0	0	0	1	0	0	0	0	0	0	0	0	1	0	0	0	0
BZ	2	72.2598	52677054	C/A	-3.95948	4.14e-10	5	0	0	0	1	0	0	0	0	0	0	0	0	1	0	0	0	0	0	0	0	0	0	0	0	0	0
ERN	2	72.2659	52711438	G/C	-0.191537	3.21e-10	6	1	0	0	0	0	0	0	0	0	0	1	1	0	1	0	0	0	0	0	0	1	0	1	1	0	1
ERN	2	72.8686	56076247	T/C	-0.174535	6.79e-18	22	1	1	1	1	1	0	1	1	1	0	1	1	1	1	1	1	0	1	0	1	1	0	0	1	1	1
BZ	2	73.3294	58648601	G/A	-2.28031	9.61e-10	16	0	0	0	1	1	0	1	0	0	0	0	0	1	0	0	0	0	0	0	1	1	0	0	0	0	0
BZ	2	73.4223	59167484	C/G	-3.31296	2.76e-10	5	0	0	0	0	1	0	0	0	0	0	0	0	1	0	0	0	0	0	0	0	1	0	0	0	0	0
TL	2	73.6423	60380130	--/TG	-4.77286	2.07e-15	8	0	0	1	0	1	1	0	0	0	0	0	0	1	0	0	1	0	0	1	0	1	1	0	0	0	0
ERN	2	74.8571	63820812	A/C	-0.149918	5.28e-11	23	1	1	1	1	1	0	1	1	1	1	1	1	0	1	1	1	0	0	1	1	1	0	0	1	0	1
ERN	2	75.145	68949262	G/A	-0.235012	3.81e-11	14	0	0	0	0	1	0	0	0	0	0	1	0	0	1	1	0	0	0	0	0	0	0	0	1	0	0
BZ	2	75.241	70658985	G/-	-1.96374	6.18e-10	7	0	1	0	1	1	0	0	1	1	0	0	1	1	0	0	0	0	0	0	1	1	0	0	0	0	0
CL	2	76.4012	98436879	A/G	1.81656	5.04e-15	30	0	1	0	1	1	0	1	1	1	1	0	1	0	1	1	1	1	1	1	0	1	0	0	0	1	1
BN	2	76.4875	106046335	T/A	0.238603	1.01e-07	5	0	0	0	0	0	0	0	1	0	1	0	1	0	1	1	0	1	1	1	0	0	0	0	0	1	0
CL	2	76.7229	112381649	C/T	2.12964	3.11e-23	45	1	0	1	1	1	0	1	0	1	1	0	1	1	1	1	1	1	1	1	0	1	0	0	1	1	1
CL	2	76.7362	112695680	C/T	1.89122	6.24e-18	5	1	1	0	1	1	0	1	0	1	1	0	1	0	1	1	1	1	1	1	0	1	0	0	1	1	1
CL	2	76.974	118282212	G/A	-2.39408	1.04e-07	7	0	0	0	0	0	0	0	1	0	1	0	0	0	0	0	1	0	1	0	0	0	0	0	0	0	0
CL	2	77.0939	121097388	C/T	1.8075	2.83e-15	8	1	1	1	1	1	1	1	0	1	1	0	1	1	1	1	0	0	1	1	0	1	0	0	0	1	1
CL	2	77.54	126743642	C/T	2.22105	1.27e-08	22	0	0	1	0	0	0	1	0	0	0	0	0	0	1	0	0	0	0	0	0	1	0	0	0	1	0
CD	2	81.5216	154125425	C/A	0.164502	2.29e-09	5	0	1	1	0	0	1	1	1	0	0	1	0	1	0	1	0	0	1	0	0	1	1	1	1	1	1
BN	2	81.5955	154847336	T/C	0.354949	1.27e-15	11	0	0	0	0	0	0	1	0	0	1	1	1	0	0	1	0	0	1	1	0	0	0	0	0	1	0
CD	2	81.6022	154912264	T/C	0.158654	2.63e-08	7	0	1	1	1	0	0	1	1	0	1	1	1	0	0	1	0	0	0	0	1	1	1	0	0	1	1
SL	2	82.44	161427918	G/A	-2.31756	9.41e-11	10	1	1	1	1	1	1	1	0	1	1	0	0	0	0	1	1	1	1	1	0	1	1	0	1	0	0
SL	2	84.9225	172493627	G/C	-2.68272	3.85e-09	23	1	0	0	0	1	0	0	0	0	0	0	1	0	0	1	1	1	1	1	0	1	1	1	1	0	0
SL	2	84.9225	172493769	T/A	-2.74406	3.18e-10	7	1	0	0	0	1	0	0	0	0	0	0	1	0	0	1	1	1	1	1	0	1	1	1	1	0	0
SL	2	84.9226	172493936	G/A	-2.72026	6.58e-09	33	1	0	0	0	0	0	0	0	0	0	0	1	0	0	1	1	1	1	1	0	1	1	1	1	0	0
BN	2	85.4977	173762406	C/G	0.208524	3.71e-11	21	1	0	0	0	0	1	1	1	1	1	1	1	0	1	1	1	0	1	1	0	0	1	1	1	1	1
BN	2	85.498	173763092	C/A	0.193459	1.88e-09	19	1	0	0	1	0	1	1	1	1	1	1	1	0	1	1	1	0	1	1	0	0	1	1	1	1	0
BN	2	86.3234	175081109	C/T	0.278152	1.6e-16	6	1	1	0	1	1	1	1	1	1	1	1	1	0	0	1	0	0	1	1	0	1	1	0	0	1	1
CD	2	86.4703	175315430	A/G	0.182436	1.17e-10	5	0	1	0	0	1	1	1	1	1	1	1	1	1	0	1	0	1	0	0	0	0	0	1	1	1	1
BZ	2	86.5768	175485242	-------/TCAACAA	1.62919	7.64e-09	5	0	0	0	0	0	1	1	1	0	1	0	1	0	1	1	0	0	1	1	1	0	0	0	0	1	1
BN	2	87.2193	176382557	---/CAG	-0.538473	6.38e-17	8	0	1	0	0	1	0	0	0	0	0	0	0	1	0	0	0	0	0	0	0	0	0	1	0	0	0
BN	2	87.9509	177257074	---/TTA	-0.618023	2.95e-23	10	0	1	0	1	1	0	1	0	0	0	0	0	1	0	0	0	0	0	0	0	0	0	0	0	0	0
BN	2	88.2593	177625748	A/C	-0.648617	6.04e-19	61	0	1	0	0	1	0	0	0	0	0	0	0	1	0	0	0	0	0	0	0	0	0	0	0	0	0
BN	2	88.3713	177759666	C/T	0.403783	2.6e-22	11	1	0	1	1	0	1	1	1	0	1	1	1	0	1	1	1	0	1	1	0	1	1	1	1	1	1
BN	2	88.3769	177766330	C/T	0.22712	9.71e-13	7	1	1	1	0	1	1	0	1	1	1	1	0	0	1	1	0	0	1	1	0	1	1	1	1	1	0
BZ	2	90.1425	179885622	A/G	1.8889	8.15e-10	7	1	0	0	0	0	0	1	1	1	1	0	0	0	1	1	0	0	0	0	0	1	1	0	0	1	0
CL	2	90.465	180336586	T/C	1.70641	9.47e-16	6	0	1	1	1	1	1	0	1	1	0	0	1	1	1	1	1	0	1	1	1	1	0	1	0	1	1
CL	2	90.4652	180336828	G/A	1.53595	3.39e-12	13	0	1	1	1	1	1	0	0	1	0	0	1	1	1	1	1	0	1	1	0	1	0	1	0	1	1
BN	2	90.7855	180784864	-/T	-0.644614	1.94e-13	8	0	0	0	0	1	0	0	0	0	0	0	0	1	0	0	0	0	0	0	0	0	0	0	0	0	0
SL	2	90.8319	180849738	T/G	-4.2007	2.15e-14	5	1	0	0	0	0	0	0	0	0	1	0	0	0	0	1	0	0	1	1	0	0	0	1	1	0	0
BZ	2	90.955	181021914	C/G	2.29599	7.27e-09	13	0	0	0	0	0	0	1	1	0	0	1	0	0	1	0	0	0	1	0	0	0	0	0	0	1	0
CD	2	91.9036	182102010	C/G	0.298327	1.93e-11	5	0	0	0	0	1	1	0	0	0	0	1	0	0	0	1	0	0	0	0	0	0	1	0	0	1	0
CD	2	91.9138	182110053	C/G	0.307999	1.02e-10	15	0	0	0	0	1	0	0	0	0	0	1	0	0	0	1	0	0	0	0	0	0	0	0	0	1	1
BN	2	92.1099	182264613	---/TGA	0.311554	6.58e-11	7	0	0	0	0	0	1	0	0	0	1	1	1	0	0	1	0	0	1	1	0	0	0	0	0	1	0
SL	2	93.3956	183277672	A/C	-4.11913	1.76e-15	11	1	1	0	0	0	0	0	0	0	1	0	0	0	0	1	0	1	1	0	0	1	0	0	1	0	1
CL	2	93.4964	183357125	T/G	1.93891	3.63e-19	12	0	1	1	1	1	1	1	1	1	0	0	1	1	1	1	1	0	1	1	1	1	0	0	0	1	1
CL	2	93.5907	183431442	A/T	2.11512	4.59e-13	6	0	0	1	0	0	1	1	0	1	0	0	1	1	0	0	0	0	0	1	0	0	0	0	0	1	1
CL	2	95.4188	184871876	------/CTGGCC	1.84635	3.42e-19	20	1	1	0	1	1	1	1	1	1	0	1	1	1	1	1	1	1	0	1	0	1	0	1	1	1	1
CL	2	95.539	184966636	G/T	2.0605	1.49e-13	17	0	0	0	1	0	1	1	0	1	0	0	1	1	0	1	0	0	0	1	0	1	0	0	0	1	0
SL	2	98.5107	187026891	C/T	-5.17213	7.93e-09	7	1	0	0	0	0	0	0	0	0	0	0	0	0	0	1	0	0	0	0	0	0	0	0	1	0	0
CD	2	100.648	189182744	C/T	-0.308577	7.63e-20	27	1	0	0	0	1	1	1	0	1	0	0	1	1	0	0	0	0	1	0	0	0	0	1	1	0	1
SL	2	100.665	189202089	G/A	-4.63253	3.32e-09	10	1	0	0	0	0	0	0	0	0	1	0	0	0	0	0	0	0	0	0	0	0	0	1	1	0	0
CD	2	100.665	189202112	A/T	-0.263895	3.11e-10	9	1	0	1	0	0	1	0	0	0	1	0	0	1	0	0	0	0	0	0	0	0	0	1	1	0	0
SL	2	100.777	189327899	T/A	3.36268	1.6e-08	5	0	0	0	0	0	0	0	1	0	0	1	0	1	0	0	1	1	0	0	0	1	0	0	0	1	0
SL	2	100.954	189526167	C/T	4.1684	1.57e-14	5	0	0	0	1	0	1	1	1	1	1	1	0	1	1	0	1	1	0	0	1	1	0	0	0	1	0
CD	2	101.218	189821550	--/AA	-0.284119	1.52e-19	8	1	0	1	1	1	0	0	0	0	1	0	1	1	1	0	1	0	0	0	1	0	0	1	1	0	1
CD	2	101.218	189821761	TGA/---	-0.262575	7.86e-16	5	1	0	1	1	1	0	1	0	0	1	0	1	1	1	0	1	0	1	0	1	0	0	1	0	0	0
SL	2	101.903	190589172	C/T	3.16359	9.53e-08	8	0	0	0	0	0	1	1	0	0	0	1	0	1	0	0	1	0	0	0	1	0	0	0	1	0	0
CD	2	102.841	191639815	C/G	-0.237287	3.94e-10	11	0	0	1	0	1	1	0	0	1	0	0	1	1	1	1	1	0	1	0	0	0	1	0	1	0	0
SL	2	103.267	192116384	---/GCA	-4.33311	4.53e-09	7	0	1	0	0	0	0	0	0	0	0	0	0	0	0	1	0	0	0	0	0	0	0	1	1	0	0
BN	2	104.74	193508522	G/A	-0.627546	1.86e-10	5	0	0	0	0	1	0	0	0	0	0	0	0	0	0	0	0	0	0	0	0	0	0	0	0	0	1
CD	2	105.116	193836630	A/G	-0.263465	9.89e-12	8	1	0	0	0	1	0	1	0	1	0	0	0	1	1	0	0	0	0	0	0	0	0	1	0	0	1
SL	2	105.117	193837814	G/A	-3.43398	2.55e-09	20	0	1	0	0	0	0	0	0	1	0	0	1	0	0	1	0	0	1	1	0	0	0	0	1	0	0
CD	2	105.12	193840104	T/G	0.359759	2.97e-10	17	0	0	0	0	0	0	0	0	0	0	1	0	0	0	0	0	1	0	0	0	0	0	0	0	1	0
CL	2	105.66	194698736	G/C	-1.83667	5.57e-08	6	1	0	0	0	1	0	0	0	0	0	0	0	0	0	0	0	0	1	0	1	0	0	0	1	0	1
CL	2	105.66	194698839	G/A	-1.68488	2.47e-08	6	1	0	0	0	1	0	0	0	0	0	1	0	0	0	0	0	0	1	0	1	0	0	1	1	0	1
BN	2	106.539	196073297	C/T	-0.805659	5.31e-09	8	0	0	0	0	0	0	0	0	0	0	0	0	0	0	0	0	0	0	0	0	0	0	0	0	0	1
CD	2	106.74	196444946	G/C	-0.198767	7.17e-08	5	1	0	1	0	0	1	1	0	0	1	0	0	0	1	0	1	0	0	0	0	0	0	1	1	0	0
SL	2	106.849	196645908	TTTCC/-----	-4.42172	1.56e-07	5	1	0	0	0	0	0	0	0	0	0	0	0	0	0	1	0	0	1	0	0	0	0	0	0	0	0
BN	2	106.856	196659218	T/C	0.315764	3.09e-13	33	0	0	0	1	0	0	1	1	0	1	0	1	0	1	1	1	0	0	0	0	0	0	0	0	1	0
BZ	2	106.856	196659218	T/C	2.13828	1.73e-09	14	0	0	0	1	0	0	1	1	0	1	0	1	0	1	1	1	0	0	0	0	0	0	0	0	1	0
CD	2	107.473	199257542	A/G	-0.259527	1.78e-12	8	1	0	1	0	1	1	1	0	0	0	0	1	1	0	0	0	0	0	0	0	0	0	0	1	0	0
CD	2	107.526	199453365	C/T	-0.17435	4.67e-09	7	1	0	1	1	0	1	1	1	1	1	0	0	1	1	0	0	0	0	0	0	1	1	1	0	0	0
BZ	2	108.189	200352205	A/G	2.63757	8.16e-17	7	0	0	0	0	0	0	1	1	0	1	1	1	0	1	0	0	0	0	0	0	0	1	1	0	1	0
BZ	2	108.452	200623255	A/C	2.55337	4.05e-23	28	0	0	1	0	0	0	1	1	0	1	0	1	1	1	1	1	0	1	0	1	0	1	1	0	1	0
BZ	2	108.453	200623476	-/A	2.62098	3.38e-23	5	0	0	1	0	0	0	1	1	1	1	0	1	1	1	1	1	0	0	0	0	0	1	1	0	1	0
BZ	2	108.862	201045235	A/G	1.7234	1.39e-13	9	0	1	1	1	0	0	1	1	1	1	1	1	1	1	1	1	1	0	1	0	1	0	1	1	1	0
CD	2	109.538	201740516	ACGGGC/------	-0.209343	4.77e-13	9	0	0	1	1	1	1	1	0	1	1	0	1	1	1	0	0	0	1	0	0	0	0	1	0	0	1
BN	2	110.797	202850781	C/T	0.494373	3.51e-19	27	0	0	0	0	1	0	0	1	0	1	0	1	0	0	1	0	0	0	0	0	0	0	0	0	1	0
BN	2	110.807	202859290	CAC/---	0.364487	2.54e-08	5	0	0	0	0	0	0	0	1	0	0	0	1	0	0	1	0	0	0	0	0	0	0	0	0	1	0
BZ	2	110.999	203017420	C/T	2.73127	7.45e-16	13	0	0	0	0	0	0	1	1	1	1	1	1	0	1	1	0	0	1	0	0	0	0	0	0	0	0
BZ	2	111	203018401	T/A	1.27903	2.56e-07	5	1	1	1	0	0	1	1	1	1	1	1	1	1	1	1	1	1	1	0	1	1	0	1	1	1	0
BZ	2	111.001	203018759	A/G	2.55315	1.91e-21	7	0	0	1	0	0	1	1	1	1	1	1	1	1	1	1	1	0	1	0	0	0	0	1	1	0	0
CL	2	111.346	203302952	-------/GTGGAGT	-2.54167	2.17e-11	20	1	0	0	0	1	0	0	0	0	0	1	0	0	0	0	0	0	1	0	1	0	0	0	0	0	0
BZ	2	111.824	203695600	A/G	1.62611	3.36e-07	10	0	1	1	1	0	1	1	1	1	1	0	1	1	1	0	1	0	1	1	0	0	1	0	1	0	0
BN	2	112.551	204293463	-----/CAGCA	0.713647	7.22e-15	30	0	0	0	0	0	0	0	1	0	1	0	0	0	0	0	0	0	0	0	0	0	0	0	0	0	0
BZ	2	113.202	204829514	A/G	1.4802	2.8e-10	5	0	0	1	1	0	0	1	1	1	1	1	1	1	1	1	1	1	1	1	0	1	1	1	1	1	1
ERN	2	114.156	205613715	T/C	-0.129186	5e-15	14	1	1	1	1	1	1	1	1	1	0	1	0	1	1	1	1	1	1	0	1	1	1	0	1	1	1
ERN	2	114.537	205927206	T/A	-0.117627	5.02e-10	5	1	1	0	1	0	1	1	1	1	0	0	0	0	1	1	0	1	1	0	0	0	1	0	1	1	1
ERN	2	114.709	206069080	T/A	-0.170188	1.96e-13	8	1	1	0	1	1	0	1	1	1	0	0	0	0	1	0	0	0	1	0	1	0	0	0	0	0	0
BN	2	114.837	206173635	GTC/---	-0.597958	1.48e-10	14	0	0	0	0	1	0	0	0	0	0	0	0	0	0	0	0	0	0	0	0	0	0	0	0	0	1
ERN	2	115.033	206335104	G/T	-0.133516	8.81e-14	12	1	1	1	0	1	0	0	1	1	0	1	0	0	1	1	1	1	1	0	1	0	1	0	1	1	1
ERN	2	115.033	206335462	T/C	-0.129315	8.31e-13	10	1	1	1	0	1	0	0	1	1	0	1	0	0	1	1	1	1	1	0	1	0	1	0	1	1	1
CL	2	116.642	207611460	T/C	-1.94147	1.12e-08	8	1	0	0	0	1	0	0	0	0	0	1	0	0	0	0	0	0	0	0	1	0	0	0	1	0	1
CL	2	121.253	210172520	T/G	1.45882	1.81e-07	13	1	1	0	0	0	0	0	1	0	0	0	1	0	0	0	0	1	0	1	0	0	1	1	0	0	0
BN	2	122.242	211015077	G/C	0.497127	1.94e-08	12	0	0	0	0	0	0	0	1	0	1	0	0	0	0	0	0	0	0	0	0	0	0	0	0	0	0
CD	2	123.994	212153371	G/A	0.2466	5.63e-08	10	0	0	0	0	1	1	0	1	0	0	0	0	0	0	1	0	0	0	0	1	0	0	0	0	0	0
BN	2	126.057	213777997	C/A	-0.516041	1.28e-08	8	0	0	0	0	1	0	0	0	0	0	0	0	0	0	0	0	0	0	0	0	0	0	0	0	0	1
BZ	2	126.25	213911813	A/G	2.44048	1.44e-15	22	0	1	0	1	0	1	0	1	1	0	1	0	0	0	0	1	0	1	1	0	0	0	0	0	0	0
TL	2	126.331	213968322	C/G	3.428	1.3e-15	10	1	1	1	1	1	1	1	1	1	1	0	1	1	0	0	1	0	0	1	1	0	0	0	0	1	0
BZ	2	126.484	214074743	G/C	2.13027	2.8e-13	10	1	1	0	1	0	0	0	1	0	1	0	0	1	0	0	1	0	1	1	0	1	0	0	0	1	0
BZ	2	126.484	214074785	C/A	2.27606	2.91e-13	10	1	1	0	1	0	0	0	1	0	1	0	0	1	0	0	0	0	1	1	0	0	0	0	0	1	0
BZ	2	126.523	214101783	C/A	-2.20873	1.38e-08	6	0	0	0	0	1	1	1	0	0	0	0	0	0	0	1	0	0	0	0	0	1	1	0	0	0	1
BZ	2	126.833	214316576	G/A	2.14546	1.34e-14	25	0	1	1	1	0	1	1	1	0	0	0	0	1	0	1	1	0	1	0	0	0	1	0	0	1	0
BN	2	127.35	214684468	C/T	0.460242	1.18e-07	7	0	0	0	0	0	0	0	1	0	1	0	0	0	0	0	0	0	0	0	0	0	0	0	0	0	0
SL	2	128.402	215607253	T/C	2.41146	2.04e-07	6	0	0	1	0	0	1	0	1	1	0	1	1	0	0	0	1	0	0	1	1	0	0	0	0	1	0
BZ	2	128.881	216027218	T/C	2.12897	2.31e-11	9	0	1	0	1	0	0	1	1	1	1	0	0	0	0	0	1	1	0	0	0	0	0	0	0	1	0
CD	2	131.174	217601907	G/C	0.19001	9.02e-08	6	0	0	0	0	1	0	0	0	0	1	0	0	0	0	1	1	0	0	0	1	1	0	1	1	1	0
CD	2	131.219	217627031	G/A	0.352	8.82e-09	6	0	0	1	0	0	0	0	0	0	0	0	0	0	0	1	0	0	0	0	1	0	0	0	0	0	0
CL	2	132.566	218708531	C/T	-2.40403	1.87e-11	6	0	0	0	0	1	0	0	0	0	1	1	0	0	0	0	0	0	0	0	1	0	0	0	1	0	0
BZ	2	132.587	218762572	T/G	2.06568	1.38e-13	10	1	1	0	1	0	0	1	1	1	0	0	1	1	0	0	1	0	1	1	0	0	0	1	0	0	0
CL	2	132.745	219161865	G/T	-1.73544	4.9e-11	9	0	0	0	0	1	0	0	0	0	0	1	0	1	1	0	0	0	1	0	1	1	1	1	0	0	0
SL	2	132.778	219245141	C/T	2.67973	1.53e-07	9	0	0	1	1	0	0	0	1	1	0	0	1	1	0	0	1	0	0	0	1	0	0	0	0	0	0
CD	2	133.11	219661543	T/C	0.413782	6.7e-09	25	0	0	0	0	0	0	0	0	0	0	0	0	0	0	1	0	0	0	0	1	0	0	0	0	0	0
CD	2	135.061	220905390	G/C	0.245033	4.55e-08	5	0	0	0	0	0	0	0	0	0	0	0	0	0	0	1	1	1	0	0	1	0	0	0	1	0	0
CD	2	135.061	220905805	A/T	0.288066	7.24e-09	17	0	0	0	0	0	0	0	0	0	0	0	0	0	0	1	0	1	0	0	1	0	0	0	1	0	0
CD	2	136.393	222375389	T/C	0.395856	2.65e-19	98	0	0	0	1	0	0	0	0	0	1	0	0	0	1	0	0	0	0	1	0	1	0	0	0	0	0
ERN	2	136.496	222480723	T/G	0.16353	1.97e-12	28	0	0	0	0	1	0	0	0	0	1	1	0	0	1	0	0	1	0	1	1	1	1	1	1	0	0
CL	2	137.424	223426549	A/G	-1.49226	3.9e-12	26	0	0	1	1	1	1	0	0	1	0	1	0	1	0	1	0	0	1	0	1	0	1	0	1	1	1
CD	2	138.095	224110344	A/G	-0.444568	2.53e-10	24	0	0	0	0	0	0	0	1	0	0	0	0	1	0	0	0	0	0	0	0	0	0	0	0	0	0
CD	2	138.987	225020051	-/A	-0.44228	4.06e-10	7	0	0	0	0	0	0	0	1	0	0	0	0	1	0	0	0	0	0	0	0	0	0	0	0	0	0
CL	2	139.03	225063129	G/A	-1.95883	3.54e-09	8	0	0	0	1	1	0	0	0	0	0	1	0	0	0	0	0	0	0	0	1	0	0	0	1	1	0
ERN	2	139.73	225777166	--/CG	0.113731	1.15e-12	5	1	1	1	0	1	1	1	1	1	1	1	1	0	1	1	1	1	0	1	1	1	1	0	1	0	1
ERN	2	140.087	225963380	A/C	0.145562	1.71e-12	8	0	1	0	1	1	0	0	0	1	1	1	0	0	1	1	1	0	0	1	0	0	1	1	1	0	0
ERN	2	140.142	225985451	T/C	0.184137	1.06e-08	5	0	0	0	1	0	0	0	0	1	1	0	1	0	0	0	0	0	0	0	0	0	1	0	0	0	0
ERN	2	140.147	225987642	A/G	0.163016	5.61e-17	23	1	1	0	0	0	1	0	0	1	1	0	1	0	1	1	0	0	0	1	1	1	1	1	1	0	0
ERN	2	140.485	226123250	T/G	0.169051	6.56e-20	5	0	1	0	0	1	0	0	1	0	1	0	1	1	1	1	1	0	0	1	1	1	1	1	1	0	1
ERN	2	140.577	226160411	---/CCC	0.133467	8.55e-08	7	0	0	0	1	1	0	0	1	0	1	0	1	0	1	1	0	0	0	0	1	0	1	0	1	0	1
ERN	2	141.461	226619544	T/G	0.271402	9.58e-11	17	0	0	0	0	0	0	0	0	0	1	0	0	0	0	0	0	0	0	0	0	0	1	1	0	0	0
CL	2	141.527	226689103	G/C	-1.57993	1.83e-10	7	0	0	0	1	1	0	1	1	1	0	1	0	1	0	0	0	0	0	0	1	0	0	1	1	0	0
CL	2	141.535	226697942	C/A	-1.47095	7.02e-10	16	0	0	0	1	1	1	1	1	1	0	1	0	1	0	0	0	0	0	0	1	0	0	1	1	0	0
ERN	2	142.684	227904374	T/C	0.112052	1.1e-08	10	0	1	0	1	1	0	1	1	1	1	0	1	0	0	1	1	0	0	0	1	1	1	1	0	1	1
CL	2	146.592	229350994	G/A	-1.45082	1.33e-08	5	0	0	1	0	0	1	1	0	1	0	0	0	1	1	0	0	0	0	0	1	1	0	1	1	1	0
ERN	2	148.205	229943260	-------/GCGGTGG	0.214358	3.31e-09	6	0	0	1	0	0	0	0	0	0	1	0	0	0	0	0	0	0	0	0	1	1	1	0	0	0	0
BN	2	150.38	230742558	G/C	0.250596	1.61e-20	7	1	1	1	1	1	1	1	1	1	1	0	1	1	1	1	1	0	0	1	1	1	1	1	0	1	1
BN	2	150.496	230785152	C/T	0.275247	2.09e-20	75	0	1	1	1	1	1	1	1	0	1	0	1	1	1	1	1	0	0	1	1	0	0	1	0	1	1
BN	2	150.499	230785942	-----/CTGTT	0.297087	8.4e-21	7	0	1	0	1	1	1	1	1	0	1	0	0	1	1	1	1	0	0	1	1	0	0	1	0	1	1
BZ	2	153.781	232449202	T/C	2.69889	4.78e-07	6	0	0	0	1	0	0	0	1	0	0	0	0	1	0	0	0	0	0	0	0	0	0	0	0	0	0
BZ	2	155.334	233345260	A/G	1.84967	3.47e-08	5	1	0	0	1	0	0	0	1	0	1	0	0	1	0	1	0	0	0	1	0	0	0	0	0	1	0
BZ	2	155.812	233621191	G/T	1.64165	2.66e-07	6	1	0	0	1	0	0	0	1	0	0	0	0	1	1	1	1	0	0	0	0	0	0	0	0	1	1
BZ	2	156.748	234161563	C/T	1.72564	2.43e-07	7	1	0	0	1	0	0	0	1	0	1	0	0	0	0	1	1	0	0	1	0	0	0	0	0	1	0
CD	3	4.67648	2143809	C/G	-0.168109	2.1e-11	6	1	1	1	1	1	1	1	1	1	0	0	1	1	1	1	1	0	1	1	1	0	0	1	0	1	1
CD	3	6.81588	2557252	G/T	-0.182094	1.65e-11	49	1	1	1	1	1	1	0	1	1	0	0	1	0	1	1	0	0	1	1	1	0	0	1	0	1	1
CD	3	6.88946	2571471	T/C	0.328925	1.83e-07	9	0	0	0	0	0	0	0	0	0	1	1	0	0	0	0	0	0	0	0	0	0	0	0	1	0	0
BZ	3	7.76534	2740736	C/T	2.23705	8.43e-08	25	0	0	0	1	0	0	1	0	0	0	0	0	0	0	1	1	0	1	0	0	0	0	0	0	0	1
CD	3	10.0209	3176631	---/CTG	-0.196755	4.55e-11	33	0	1	1	1	1	1	0	1	0	0	0	1	1	1	1	1	0	1	1	0	0	0	1	0	0	0
TL	3	11.7502	3510812	---/TAG	5.23943	3.74e-07	6	1	0	0	0	0	0	0	0	0	0	0	0	0	0	0	1	0	1	0	0	0	0	0	0	0	0
CL	3	11.7522	3511207	T/G	-2.74526	8.36e-08	25	0	0	0	0	1	0	0	0	0	0	0	0	0	0	0	0	1	0	0	0	0	0	0	0	0	1
TL	3	11.7522	3511207	T/G	-5.6739	1.77e-07	8	0	0	0	0	1	0	0	0	0	0	0	0	0	0	0	0	1	0	0	0	0	0	0	0	0	1
CL	3	13.6309	3874258	C/T	-2.45423	8.56e-11	16	0	0	1	0	1	1	0	0	0	0	0	0	0	0	0	0	1	0	0	0	0	0	0	0	1	0
TL	3	13.6309	3874258	C/T	-4.38396	3.2e-08	25	0	0	1	0	1	1	0	0	0	0	0	0	0	0	0	0	1	0	0	0	0	0	0	0	1	0
CL	3	14.8487	4109615	T/C	-1.78502	1.74e-11	47	0	1	1	0	1	0	1	0	1	0	0	0	1	0	0	0	0	0	0	1	1	0	0	0	1	0
CL	3	17.0069	4569174	C/T	-1.81748	2.57e-14	15	0	1	1	1	1	1	0	1	0	0	0	0	0	0	0	0	1	0	0	1	0	1	0	0	1	1
CL	3	17.5517	4685987	--/GG	-1.48148	7.17e-14	7	0	1	1	0	1	1	1	1	1	0	0	0	0	0	1	0	1	0	0	1	1	1	1	1	1	1
CD	3	18.9408	4983894	-----/TGCGG	0.34685	7.63e-07	5	0	0	0	0	0	0	0	0	0	0	1	0	0	0	0	0	0	0	0	0	0	0	0	1	0	0
CD	3	18.9419	4984130	C/T	0.315544	9.66e-08	8	0	0	0	0	0	0	0	0	0	0	1	0	1	0	0	0	0	0	0	0	0	0	0	1	0	0
ERN	3	20.3482	5385990	A/G	-0.136929	2.23e-07	6	1	0	0	0	0	1	1	0	0	0	0	0	0	1	0	0	0	1	1	0	0	0	1	0	0	0
ERN	3	28.0875	7555140	G/A	-0.100479	9.03e-07	5	1	0	1	0	0	1	1	1	0	0	0	0	1	1	1	0	1	1	1	0	0	1	1	0	0	0
TL	3	31.5943	8815186	T/C	-3.88417	5.16e-14	6	0	1	1	0	0	0	0	1	0	1	1	0	0	1	1	0	1	0	0	1	1	0	1	1	0	0
TL	3	32.8989	9300883	T/G	-6.87437	7.78e-08	5	0	0	0	0	0	0	0	0	0	0	1	0	0	0	0	0	1	0	0	0	0	0	0	0	0	0
TL	3	34.529	10012920	G/C	-3.78545	1.13e-15	44	0	1	0	0	1	1	0	0	0	1	1	0	1	1	1	0	1	0	0	0	1	1	1	1	1	0
TL	3	34.6273	10061956	A/-	4.74724	1.65e-10	22	1	0	0	0	0	0	1	0	0	0	1	0	0	0	1	0	0	1	0	0	0	0	0	0	0	1
TL	3	35.115	10305394	C/A	-5.4827	2.73e-07	10	0	0	0	0	0	0	0	1	0	0	0	0	0	1	0	0	1	0	0	0	0	0	0	0	0	0
TL	3	39.6848	12966225	T/C	-3.45344	7.14e-15	44	0	1	1	1	1	0	1	1	0	1	1	0	0	1	1	0	1	1	0	1	1	1	1	1	1	0
SL	3	45.6228	17558502	G/T	-3.97198	1.08e-16	98	0	1	1	1	1	0	1	1	1	0	1	0	0	1	0	0	0	0	0	0	0	0	1	1	0	0
TL	3	47.122	18717988	---/TTG	4.4209	2.76e-10	48	1	0	0	0	0	1	0	0	0	0	0	0	0	1	1	1	0	1	1	0	0	0	0	0	0	1
BN	3	48.1183	19488485	G/C	0.314601	1.03e-09	12	0	0	0	1	1	0	0	0	1	1	0	0	1	0	0	0	0	0	0	1	1	0	0	0	0	0
BN	3	48.1552	19517051	T/C	0.351304	4.31e-08	8	0	0	1	1	0	0	0	0	0	0	0	0	1	0	0	0	0	0	0	1	0	0	0	0	0	0
BN	3	48.3911	19699460	A/T	0.243758	1.8e-11	9	0	1	1	1	1	0	1	1	1	0	0	0	1	1	0	1	0	0	0	1	1	0	0	0	1	1
BZ	3	50.5105	21572411	----/ATTA	3.01278	1.05e-10	5	0	0	1	0	0	0	0	0	0	0	0	0	1	0	0	1	0	0	0	1	0	0	0	0	0	0
BZ	3	50.8088	22027780	A/G	1.98595	6.93e-11	9	0	1	0	1	1	0	0	1	0	1	0	0	1	0	0	1	0	0	1	0	0	0	0	1	0	1
BZ	3	50.9596	22257969	C/T	-2.65496	7.76e-11	13	1	0	0	0	0	0	0	0	0	0	0	0	0	0	0	0	1	1	0	0	0	1	1	0	1	0
BZ	3	51.1863	22604137	A/G	2.30663	7.65e-13	5	0	1	1	0	0	1	0	1	0	1	0	0	1	0	0	1	0	0	0	1	0	0	0	0	0	1
BZ	3	51.3528	22858335	G/A	-2.58929	2.54e-11	5	1	1	0	0	0	0	0	0	0	1	0	0	0	0	0	0	1	1	0	0	0	0	1	0	0	0
BZ	3	51.8009	23542360	G/A	2.47888	9.2e-13	5	1	0	1	1	0	0	0	0	0	0	0	0	1	0	0	1	0	0	0	1	1	0	0	0	0	1
TL	3	53.1443	27198284	G/C	3.13077	3.22e-07	5	0	0	1	1	1	1	0	0	0	0	0	0	0	0	1	1	0	0	0	1	0	0	0	0	0	1
BZ	3	53.1443	27198311	G/C	2.00349	2.05e-09	6	0	0	1	1	1	1	0	0	0	1	0	0	0	0	1	1	0	0	0	1	0	1	0	0	0	1
TL	3	53.1444	27198479	G/A	4.24764	9.13e-08	6	0	0	1	1	0	0	0	0	0	0	0	0	0	0	1	1	0	0	0	1	0	0	0	0	0	0
BZ	3	53.4014	27984212	----/GTCG	4.12044	1.11e-10	11	0	0	0	0	0	0	0	0	0	0	0	0	0	0	0	1	0	0	0	0	0	0	0	0	0	1
SL	3	53.7081	28567513	A/G	-3.94623	5.38e-07	8	0	0	1	0	0	0	0	1	0	0	0	0	0	0	0	0	0	0	0	0	0	0	0	1	1	0
BZ	3	55.0073	33359229	T/G	-2.54309	4.45e-11	5	0	0	0	0	0	1	0	1	0	0	0	0	0	1	0	0	1	1	0	0	0	1	1	0	0	0
BZ	3	55.0152	33426802	-/T	-2.10608	2.96e-15	5	1	0	0	0	0	1	0	0	1	1	1	0	1	1	0	0	1	1	0	0	0	0	1	1	1	0
SL	3	55.2056	35040706	C/T	-5.6095	1.52e-07	12	0	0	0	0	0	0	0	1	0	0	0	0	0	0	0	0	0	0	0	0	0	0	0	1	0	0
BZ	3	55.2196	35159987	--/TA	-2.36283	9.22e-13	5	0	0	0	0	0	1	0	0	0	1	1	0	0	0	1	0	1	1	0	0	0	1	1	0	0	0
BZ	3	55.2199	35162332	T/C	-2.70039	1.08e-13	42	0	0	0	0	0	1	0	0	0	1	1	0	0	0	0	0	1	0	0	0	0	1	1	1	0	0
TL	3	55.7524	40733394	G/A	-5.29421	2.15e-18	65	1	0	0	0	0	0	1	1	0	0	0	0	0	1	0	0	0	1	1	0	0	0	1	1	1	0
CD	3	56.0764	44800889	G/C	0.330505	6.52e-14	20	0	0	0	0	1	0	0	0	1	0	0	0	0	1	0	1	1	0	0	0	0	1	0	0	0	0
SL	3	56.7011	51190426	G/A	-3.62301	4.42e-09	9	1	0	1	0	0	0	0	1	0	0	0	0	0	0	0	0	0	0	1	0	0	0	0	1	1	0
TL	3	57.1584	53717868	G/C	-4.79698	5.56e-12	21	1	0	1	0	0	0	0	1	0	0	0	0	0	0	0	0	1	0	0	0	0	0	1	1	0	0
CL	3	57.7647	59869461	C/T	1.42297	3.76e-08	10	1	0	0	0	0	0	0	0	0	1	1	0	1	0	0	0	1	0	1	0	0	1	0	1	0	1
BN	3	57.7664	59918666	T/G	-0.422013	9.67e-13	8	0	0	1	0	0	1	0	0	0	0	0	1	0	0	0	0	0	1	0	0	0	0	1	0	0	0
CL	3	57.9066	64051654	T/C	1.48218	7.88e-08	5	1	0	0	0	0	1	0	0	0	0	1	0	1	0	0	0	0	0	1	0	0	1	0	1	0	1
BN	3	58.1069	69377731	G/T	-0.292371	1.87e-13	12	0	0	0	0	0	1	1	0	0	1	1	1	0	0	0	0	0	1	0	0	1	0	1	1	1	0
BN	3	58.1411	79691186	G/C	-0.433067	6.73e-13	6	0	0	0	0	0	1	0	0	0	1	0	0	0	0	0	0	0	0	0	0	0	0	1	1	0	0
BN	3	58.6227	106678902	C/-	-0.369094	7.55e-20	6	0	0	0	1	0	1	0	0	1	1	0	0	0	0	0	0	1	1	1	0	1	1	1	1	1	0
CD	3	58.7339	108297576	A/T	0.347428	2.35e-12	13	0	0	0	0	0	1	0	0	1	0	0	0	0	1	0	1	0	0	1	0	0	0	0	0	0	0
BN	3	58.9367	111143403	-/A	-0.350177	1.59e-16	18	0	0	1	0	0	1	0	0	1	1	1	0	0	0	0	0	0	1	0	0	1	1	0	0	1	0
CD	3	59.0015	111899832	C/T	0.348065	2.63e-09	14	0	0	0	0	0	0	0	0	0	0	0	0	0	0	0	1	1	0	1	0	0	0	0	0	0	0
BN	3	59.1534	113671349	G/A	-0.365216	2.45e-09	7	0	0	0	0	0	1	0	0	0	0	1	0	0	0	0	0	0	0	0	0	0	1	1	1	0	0
BZ	3	59.4836	117522204	A/G	-2.1833	5.05e-14	9	0	0	0	0	0	1	1	1	0	1	1	1	0	0	0	0	1	0	0	0	0	1	1	1	1	0
BN	3	59.5498	118293823	T/C	-0.319281	4.13e-12	6	0	0	0	0	0	1	1	0	0	1	1	1	0	0	0	0	1	1	0	0	0	0	1	0	0	0
CD	3	59.5996	118875796	G/A	0.305895	7.8e-12	5	0	0	0	0	0	0	1	0	0	0	0	1	0	0	0	1	1	0	1	0	0	0	0	0	0	0
CD	3	60.4874	123726322	-/T	0.525452	4.59e-17	17	0	0	0	0	0	0	0	0	1	0	0	0	0	1	0	0	0	0	0	0	0	1	0	0	0	0
CD	3	60.8501	125704867	T/C	0.41315	3.76e-17	48	0	0	0	0	0	0	1	0	1	0	0	0	0	1	0	0	0	0	0	0	1	1	0	0	0	0
BN	3	60.9815	127348834	C/T	-0.356463	6.5e-14	7	0	0	0	0	0	1	0	0	0	1	1	1	0	0	0	0	0	0	0	0	0	1	1	1	1	0
ERN	3	61.4322	130898997	G/A	-0.227588	2.68e-08	35	0	1	0	1	0	0	0	0	0	0	1	0	0	0	0	0	0	0	0	0	0	0	0	0	0	0
BZ	3	62.9137	135901927	G/A	-2.74448	2.2e-10	9	0	0	0	0	0	0	1	0	0	0	1	0	0	0	0	0	1	0	0	0	0	1	0	0	1	0
BZ	3	62.9425	136037812	C/T	4.7785	8.32e-13	5	0	0	0	0	0	0	0	0	0	0	0	0	0	0	0	1	0	0	0	0	0	0	0	0	0	1
BN	3	62.9427	136038573	A/C	-0.514027	4.82e-24	5	0	0	0	0	0	1	0	0	0	0	1	0	0	1	0	0	1	0	0	0	0	1	0	0	1	0
BZ	3	62.9427	136038573	A/C	-3.50094	7.05e-20	10	0	0	0	0	0	1	0	0	0	0	1	0	0	1	0	0	1	0	0	0	0	1	0	0	1	0
BN	3	62.9624	136131867	C/T	-0.40327	1.06e-19	32	1	0	0	0	0	1	0	0	0	0	1	1	0	1	0	0	1	0	1	0	0	1	0	0	1	0
BZ	3	63.9175	141153112	G/A	-4.95675	8.72e-15	9	0	0	0	0	0	0	0	0	0	0	0	0	0	0	0	0	1	0	0	0	0	1	0	0	0	0
BZ	3	64.0529	142390769	C/T	4.68035	1.08e-12	18	0	0	0	0	0	0	0	0	0	0	0	0	1	0	0	0	0	0	0	0	0	0	0	0	0	1
BZ	3	64.0972	142795789	G/A	-2.4032	1.47e-13	5	1	0	0	0	0	0	1	0	0	0	1	0	0	1	0	0	1	0	0	0	1	1	0	1	0	0
BZ	3	64.0997	142818042	C/T	-2.37559	3.99e-11	16	1	0	0	0	0	0	1	0	0	0	1	0	0	1	0	0	1	0	0	0	0	1	0	1	0	0
BN	3	64.494	143191149	G/T	-0.381516	1.17e-08	5	0	0	0	0	0	0	0	0	0	0	0	1	0	0	1	0	0	0	0	0	0	1	1	0	0	0
BN	3	65.4748	145180761	G/C	-0.307069	1.13e-20	5	1	0	1	0	0	1	1	0	1	1	1	0	1	1	1	1	1	1	1	0	0	1	1	0	1	0
BN	3	66.3956	147968562	-/A	-0.404552	1.06e-18	38	0	0	0	0	1	1	0	0	0	0	1	1	0	1	0	0	1	0	1	0	0	0	1	0	0	0
BN	3	66.4992	148263260	G/C	-0.471339	1.01e-19	16	0	0	0	0	0	1	0	0	0	0	1	0	0	0	0	0	1	0	1	0	0	1	1	0	0	0
CD	3	68.6023	154636788	T/A	-0.227335	1.13e-14	16	1	1	0	1	0	0	0	0	0	1	1	1	1	1	1	0	0	1	0	0	1	1	1	0	1	0
SL	3	68.8061	155273477	GCA/---	-3.37512	1.82e-07	12	1	0	0	0	0	0	0	1	0	1	0	0	0	0	0	0	0	0	0	0	0	0	0	1	0	1
CD	3	69.9521	157054162	G/A	-0.219267	8.25e-15	21	1	1	0	0	0	1	0	1	0	1	0	1	1	1	0	0	0	0	1	0	1	1	1	1	1	0
CD	3	70.4536	157530657	T/G	-0.340583	1.23e-11	5	0	1	0	0	1	0	0	0	0	0	0	0	1	0	0	0	0	0	0	0	1	0	0	0	0	0
ERN	3	71.5425	158606213	G/A	-0.1386	3.91e-08	14	1	1	0	1	1	1	0	0	0	0	0	0	1	0	0	0	0	0	1	0	0	1	1	1	0	1
ERN	3	73.3023	160432643	G/A	-0.212776	2.26e-08	5	1	1	0	1	0	0	0	0	0	0	0	0	1	0	0	0	0	0	0	0	0	0	0	0	0	0
CD	3	73.6809	160843695	G/A	-0.272581	3.09e-13	18	1	1	0	0	0	1	0	0	0	1	0	0	1	0	1	0	0	0	1	0	0	0	1	0	0	0
ERN	3	73.7495	160918155	G/A	0.126389	8.41e-08	5	0	0	1	0	1	0	1	1	0	1	0	0	0	1	0	1	1	1	0	1	0	0	0	1	1	0
CD	3	74.1664	161370803	C/A	-0.231083	9.69e-13	6	1	1	0	1	1	1	0	1	1	1	1	1	1	1	1	0	0	1	1	1	1	1	1	1	1	1
SL	3	75.6426	164299837	-/T	3.43528	1.2e-07	6	0	0	0	0	0	1	0	0	0	0	0	1	0	0	0	1	0	0	1	0	0	0	1	0	0	0
ERN	3	75.6544	164324394	C/A	-0.188176	2.69e-20	50	0	1	1	1	1	1	0	0	1	1	0	0	1	1	0	0	0	0	1	1	0	1	1	1	0	0
BZ	3	75.7795	164583713	G/C	2.5605	1.51e-11	11	0	1	0	1	0	0	0	1	0	0	0	0	0	1	0	0	0	0	0	1	0	0	0	0	1	1
BZ	3	75.7797	164584182	G/C	3.54958	1.65e-12	6	0	0	0	1	0	0	0	1	0	1	0	0	0	0	0	0	0	0	0	0	0	0	0	0	0	1
BZ	3	75.7799	164584645	T/C	3.12085	1.68e-12	11	0	1	0	1	0	0	0	1	0	1	0	0	0	0	0	0	0	0	0	0	0	0	0	0	0	1
BZ	3	75.7801	164585042	A/T	2.8615	1.31e-13	6	0	1	0	1	0	0	0	1	0	1	0	1	0	0	0	1	0	0	0	0	0	0	0	0	0	1
ERN	3	75.9551	164882051	G/A	-0.145135	2.61e-08	16	1	1	0	0	0	1	0	0	0	1	1	1	0	1	0	0	0	0	1	0	1	1	1	0	0	0
BZ	3	76.3201	165202782	T/C	3.8472	7.33e-12	26	0	0	0	0	0	0	0	1	0	0	0	0	0	0	0	0	0	0	0	1	0	0	0	0	0	1
ERN	3	78.5237	167404968	G/A	-0.177949	2.29e-22	38	1	1	1	1	0	1	0	0	1	1	1	1	1	1	1	0	0	0	1	1	1	1	1	1	0	0
ERN	3	78.5305	167414136	G/C	-0.218321	3.9e-09	6	1	1	0	0	0	0	0	0	0	0	1	0	0	0	0	0	0	0	0	0	0	1	0	0	0	0
ERN	3	80.0376	169019866	G/A	-0.155493	3.74e-07	6	1	0	0	0	0	0	0	0	0	0	1	1	0	1	0	0	0	0	1	0	0	1	0	0	0	0
BN	3	81.6256	170677814	A/G	0.3141	1.05e-14	6	1	1	0	0	0	0	0	1	0	1	0	0	0	0	0	0	1	1	1	0	0	1	0	1	1	1
SL	3	81.7573	170868459	A/G	-3.54905	9.69e-09	12	0	0	0	0	0	0	0	1	0	1	0	0	0	0	0	0	0	1	0	0	1	0	0	1	1	0
BN	3	83.465	173203984	C/T	0.308298	1.45e-16	5	1	1	0	1	1	0	1	1	0	1	1	0	0	1	0	1	0	1	0	1	0	0	0	0	1	1
BN	3	84.2414	174125140	C/T	0.375973	9.28e-14	7	0	0	0	0	0	0	1	1	0	0	0	0	1	0	0	0	0	1	0	1	0	0	0	0	1	1
BN	3	84.8752	174738122	C/T	0.293194	1.14e-13	36	1	1	0	0	0	0	1	1	0	1	1	1	0	0	1	0	0	1	0	1	1	1	1	0	1	1
BZ	3	87.5262	176544299	A/C	2.23265	7.24e-19	11	1	1	1	1	0	1	0	1	1	1	1	1	1	0	1	1	1	1	0	1	1	0	0	0	0	1
BZ	3	87.5811	176581694	------/TGAACA	3.01716	4.12e-13	6	0	1	1	0	0	0	0	1	0	0	0	1	0	0	0	1	0	1	0	0	0	0	0	0	0	1
BZ	3	87.6933	176658137	G/-	2.00678	2.83e-11	40	0	1	1	1	1	0	1	1	1	1	0	0	1	0	0	0	1	1	0	1	1	0	0	0	0	1
BN	3	87.9266	176817141	A/G	0.586556	1.11e-11	12	0	0	0	0	0	0	1	1	0	0	0	0	0	0	0	0	0	0	0	0	0	0	0	0	0	1
BN	3	88.284	177060625	G/C	0.31383	2.14e-17	5	1	1	1	1	1	1	1	1	1	0	0	1	1	1	0	0	0	1	0	1	1	0	0	0	1	1
BZ	3	88.8348	177435870	T/A	2.37936	1.54e-11	17	0	1	0	0	0	0	0	0	0	0	0	1	1	1	1	0	0	1	0	1	0	0	1	0	0	1
BZ	3	88.9247	177497127	T/C	3.17097	7.43e-21	28	0	1	0	0	0	0	1	0	0	1	0	1	1	1	0	1	0	1	0	0	0	0	0	0	0	1
CL	3	89.2242	177701153	-----/CGCTG	-3.06448	6.87e-08	5	0	0	0	0	0	0	0	0	0	0	0	0	0	0	0	0	1	1	0	0	0	0	0	0	0	0
CL	3	89.2242	177701165	A/T	-3.19685	1.49e-08	14	0	0	0	0	0	0	0	0	0	0	0	0	0	0	0	0	1	1	0	0	0	0	0	0	0	0
BZ	3	89.6102	177964190	------/CCGCCC	3.68286	3.13e-13	6	0	1	0	0	0	0	0	0	0	0	0	0	0	0	0	1	0	1	0	0	0	0	0	0	0	1
BZ	3	90.1094	178779790	T/G	2.89321	3.44e-16	13	0	1	0	1	0	0	1	0	0	1	0	0	0	0	1	1	0	1	0	0	0	0	0	0	0	1
BN	3	90.1621	178812830	A/G	0.298118	1.93e-15	5	1	1	1	0	0	1	1	1	0	1	0	0	0	1	1	0	0	0	1	1	1	0	0	1	1	1
BN	3	90.1621	178812857	G/A	0.295175	4.74e-10	7	0	1	1	0	0	1	1	1	0	1	0	0	0	1	1	0	0	0	0	0	0	0	0	0	0	1
BN	3	90.4532	178995275	A/G	0.305047	4.65e-22	6	1	1	1	1	1	1	1	1	1	1	0	1	1	1	1	1	0	1	1	1	1	0	1	1	1	1
BN	3	90.4551	178996457	--/AA	0.353054	9.23e-27	45	0	1	1	1	1	1	1	1	1	1	0	1	1	1	1	1	0	1	0	1	1	0	1	0	1	1
BN	3	90.9511	179307261	G/C	0.393577	3.18e-08	14	0	1	0	0	0	0	1	1	0	0	0	0	0	0	0	0	0	0	0	0	0	0	0	0	0	1
BN	3	92.0288	179982665	G/A	0.278187	3.59e-14	9	1	1	1	1	1	1	1	1	1	1	1	1	1	0	1	0	0	1	1	1	0	0	0	0	1	1
SL	3	94.1045	182082237	T/A	-3.08829	1.9e-13	9	1	0	0	0	1	0	1	1	0	1	0	0	1	1	0	0	1	1	1	1	1	1	0	0	1	1
SL	3	94.2548	182256229	T/C	-3.0627	8.6e-19	6	1	1	1	0	1	1	1	1	0	1	1	1	1	1	1	0	1	1	1	1	1	1	1	1	1	1
SL	3	94.308	182317852	T/C	-3.09176	2.64e-14	9	0	0	1	1	1	0	1	1	0	1	0	1	1	1	1	0	1	1	0	0	1	0	1	1	0	0
BN	3	94.483	182520439	----/CCCA	0.369921	1.7e-18	8	0	1	1	0	1	1	1	1	0	1	0	0	0	0	1	0	0	1	0	0	1	0	0	0	1	1
SL	3	94.483	182520439	----/CCCA	-3.19932	7.56e-13	29	0	1	1	0	1	1	1	1	0	1	0	0	0	0	1	0	0	1	0	0	1	0	0	0	1	1
BN	3	94.602	182658133	A/G	0.328641	2.05e-16	19	1	1	0	0	0	0	1	1	0	1	0	1	1	0	1	1	0	1	1	0	0	0	1	0	1	1
SL	3	94.8365	182929607	TCG/---	-3.6288	1.79e-14	9	0	1	0	0	0	0	1	1	0	0	0	1	1	0	1	0	0	1	0	1	1	1	0	0	0	1
SL	3	94.8369	182930139	--/TC	-3.254	8.1e-11	8	0	0	1	0	0	0	1	1	0	0	0	1	1	0	0	0	0	1	0	1	1	1	0	0	0	1
CL	3	97.211	185615782	C/G	-3.01848	1.82e-10	38	0	0	0	0	0	0	0	0	0	0	0	0	0	0	1	0	1	1	0	0	0	0	0	0	0	0
CL	3	99.915	189565152	T/C	1.59729	7.01e-08	5	0	0	0	1	0	1	0	0	0	0	0	0	0	0	1	1	1	1	0	1	0	1	0	0	0	1
TL	3	100.534	190930881	G/A	-3.3221	1.4e-08	45	1	0	0	0	0	0	1	0	0	0	1	0	1	0	0	0	1	0	1	0	1	1	0	1	0	0
CL	3	103.313	195584896	C/A	1.98259	8.34e-09	5	0	0	0	1	0	1	1	0	0	1	0	0	0	0	0	0	0	0	0	0	0	0	0	0	0	1
CD	3	104.636	197459730	T/G	0.258207	2.87e-11	5	0	0	0	0	0	0	0	0	1	0	1	0	0	1	1	0	0	0	0	1	1	0	0	1	0	0
CD	3	105.19	198013662	A/G	0.233818	2.19e-12	16	1	1	0	0	0	0	0	0	1	0	1	0	0	0	1	0	1	0	1	1	1	1	0	0	0	0
CD	3	106.478	199350379	T/C	0.237003	3.2e-15	16	0	0	1	1	1	0	0	0	1	1	0	0	0	0	1	1	0	0	1	1	1	1	1	0	1	0
ERN	3	106.837	199507600	A/G	-0.200397	4.54e-13	84	0	1	0	0	1	1	0	1	0	0	0	0	0	1	0	1	0	0	1	0	0	0	0	0	0	0
CD	3	106.916	199542458	C/T	0.376388	1.55e-12	5	0	0	0	0	0	0	0	0	0	0	1	0	0	0	1	0	0	0	0	1	0	0	0	1	0	0
CD	3	107.387	199749130	G/A	0.547867	6.45e-14	5	0	0	0	0	0	0	0	0	0	0	0	0	0	0	1	0	0	0	0	1	0	0	0	0	0	0
TL	3	108.197	200707763	G/T	-2.98957	2.76e-07	7	1	0	0	0	1	0	1	0	0	0	1	1	1	0	1	1	1	1	1	0	1	1	0	1	0	1
TL	3	110.233	202857062	G/T	7.11523	7.09e-12	41	0	0	0	0	0	0	0	0	0	0	1	0	0	0	0	1	0	0	0	0	0	1	0	0	0	0
ERN	3	111.254	203360117	T/C	0.272852	2.37e-07	7	0	0	0	0	0	0	0	0	0	0	0	0	0	0	1	0	0	0	0	0	0	0	0	1	0	0
ERN	3	111.331	203420045	G/C	0.285751	6.41e-08	17	0	0	0	0	0	0	0	0	0	0	0	0	0	0	1	0	0	0	0	0	0	0	0	1	0	0
TL	3	111.401	203474526	T/G	-4.4288	5.69e-07	7	0	0	0	0	0	0	1	0	0	0	0	1	1	0	1	0	0	0	0	0	0	0	0	0	0	1
TL	3	111.966	203913208	T/C	4.65755	7.89e-27	100	0	1	1	1	0	1	1	1	1	0	1	1	1	0	1	1	1	1	1	1	0	0	0	1	0	1
SL	3	112.924	204657216	T/C	2.43813	2.93e-10	6	1	1	0	1	1	1	0	0	1	1	1	1	0	1	1	1	1	1	1	1	0	0	1	0	1	1
SL	3	113.203	204873639	A/G	2.74731	5.6e-09	5	0	1	0	1	1	1	1	0	1	1	1	0	0	1	1	1	1	0	0	0	0	1	1	0	1	1
ERN	3	113.208	204877769	T/C	0.300675	5.99e-08	6	0	0	0	0	0	0	0	0	0	0	0	0	0	0	1	0	1	0	0	0	0	0	0	0	0	0
SL	3	113.647	205218484	C/G	2.13935	1.06e-07	5	1	1	1	1	0	1	1	0	1	0	1	1	1	0	1	1	0	1	1	1	0	1	0	1	1	0
ERN	3	113.911	205423108	---/TAC	0.286581	8.98e-08	7	0	0	0	0	0	0	0	0	0	0	0	0	0	0	1	0	0	0	0	0	0	0	0	1	0	0
CD	3	114.439	205832939	G/A	-0.188968	1.55e-08	5	1	1	0	1	1	1	0	0	0	1	1	1	0	0	0	0	1	1	0	1	1	1	0	1	1	1
CD	3	115.565	206707685	A/C	-0.246535	3.19e-10	6	0	0	0	1	0	1	0	1	0	0	0	1	1	0	0	0	0	1	0	1	0	0	0	1	1	1
SL	3	116.663	207318203	-------/TAAGCAT	4.32369	6.2e-22	11	1	0	0	1	0	1	0	1	1	0	1	0	0	0	0	1	0	0	1	1	0	1	0	0	0	1
CD	3	116.967	207468982	T/A	-0.316131	5.91e-13	6	0	1	0	0	0	1	0	0	0	0	0	1	1	1	0	0	0	0	0	0	0	0	0	0	1	0
CD	3	116.968	207469293	G/T	-0.31861	3.41e-12	7	0	1	0	0	0	1	0	0	0	0	0	1	1	0	0	0	0	0	0	0	0	0	0	0	1	0
CD	3	117.095	207532342	G/C	-0.30711	1.63e-14	6	0	0	1	0	0	1	0	0	0	1	0	1	1	0	0	0	0	1	0	1	0	0	0	0	0	1
TL	3	117.441	207704104	A/G	4.76675	7.5e-10	10	0	0	0	0	0	1	0	1	0	0	1	0	0	0	0	1	1	0	0	0	0	1	0	0	0	0
SL	3	117.577	207771778	G/A	5.04279	1.23e-11	19	0	0	0	1	0	0	0	0	0	0	1	0	0	0	0	1	1	0	0	0	0	1	0	0	0	0
SL	3	117.903	207933577	T/C	4.41237	1.66e-13	7	0	0	0	1	0	1	0	1	0	0	1	0	0	0	0	1	1	0	0	0	0	1	0	0	0	0
SL	3	117.904	207933604	A/C	4.23629	1.01e-16	61	0	0	0	1	0	1	0	1	1	0	1	0	0	0	0	1	1	0	0	0	0	1	0	0	0	1
CD	3	118.215	208087968	G/A	-0.284959	1.57e-13	16	0	0	0	1	1	0	0	0	0	1	0	1	1	1	0	0	0	0	0	0	0	0	0	0	1	1
CD	3	118.529	208291416	C/T	-0.205561	1.96e-11	8	1	1	1	0	0	0	0	1	0	0	0	1	1	1	0	0	1	1	0	0	1	0	1	0	1	1
BN	3	118.749	208481076	C/T	0.420222	1.42e-08	6	1	0	0	0	0	0	0	1	0	0	0	0	0	0	0	0	0	0	0	0	1	0	0	0	0	0
BN	3	119.655	209261099	C/T	0.267335	1.25e-14	14	1	1	0	0	1	0	0	1	1	1	1	1	0	1	1	0	1	1	0	0	1	1	1	1	1	1
BZ	3	121.255	210606736	T/A	2.01646	7e-10	5	1	1	0	0	0	1	0	1	0	0	0	0	0	1	0	0	1	0	0	1	1	0	0	0	0	0
CL	3	121.384	210709982	G/T	-2.61017	1.25e-08	5	0	0	0	0	0	0	0	0	0	0	0	0	0	0	1	0	0	1	0	0	0	0	0	0	1	0
CD	3	121.909	211130671	T/G	-0.204337	3.18e-10	9	0	0	0	1	1	1	1	1	0	1	0	1	1	1	0	0	1	0	0	1	1	0	0	0	1	1
TL	3	121.973	211182122	G/A	4.43058	1.41e-08	6	0	0	0	1	0	0	0	1	0	0	1	0	0	0	0	0	0	0	0	0	0	1	0	0	1	0
CL	3	122.808	211850975	G/-	-2.80457	1.87e-09	37	0	0	0	0	1	0	0	0	1	0	0	0	0	0	0	0	0	0	0	0	0	0	0	0	1	0
BN	3	123.29	212237481	C/G	0.281309	4.12e-11	17	0	0	0	0	0	0	0	1	1	1	0	1	0	1	1	0	0	0	0	0	1	0	0	1	1	1
BN	3	123.305	212249640	T/G	0.375238	1.18e-31	15	1	1	0	0	1	0	0	1	1	1	1	1	1	1	1	1	1	0	1	1	1	1	1	1	1	1
CL	3	123.458	212372085	C/T	-3.27062	1.31e-08	6	0	0	0	0	1	0	0	0	0	0	0	0	0	0	0	0	0	0	0	0	0	0	0	0	1	0
BN	3	123.458	212372178	A/G	0.302919	4.58e-18	11	1	0	0	0	1	0	1	0	0	1	1	1	1	0	0	0	1	0	1	0	1	1	1	1	1	1
BN	3	123.461	212374786	A/G	0.326855	3.32e-19	45	1	0	0	0	1	0	1	0	0	1	1	0	1	0	0	0	1	0	1	0	1	1	1	1	1	1
CD	3	123.629	212508883	C/T	-0.407878	4.74e-11	6	1	0	0	0	0	0	0	0	0	0	0	1	0	0	0	0	0	0	0	0	0	0	0	0	0	1
CD	3	124.436	212944358	A/C	-0.185393	1.86e-11	26	1	1	1	1	1	1	1	1	1	1	0	1	1	1	0	1	1	1	0	1	0	0	0	0	1	1
CD	3	125.007	213176981	T/C	-0.173488	2.68e-08	6	0	1	1	1	1	1	0	1	0	1	0	1	0	1	0	0	0	1	0	1	1	0	0	0	1	1
BN	3	125.372	213325340	A/T	0.34904	2.44e-10	27	0	0	0	0	0	0	0	0	0	0	0	0	0	1	1	0	0	0	0	0	1	0	0	1	1	1
CL	3	126.671	213854269	----/TATA	-1.69183	1.2e-08	5	0	1	0	0	1	0	0	0	0	1	0	0	0	1	1	0	0	1	0	0	0	0	0	0	1	0
BN	3	128.186	214669939	T/C	0.439428	1.03e-09	5	1	0	0	0	0	0	0	0	0	0	0	0	0	0	0	0	0	0	0	0	1	0	0	0	0	1
CL	3	128.197	214678939	T/C	-1.70939	8.4e-11	5	0	0	1	0	1	0	0	1	0	0	1	0	0	0	0	1	1	1	0	0	0	0	0	1	1	0
ERN	3	131.116	215995316	A/G	-0.147867	1.33e-07	33	0	0	1	0	0	1	0	0	0	1	0	0	1	1	0	1	0	0	0	0	0	0	1	1	0	1
ERN	3	131.134	215997355	G/A	-0.138489	4.83e-13	92	1	1	1	1	1	1	1	1	1	1	1	1	1	1	1	1	1	0	0	0	0	1	0	0	0	1
BZ	3	131.653	216135795	A/G	2.99866	3.38e-11	5	0	0	0	0	0	0	0	1	0	1	0	0	0	0	0	0	0	0	0	0	1	0	0	0	0	1
BZ	3	131.653	216135825	A/G	3.37884	1.24e-10	5	0	0	0	0	0	0	0	1	0	1	0	0	0	0	0	0	0	0	0	0	1	0	0	0	0	0
CL	3	132.068	216312342	C/T	1.67101	1.83e-08	10	0	1	0	1	0	1	0	0	1	0	0	0	1	0	0	0	0	0	0	1	0	0	0	0	0	1
CL	3	132.068	216312492	C/G	-2.40806	7.33e-10	6	0	0	0	0	1	0	0	0	0	1	0	0	0	0	1	0	1	0	0	0	0	0	0	0	0	0
ERN	3	132.794	216621884	-/G	-0.223387	2.62e-07	5	0	0	1	0	0	0	0	0	0	0	0	0	1	0	0	1	0	0	0	0	0	0	0	0	0	0
CL	3	132.828	216723980	-----/CTTCC	1.47811	1.49e-09	8	0	0	1	1	0	1	1	0	0	0	0	0	1	0	0	0	0	1	0	1	1	1	0	0	0	1
BZ	3	132.911	217015218	G/A	4.01024	1.67e-10	18	0	0	0	0	0	0	0	1	0	0	0	0	0	0	0	0	0	0	0	0	1	0	0	0	0	0
BZ	3	133.563	217608009	-/C	3.85108	1.52e-09	5	0	0	0	0	0	0	0	0	0	0	0	0	0	1	0	0	0	0	0	0	1	0	0	0	0	0
BN	3	133.711	217681213	C/G	-0.233032	1.45e-09	5	0	1	0	1	1	1	1	0	1	0	1	0	1	0	0	1	0	1	0	1	0	0	0	0	0	0
CL	3	134.36	218001607	A/G	-1.87617	4.04e-09	9	0	0	0	0	1	0	0	0	0	1	1	0	0	0	0	0	1	0	0	0	0	0	0	1	1	0
ERN	3	135.876	219129685	-------/GGCCCTG	-0.144741	9.66e-08	12	0	0	1	1	0	1	1	0	0	1	1	0	1	1	0	1	0	0	0	0	1	0	0	0	0	1
BZ	3	135.877	219130562	C/T	2.25207	5e-08	5	0	0	0	0	0	1	1	0	0	0	0	0	0	1	0	0	1	0	0	1	0	0	0	0	0	0
BZ	3	136.071	219283961	T/C	4.08009	2.43e-10	8	0	0	0	0	0	0	0	1	0	0	0	0	0	0	0	0	0	0	0	0	1	0	0	0	0	0
CL	3	136.485	219610827	C/A	1.46161	1.31e-07	5	0	0	0	1	0	0	1	1	1	0	0	0	0	0	0	0	0	0	0	1	1	1	0	0	0	1
BN	3	136.624	219721376	C/T	0.493798	5.82e-09	8	0	0	0	0	0	0	0	0	0	0	0	0	0	0	0	0	0	0	0	0	1	0	0	0	0	1
BZ	3	136.809	219864207	T/C	1.94482	1.25e-12	6	1	1	0	0	1	1	1	1	1	1	0	0	1	1	0	0	0	0	0	1	1	1	1	0	0	1
BZ	3	137.356	220108404	T/G	1.84138	1.05e-08	6	0	0	0	0	0	1	1	0	0	1	0	0	0	1	0	0	1	0	0	0	1	0	1	1	0	0
BZ	3	137.378	220118515	-------/CGGTTGG	-1.95766	6.27e-08	5	1	0	1	0	1	0	0	0	1	0	0	0	1	0	0	1	0	0	1	0	0	1	0	0	0	0
CD	3	145.255	223634623	T/C	-0.178218	6.64e-08	5	0	0	1	1	0	0	0	0	0	1	0	0	1	1	1	0	1	1	0	0	0	0	0	0	0	1
BN	3	147.01	224315698	C/A	0.457285	6.83e-08	10	0	0	0	0	0	0	0	0	0	0	0	0	0	0	0	0	0	0	0	0	1	0	0	0	0	1
SL	3	148.471	225228365	C/T	3.79998	3.51e-07	10	0	0	0	1	0	0	0	0	0	1	1	0	0	0	0	0	0	0	0	0	0	0	0	1	0	0
SL	3	150.11	226252188	A/G	2.53496	6.55e-07	5	0	0	0	0	0	0	0	0	0	1	1	0	0	0	0	0	1	0	1	0	0	1	1	1	1	1
SL	3	151.096	226867578	C/T	3.47976	2.06e-07	9	0	0	0	1	0	0	0	0	0	1	1	0	0	0	0	0	0	0	0	0	0	0	1	1	0	0
ERN	4	5.77258	1661754	----/ACAG	-0.259055	7.19e-09	15	0	0	0	0	0	0	0	1	0	0	0	0	0	0	0	1	0	0	0	1	0	0	0	0	0	1
ERN	4	7.01324	2025767	A/C	-0.138244	7.35e-09	7	1	0	0	1	1	0	0	0	0	1	0	0	0	0	0	1	1	1	1	1	0	1	1	1	0	1
TL	4	7.65792	2214919	G/A	2.47939	8.37e-09	10	1	1	1	0	1	0	1	1	1	0	1	1	1	0	1	0	1	1	0	0	1	1	0	1	1	1
TL	4	7.65793	2214920	A/T	2.68596	6.25e-10	28	1	1	1	0	1	0	1	1	1	0	1	1	1	0	1	0	1	1	0	0	1	1	0	1	1	1
TL	4	7.65939	2215348	C/G	2.53803	5.31e-09	25	1	1	1	0	0	0	1	0	1	0	1	1	1	1	1	0	1	1	0	1	1	1	0	1	1	1
ERN	4	8.93211	2588768	T/-	-0.260999	2.15e-10	40	0	0	0	1	0	0	0	1	0	0	0	0	0	1	0	1	0	0	0	0	0	0	0	0	0	0
TL	4	9.84738	2857313	T/G	2.29495	5.41e-10	7	1	1	0	1	1	0	1	1	1	0	1	1	1	1	1	1	1	1	1	1	1	1	1	1	1	1
ERN	4	11.2725	3275438	C/T	-0.26422	2.76e-08	13	0	0	0	0	0	0	0	1	0	0	0	0	0	0	0	1	0	0	0	0	0	0	0	0	0	1
ERN	4	11.7616	3418960	G/T	-0.168578	1.39e-15	12	0	0	0	1	1	0	0	1	1	0	0	1	1	1	0	1	0	0	1	1	1	1	0	0	0	1
TL	4	14.4781	4215989	G/C	2.98932	9.47e-09	7	1	0	0	1	1	0	1	1	1	0	0	1	0	0	0	0	0	1	1	1	0	1	0	0	0	0
ERN	4	18.4106	5369790	G/C	-0.119003	2.42e-08	23	1	0	0	1	1	0	0	1	0	1	0	1	0	1	0	1	0	1	1	1	1	0	1	0	1	1
ERN	4	18.4174	5371767	T/A	-0.123241	2.4e-09	18	1	1	0	1	1	0	0	1	1	1	0	1	0	0	0	1	0	0	1	1	1	0	1	0	1	1
CD	4	19.4924	5696107	G/T	0.235195	1.81e-07	12	0	0	1	0	0	0	1	0	0	0	0	0	1	0	0	0	0	1	0	0	1	0	0	0	0	0
BZ	4	20.2169	5978587	G/C	1.26816	6.34e-08	21	1	1	0	1	1	0	0	1	0	0	1	1	0	1	1	1	0	0	1	1	0	1	0	1	1	0
CD	4	21.6826	6516273	C/T	-0.320928	3.17e-09	8	0	0	0	0	0	0	0	1	0	1	0	0	0	0	0	1	1	0	0	0	0	0	0	0	0	0
CD	4	23.9374	8162703	T/G	-0.183471	2.39e-14	63	1	1	0	1	1	0	1	1	1	1	0	1	0	1	0	1	1	1	1	1	1	1	1	1	0	1
CD	4	25.8998	9733494	T/C	-0.169128	1.92e-12	8	0	1	0	1	1	0	1	1	1	1	0	0	0	1	0	1	1	1	1	1	1	1	1	0	1	1
CD	4	26.2408	9829038	--/TC	-0.212366	2.37e-13	5	0	1	0	1	0	1	0	0	0	1	0	0	0	1	0	1	1	1	1	1	1	0	1	0	0	1
CL	4	30.946	11146340	A/T	2.60633	7.15e-09	5	0	0	0	0	0	0	0	1	0	0	0	0	0	0	0	0	0	0	0	1	0	0	0	0	1	0
CL	4	30.9461	11146381	C/G	2.32057	2.29e-07	5	0	0	0	0	0	0	0	1	0	0	0	0	0	0	0	0	0	0	0	1	0	0	0	0	1	0
CD	4	41.8967	18486137	G/A	-0.203696	1.13e-07	7	1	0	0	1	1	0	0	0	0	0	0	1	0	1	0	0	1	1	1	0	1	0	0	0	0	0
CD	4	43.8695	20040761	T/C	-0.203219	2.95e-09	21	1	0	0	1	1	1	0	0	1	1	0	0	0	1	1	0	1	1	1	0	0	0	1	0	0	0
CD	4	44.5099	20772654	T/G	-0.208434	9.3e-12	5	1	0	1	1	1	1	0	1	1	1	0	1	0	1	1	0	0	1	1	1	1	0	1	0	1	0
CD	4	44.7254	21022763	T/C	-0.192011	2.66e-10	7	1	0	1	1	1	1	0	1	1	1	0	1	0	1	1	0	0	1	1	1	1	0	1	0	1	0
SL	4	47.3539	24073558	T/C	-2.16603	4.32e-08	19	1	1	0	1	1	1	0	0	0	1	0	1	1	1	0	1	1	1	1	1	1	0	1	0	1	1
SL	4	47.7297	24551359	C/T	-2.03582	8.4e-08	5	1	1	0	1	1	1	0	1	0	1	0	1	1	1	0	1	1	1	1	1	1	1	1	0	1	1
TL	4	47.7436	24586907	C/T	-3.273	8.57e-14	5	0	1	1	0	1	1	1	1	1	1	0	1	0	1	0	1	1	1	0	1	1	1	1	0	1	1
TL	4	48.1607	25656230	A/G	-3.55444	2.25e-13	5	0	0	1	1	1	1	1	0	0	1	0	1	0	1	0	1	1	1	1	1	1	1	1	0	0	0
TL	4	48.1634	25663081	A/G	-3.24105	3.08e-11	8	0	0	1	1	1	1	1	0	0	1	0	1	0	1	0	1	1	1	1	1	1	1	1	0	0	0
TL	4	48.2344	25845246	C/T	-3.42834	1.1e-13	33	0	0	1	1	1	1	1	1	0	1	0	1	1	1	0	1	1	1	1	1	1	1	1	0	1	1
TL	4	48.584	26741514	T/A	-3.29193	4.81e-12	13	1	1	0	1	0	1	0	1	0	0	0	1	0	1	0	1	1	1	1	1	1	1	1	0	0	1
SL	4	50.1258	30185416	A/G	-2.68135	8.5e-09	6	0	0	0	1	0	1	1	0	0	1	0	1	0	1	0	0	1	0	1	1	1	0	1	0	0	1
CL	4	50.4685	30823754	G/A	-1.67798	9.43e-14	9	1	0	0	1	1	1	1	1	1	0	1	1	1	0	1	0	0	0	1	0	0	0	0	1	0	0
TL	4	51.2879	32350255	G/A	-4.23196	7.49e-27	10	0	1	1	1	1	1	1	1	1	1	1	1	1	1	1	1	1	1	1	1	1	1	1	1	1	1
CD	4	52.0977	33858676	A/C	-0.306897	7.33e-16	5	1	0	0	1	1	1	1	0	0	0	1	0	0	1	0	0	0	1	1	0	1	0	0	1	0	0
CD	4	52.9598	35588440	G/A	-0.461542	1.72e-10	7	1	0	0	0	0	0	0	0	0	0	0	0	0	0	0	0	0	0	0	0	1	0	0	0	0	0
CD	4	53.0987	36055192	C/T	-0.254045	9.95e-18	11	1	0	0	1	1	1	1	0	0	0	1	0	0	1	0	0	1	1	1	1	1	1	1	1	1	1
CD	4	54.6446	45074778	A/C	-0.314778	3.31e-22	8	1	1	0	1	1	1	1	1	1	1	1	0	1	0	0	0	0	1	0	1	1	0	1	1	1	0
CD	4	54.6767	45343075	T/G	-0.261096	7.75e-19	51	0	1	1	1	1	1	0	0	1	1	0	0	1	1	0	0	1	1	1	1	1	0	1	1	1	1
CL	4	55.2871	54382480	C/T	-2.61734	1.83e-11	10	0	0	0	1	1	0	0	0	0	0	0	0	1	0	1	0	0	0	0	0	0	0	0	0	0	0
CD	4	55.3327	56821569	G/A	-0.282905	9.26e-11	7	1	0	0	1	1	1	0	0	1	0	0	0	0	0	0	0	0	0	0	0	1	0	1	0	0	0
ERN	4	56.2086	75262818	T/C	-0.175897	2.75e-15	71	0	1	0	0	1	0	0	0	1	1	0	0	1	0	0	0	1	1	1	1	1	1	0	0	0	0
CL	4	56.3227	76764931	C/T	-1.69735	1.08e-07	11	0	0	0	0	0	0	1	1	1	0	1	0	1	0	1	0	0	0	0	0	0	0	0	0	0	0
CD	4	56.7325	82817607	ATAT/----	-0.282903	4.99e-22	25	1	0	1	1	1	1	1	1	0	1	1	1	1	1	0	0	1	1	1	1	1	0	1	1	1	0
CD	4	56.7431	82975569	G/A	-0.264356	6.1e-12	10	1	0	1	1	1	1	0	1	0	1	0	0	0	0	0	0	0	1	0	0	1	0	1	0	0	0
CL	4	57.5741	92298234	C/T	2.26951	2.02e-07	26	0	0	0	0	0	0	0	0	0	0	0	0	0	0	0	0	0	0	0	1	0	1	0	0	1	0
CD	4	57.7839	98154224	A/C	-0.274329	4.4e-10	7	1	0	0	1	0	1	0	0	0	0	0	0	1	0	0	0	0	0	1	0	1	0	1	0	0	0
CD	4	57.878	103021515	C/T	-0.359477	1.01e-11	7	1	0	0	1	1	0	0	0	0	0	0	0	0	0	0	0	0	0	0	0	1	0	0	0	0	0
CL	4	58.3999	124740205	T/A	-2.84306	2.94e-13	63	0	0	0	1	1	0	0	0	0	0	0	1	0	0	0	0	0	0	0	0	0	0	0	1	0	0
CL	4	58.401	124761005	T/C	-2.61786	1.56e-13	11	0	0	0	1	1	0	0	0	0	0	1	1	0	0	0	0	0	0	0	0	0	0	0	1	0	0
BZ	4	58.4027	124793172	A/G	-1.87066	2.96e-14	12	0	0	1	0	0	1	1	1	1	0	0	1	0	1	1	0	0	1	1	0	1	1	1	0	0	1
BZ	4	58.6106	128848975	----/ATAT	-2.05765	3.51e-15	22	0	0	0	1	1	1	0	0	1	0	0	0	0	1	1	1	0	1	0	0	1	1	1	0	0	1
BZ	4	58.6116	128870583	A/G	-1.69732	1.74e-12	5	0	1	1	1	1	1	0	1	1	0	0	1	1	1	1	1	0	0	0	0	1	1	1	0	0	1
SL	4	58.6989	130660874	T/C	-3.46436	3.91e-19	83	0	0	0	1	1	1	1	1	1	1	1	1	1	1	1	1	1	1	1	1	1	1	1	1	1	1
TL	4	58.6989	130660874	T/C	-3.76779	1.63e-16	79	0	0	0	1	1	1	1	1	1	1	1	1	1	1	1	1	1	1	1	1	1	1	1	1	1	1
BZ	4	58.8967	134241516	T/C	-1.69273	6.64e-15	20	0	1	1	0	1	1	1	1	1	1	0	1	0	1	1	1	1	1	0	0	1	1	1	0	1	0
ERN	4	59.1179	135530069	G/A	-0.263862	8.56e-10	53	0	0	0	1	0	0	0	0	0	0	0	0	0	0	0	0	1	0	1	0	0	0	0	0	0	0
ERN	4	59.3347	136761204	C/G	-0.244811	2.31e-08	5	0	0	0	0	0	0	0	0	0	0	0	0	0	0	0	0	1	0	1	0	0	0	0	1	0	0
SL	4	59.5086	137748404	T/C	-3.32998	1.5e-17	5	1	1	0	1	1	1	0	1	0	1	1	1	1	1	1	1	1	1	1	0	1	1	1	1	1	1
BZ	4	59.7046	138861449	G/T	-1.66014	9.22e-14	8	0	1	0	0	1	1	0	0	1	1	0	1	0	1	1	1	1	0	1	1	1	1	1	0	1	1
BZ	4	60.03	140709354	A/G	-2.26906	3.27e-16	8	0	1	1	0	0	0	0	0	1	0	0	1	0	1	1	1	0	1	0	0	1	1	0	0	1	0
ERN	4	60.1871	141601662	A/C	-0.236361	8.68e-10	11	0	0	0	1	0	0	0	0	0	0	0	0	0	0	0	0	1	0	1	0	1	0	0	0	0	0
ERN	4	60.1909	141622841	A/T	-0.232379	5.37e-14	8	0	1	0	1	0	0	0	0	0	0	0	0	0	0	0	0	1	1	1	0	1	0	0	0	0	0
BN	4	60.2905	142188294	C/G	0.28946	4.55e-19	22	1	0	0	1	0	1	0	1	0	1	1	1	1	0	1	1	1	1	1	1	0	0	1	1	1	1
TL	4	61.5388	146370825	A/T	-3.45215	6.28e-08	11	0	1	0	0	0	1	0	0	0	0	1	1	0	0	1	1	0	0	0	0	0	1	1	1	0	0
SL	4	62.7248	150602866	A/G	-2.53431	2.58e-08	12	1	1	1	1	1	1	1	0	0	1	1	1	1	1	0	1	0	1	1	0	0	1	1	1	0	1
BN	4	62.8933	150838565	C/G	0.338635	2.72e-23	29	1	1	1	1	0	0	1	1	1	1	1	1	1	0	0	1	1	0	1	1	0	0	0	1	1	0
BN	4	63.9525	152319928	C/G	0.321708	1.38e-15	6	1	0	0	1	1	0	1	1	0	1	1	1	0	0	0	1	1	1	1	0	0	0	0	1	1	0
SL	4	63.9778	152355362	T/G	-2.62632	4.74e-08	7	1	0	1	1	1	1	1	1	0	1	1	1	0	0	0	0	1	1	1	0	0	1	0	1	0	0
BN	4	63.9948	152379145	T/C	0.35949	4.92e-17	8	1	0	0	1	1	0	0	1	0	1	1	1	0	0	0	0	1	0	1	0	0	0	0	1	1	0
BN	4	63.995	152379417	G/A	0.320662	3.55e-14	6	1	0	0	1	1	0	1	1	0	1	1	1	0	0	0	1	1	0	1	0	0	0	0	1	1	0
BN	4	63.9993	152385343	-/G	0.342755	7.32e-31	5	1	1	0	1	1	1	1	1	1	1	1	1	1	0	1	1	1	1	1	1	0	0	0	1	1	1
BN	4	63.9993	152385394	T/C	0.296151	1.47e-19	10	1	1	0	1	1	1	1	1	1	1	1	1	1	0	1	1	1	1	1	1	0	0	0	1	1	1
BN	4	64.0009	152387666	GT/--	0.329578	1e-18	11	0	0	0	1	0	1	0	1	0	0	1	1	1	0	1	1	1	0	1	1	0	0	0	1	1	1
SL	4	64.6111	153241047	A/G	-2.89187	2.7e-09	5	1	0	1	1	1	1	1	1	0	1	0	1	1	1	1	1	1	1	1	1	1	1	1	1	1	1
TL	4	64.7994	153504351	G/A	-5.33382	2.59e-07	7	0	0	0	0	0	1	0	0	0	0	0	0	0	0	0	1	0	0	0	0	0	0	0	1	0	0
BN	4	65.6118	154640549	-/T	0.568822	5.56e-09	9	0	0	0	0	0	0	0	0	0	0	1	0	0	0	0	0	0	0	0	1	0	0	0	0	0	0
SL	4	66.4527	155480544	C/T	-2.72746	9.59e-09	17	0	0	1	0	1	0	1	1	0	1	1	1	0	1	0	1	0	1	1	0	0	0	1	1	1	0
TL	4	66.5105	155526236	C/A	-3.04779	8.07e-08	7	0	1	0	0	0	1	0	0	0	1	1	0	0	1	0	1	0	1	1	0	1	1	1	1	0	1
SL	4	67.359	156196884	C/T	-3.16363	3.73e-08	10	0	0	0	0	0	0	0	0	0	0	1	1	1	0	0	0	0	1	1	0	0	1	1	1	1	0
BZ	4	67.8498	156584808	C/A	-2.18434	2.73e-12	5	0	0	0	0	0	1	0	0	0	0	0	1	0	1	0	0	1	0	1	1	1	1	1	0	0	0
TL	4	67.9854	156691985	G/T	-2.77905	1.41e-08	5	1	1	1	0	0	1	1	0	0	1	1	1	0	0	1	1	1	1	1	0	0	1	1	1	0	1
BN	4	71.2877	160256681	G/T	0.383217	4.26e-11	5	0	0	0	0	0	1	0	1	0	0	1	0	0	0	0	0	0	0	0	1	0	0	0	1	1	0
BN	4	74.664	165091693	C/T	0.183756	1.02e-07	47	1	1	1	1	1	1	1	1	1	1	1	1	1	0	1	1	0	1	1	1	1	0	1	1	1	1
BN	4	77.8315	170060797	G/C	0.250221	2.37e-10	7	1	1	1	1	0	1	1	1	1	1	1	0	1	0	0	1	0	1	1	1	1	0	0	0	1	0
CD	4	80.9691	171867255	A/T	-0.21743	4.23e-09	11	0	0	0	1	0	0	0	0	1	0	0	1	1	0	0	1	1	1	0	1	1	0	0	0	0	1
CD	4	84.222	173826417	T/C	-0.248321	1.31e-24	74	1	1	1	1	1	1	1	1	1	0	1	1	1	1	1	1	1	1	1	1	1	1	1	1	1	1
CD	4	84.2731	173857888	C/T	-0.289786	2.25e-08	15	0	0	0	0	1	0	0	1	0	0	0	0	0	0	0	0	1	1	0	0	1	0	0	0	0	0
CD	4	84.4018	173937141	T/C	-0.277469	8.67e-30	9	1	0	1	1	1	1	1	1	0	0	1	1	1	1	0	1	1	1	1	1	1	1	1	1	1	1
BN	4	85.6648	174814369	A/G	0.295931	4.4e-16	12	1	1	0	1	0	1	0	1	1	1	1	0	0	1	0	1	0	1	1	1	1	0	0	1	1	0
BN	4	86.0932	175170082	A/G	0.278967	2.96e-20	31	1	1	1	1	1	1	1	1	1	1	1	1	1	1	0	1	0	1	1	0	1	0	1	1	1	0
BN	4	86.0933	175170118	T/C	0.266753	4.82e-18	8	1	1	0	1	1	1	1	1	1	1	1	1	1	1	0	1	0	1	1	1	1	0	1	1	1	1
CD	4	86.8891	175830846	A/C	-0.195593	1.12e-14	14	1	1	1	1	1	1	1	1	1	1	1	1	1	1	1	1	1	1	1	1	1	1	1	1	1	1
BN	4	89.1948	177684829	T/C	0.282545	5.36e-15	30	1	0	1	1	0	1	1	1	1	1	0	1	1	0	0	1	0	1	1	0	1	0	1	0	1	0
BN	4	89.9442	177829943	A/C	0.260293	3.08e-19	5	1	1	1	1	1	1	1	1	1	1	1	1	1	1	0	1	1	1	1	1	1	0	1	1	1	1
BN	4	91.6879	178856443	C/T	0.297289	1.34e-11	6	1	0	0	0	0	1	0	0	0	0	1	0	0	1	0	0	0	0	1	0	1	0	1	1	1	0
CD	4	95.2261	181732396	A/G	-0.236505	2.45e-08	5	0	0	0	0	0	0	0	1	0	0	0	1	0	0	0	0	1	0	0	1	1	0	0	0	1	1
TL	4	95.7953	182132009	A/C	4.42563	1.62e-07	5	0	0	1	0	0	0	0	0	1	0	0	0	0	0	0	0	0	0	0	1	0	1	0	0	0	0
CD	4	95.8868	182196260	G/A	-0.210807	5.41e-09	5	0	1	0	0	0	0	1	1	0	0	0	1	1	0	0	0	1	1	0	1	1	1	0	0	1	1
TL	4	100.546	186001409	C/T	3.04271	6.43e-08	5	0	0	0	0	0	1	0	0	1	0	1	0	1	0	1	0	1	1	1	1	0	0	0	0	0	0
SL	4	100.558	186113094	G/A	3.9811	3.81e-08	11	0	0	1	0	0	1	0	0	0	0	0	0	0	0	1	0	0	1	0	0	0	0	0	0	0	0
SL	4	101.856	193583263	A/-	3.19613	3.79e-11	5	0	0	1	0	0	1	0	1	1	0	0	1	1	0	1	1	0	0	0	0	0	0	0	0	0	1
SL	4	102.135	193774337	T/G	5.83987	1.31e-15	7	0	0	1	0	0	0	0	0	0	0	0	1	0	0	0	0	0	0	0	1	0	1	0	0	0	0
SL	4	102.505	194028373	C/A	3.40983	4.89e-10	7	0	0	1	0	0	0	0	0	1	0	0	1	0	1	1	1	0	0	0	0	1	0	0	0	0	0
BN	4	102.53	194045201	C/T	-0.433422	6.14e-10	46	0	0	0	1	0	0	0	0	0	0	0	0	0	0	0	0	0	0	0	1	0	1	0	0	0	0
SL	4	102.53	194045490	T/G	7.18156	1.2e-18	41	0	0	0	0	0	0	0	0	0	0	0	0	0	0	0	0	1	0	0	1	0	1	0	0	0	0
BN	4	102.561	194066713	G/A	-0.536707	2e-10	30	0	0	0	0	0	0	0	0	0	0	0	0	0	0	0	0	0	0	0	1	0	1	0	0	0	0
SL	4	102.561	194066713	G/A	8.21489	1.85e-16	24	0	0	0	0	0	0	0	0	0	0	0	0	0	0	0	0	0	0	0	1	0	1	0	0	0	0
TL	4	102.607	194108940	G/C	3.47003	2.33e-10	15	0	0	1	0	0	0	0	1	0	0	1	1	0	0	0	0	0	1	0	1	1	1	0	1	0	0
SL	4	102.956	194823637	C/T	5.35361	2.75e-14	7	0	0	0	0	0	1	0	0	0	0	0	0	0	0	0	0	0	0	0	1	1	1	0	0	0	0
SL	4	103.179	195119994	T/G	2.6173	2.6e-10	5	0	1	1	0	0	1	0	0	1	0	0	1	1	1	1	1	0	0	1	1	1	1	1	0	0	1
BZ	4	103.312	195296556	C/T	3.43496	6.81e-09	12	1	0	0	0	0	0	0	0	0	0	1	0	0	0	0	0	0	0	0	0	0	0	0	1	0	0
BZ	4	103.545	195605265	------/GGCTAA	2.40764	3.51e-08	9	1	0	0	0	0	0	0	0	0	1	1	0	0	0	0	1	1	0	0	0	0	0	0	1	0	0
BZ	4	103.545	195606166	T/C	2.78874	3.04e-12	7	1	0	0	0	0	0	0	0	0	1	1	0	0	0	0	1	1	0	0	0	0	0	0	1	0	0
CD	4	103.912	196093085	----/ATCT	-0.224815	9.86e-12	6	0	1	1	0	0	1	0	0	1	0	0	1	0	0	1	1	1	1	1	1	1	0	0	0	1	0
TL	4	105.444	198109575	G/C	3.80817	2.49e-09	12	0	0	1	0	1	0	0	0	1	0	0	0	1	0	1	0	0	1	0	1	0	0	0	0	0	0
CL	4	106.303	200939508	-------/GTGAGGC	1.48664	5.04e-08	13	0	0	0	0	0	1	0	0	0	0	0	0	1	1	1	1	0	1	0	1	0	0	0	0	1	0
SL	4	106.311	200964896	C/T	-4.35849	3.37e-09	13	1	0	0	1	0	0	0	0	0	0	0	0	0	0	0	0	0	0	0	0	0	0	0	1	1	0
ERN	4	106.55	201752789	G/T	-0.19702	2.12e-12	14	0	0	1	1	0	0	0	1	1	0	1	1	1	0	0	0	0	0	0	1	0	0	1	0	0	0
BZ	4	106.684	202193095	A/G	2.16215	1.17e-15	59	1	1	0	0	1	1	1	1	0	1	1	1	1	0	0	0	1	1	1	1	0	0	0	1	0	0
CD	4	106.841	202544941	T/C	-0.207912	5.34e-12	16	0	1	1	1	1	1	1	1	1	1	1	1	1	0	1	1	1	1	1	1	1	0	0	0	1	0
ERN	4	106.922	202717647	T/C	-0.16187	1.31e-11	7	0	1	1	1	1	1	0	1	1	1	1	1	1	1	0	1	0	1	1	1	1	1	1	0	1	0
ERN	4	107.266	203470380	G/A	-0.210453	1.38e-11	11	0	0	1	1	1	1	0	1	1	0	0	1	1	0	0	1	1	1	0	1	1	0	0	0	1	0
CD	4	107.768	204500687	A/G	-0.192423	1.2e-09	5	1	1	1	1	1	1	1	1	1	0	0	1	1	0	1	1	1	1	1	1	1	1	0	0	1	0
CD	4	107.823	204611633	G/A	-0.177042	3.77e-09	9	1	1	1	1	0	1	1	1	1	0	0	1	1	0	1	1	1	1	1	1	1	1	0	0	1	1
ERN	4	107.942	204905230	A/G	-0.287412	1.19e-39	6	1	1	1	1	1	1	1	1	1	0	1	1	1	1	1	1	1	1	1	1	1	1	1	1	1	1
BN	4	107.943	204906229	G/A	0.499097	1.11e-28	19	1	1	0	1	0	0	1	0	0	0	0	0	0	0	0	0	1	0	0	0	0	0	1	1	1	0
SL	4	107.943	204906229	G/A	-3.31223	1.34e-10	6	1	1	0	1	0	0	1	0	0	0	0	0	0	0	0	0	1	0	0	0	0	0	1	1	1	0
BN	4	107.943	204906694	C/T	0.528589	2.61e-29	81	1	1	0	1	0	0	1	0	0	0	0	0	0	0	0	0	1	0	0	0	0	0	1	0	1	0
ERN	4	107.964	204978175	A/G	-0.287439	7.71e-43	5	1	1	1	1	1	1	1	1	1	0	1	1	1	1	1	1	1	1	1	1	1	1	1	1	1	1
SL	4	108.044	205241289	---/ATT	-3.21878	3.27e-12	31	1	1	0	1	0	0	0	0	0	0	0	0	0	1	0	0	1	0	1	0	0	0	1	1	1	1
BZ	4	108.103	205440703	T/G	2.74252	8.07e-25	12	1	1	1	0	0	0	1	0	0	0	1	0	0	1	1	0	1	1	1	1	0	1	1	1	1	0
SL	4	108.104	205441175	C/T	4.58094	9.73e-12	8	0	0	1	0	0	0	0	0	0	0	1	0	0	0	1	0	0	0	0	1	0	1	0	0	0	0
ERN	4	108.205	205828478	G/A	-0.23244	1.35e-12	10	0	0	0	1	0	1	0	1	1	0	0	0	1	0	0	0	0	0	0	1	1	0	0	0	0	0
ERN	4	108.206	205833115	A/G	-0.330719	5.97e-59	6	1	1	1	1	1	1	1	1	1	0	1	1	1	1	1	1	1	1	0	1	1	1	1	1	1	1
BZ	4	108.207	205834274	A/G	2.72046	4.62e-16	87	1	1	0	0	0	0	0	0	0	0	1	1	0	1	0	1	1	1	0	0	0	0	1	1	1	0
ERN	4	108.207	205834935	T/A	-0.351837	2.08e-56	79	1	1	1	1	1	1	1	1	1	0	1	1	1	0	1	1	1	1	0	1	1	1	0	1	1	1
ERN	4	108.299	206184615	C/A	-0.154733	1.15e-09	8	0	1	0	1	1	1	0	1	1	0	1	1	1	1	0	1	1	0	1	1	1	0	1	0	1	0
TL	4	109.41	210044223	C/T	3.14056	3.8e-10	17	1	1	1	0	0	1	1	0	0	0	1	1	0	1	1	1	1	1	0	1	1	1	0	1	0	0
TL	4	110.522	215953576	A/G	4.03046	3.34e-14	12	1	0	1	0	1	0	1	0	1	0	1	0	1	0	0	1	1	1	0	1	0	1	1	0	0	0
BZ	4	112.199	222232334	A/C	1.82053	5.42e-16	20	1	1	1	0	1	1	1	1	1	1	1	0	1	0	1	1	1	1	1	1	0	1	1	0	1	0
TL	4	112.199	222232334	A/C	3.19532	9.72e-12	6	1	1	1	0	1	1	1	1	1	1	1	0	1	0	1	1	1	1	1	1	0	1	1	0	1	0
TL	4	112.205	222304762	G/A	5.62755	1.36e-21	33	1	1	0	0	0	0	0	0	0	0	1	0	0	0	0	1	1	0	1	1	0	0	1	0	0	0
TL	4	112.327	224195632	T/G	5.96429	2.01e-18	8	0	0	0	0	0	0	0	0	1	0	1	0	0	0	0	1	1	0	0	1	1	0	0	0	0	0
TL	4	112.332	224285017	T/C	5.4455	2.57e-10	6	0	0	0	0	0	0	0	0	1	0	1	0	0	0	0	1	1	0	0	1	1	0	0	0	0	0
TL	4	112.369	224850585	C/T	4.36386	1.71e-21	24	1	0	1	0	0	0	1	0	0	1	1	1	0	0	0	1	1	1	0	1	1	1	1	1	0	0
TL	4	112.381	225032623	T/C	4.04444	5.95e-12	5	0	0	0	0	0	0	0	0	0	0	1	0	0	0	1	1	1	1	0	1	1	1	1	0	1	0
CD	4	113.684	230347113	A/C	-0.240862	4.99e-20	16	0	1	1	1	1	1	1	1	1	1	0	1	1	1	1	1	1	1	1	1	1	1	1	1	1	0
CD	4	113.684	230350001	G/T	-0.182332	2.77e-10	48	0	1	1	1	1	0	1	1	1	1	1	1	1	1	1	1	1	1	1	1	1	1	1	1	1	0
BZ	4	113.969	231182057	G/A	1.86023	3.61e-07	15	1	0	1	0	0	0	0	0	0	0	1	0	0	1	0	1	1	0	0	0	0	1	1	1	0	0
BZ	4	113.974	231197591	G/A	1.96233	7.1e-08	6	1	0	1	0	0	0	0	0	0	0	1	0	0	1	0	1	1	0	0	0	0	1	1	1	0	0
BZ	4	114.224	231927089	T/C	1.50667	1.36e-09	5	1	1	1	0	1	1	1	1	1	0	1	1	1	0	0	1	0	1	0	1	1	0	1	1	0	0
ERN	4	114.344	232278437	C/G	-0.21936	3.05e-13	8	0	0	1	1	0	0	0	1	0	0	0	0	0	1	0	0	0	0	0	1	0	0	1	1	0	0
ERN	4	114.757	233486589	A/G	-0.154935	1.37e-09	6	0	1	1	1	0	1	0	1	1	0	0	0	1	1	0	1	0	0	0	1	1	0	1	1	1	0
ERN	4	115.088	234455821	A/C	-0.297343	1.33e-08	6	0	0	1	0	0	0	0	0	0	0	0	0	0	0	0	0	0	0	0	1	0	0	0	0	0	0
CD	4	116.8	236252994	T/C	-0.175417	1.55e-10	5	1	1	1	1	1	1	1	1	1	1	1	1	1	1	1	1	1	1	1	1	1	0	0	0	1	1
CD	4	117.536	236751817	C/G	-0.168656	6.14e-10	7	1	1	1	1	1	1	1	1	1	1	1	1	1	0	1	1	1	1	0	1	1	1	0	1	1	1
ERN	4	120.756	239721528	T/C	-0.238254	1.93e-11	17	0	0	1	0	0	0	0	1	0	0	0	0	1	1	0	0	0	0	0	1	0	0	0	0	0	0
CD	4	120.849	239747607	T/C	-0.199939	1.73e-15	5	1	1	1	1	1	1	1	1	1	1	1	1	1	1	1	1	1	1	0	1	1	1	1	1	1	1
CD	4	121.77	240005124	A/G	-0.422709	3.28e-11	16	0	0	1	0	0	0	0	0	0	0	0	0	0	0	0	0	0	0	0	1	1	0	0	0	0	0
CD	4	121.782	240008631	T/A	-0.269212	1.16e-07	7	0	0	1	0	0	0	0	0	0	1	0	0	0	1	1	0	0	0	0	0	0	0	0	1	0	0
CD	4	121.782	240008640	C/G	-0.23723	1.39e-08	5	1	1	1	0	0	0	0	0	0	1	0	0	0	1	1	1	0	0	0	0	0	0	0	1	0	0
SL	4	124.901	240928560	G/T	-3.14709	1.59e-11	7	0	1	0	1	1	0	0	1	0	0	0	0	0	1	1	0	1	1	0	0	0	0	0	0	1	1
TL	4	124.901	240928560	G/T	-3.4994	6.49e-10	14	0	1	0	1	1	0	0	1	0	0	0	0	0	1	1	0	1	1	0	0	0	0	0	0	1	1
TL	4	125.081	241000129	C/T	-5.05406	7.38e-09	8	0	0	0	1	0	0	0	0	0	1	0	0	0	0	0	0	1	1	0	0	0	0	0	0	0	0
CD	4	125.081	241000236	-/C	-0.314635	6.19e-13	26	0	0	1	0	1	0	0	0	0	0	1	0	1	0	0	0	0	0	0	1	1	0	0	0	0	0
CD	4	125.084	241001262	T/C	-0.282748	4.05e-12	23	0	0	1	0	1	1	0	0	0	0	1	0	1	0	0	0	0	0	0	1	1	0	0	0	0	0
SL	4	125.914	241331229	C/T	-3.24327	1.24e-10	12	1	0	1	1	1	0	0	1	0	0	0	0	0	1	0	0	1	0	0	0	0	1	0	0	1	0
ERN	4	125.922	241334540	A/T	-0.178768	2.14e-15	9	1	0	1	0	1	0	0	1	0	1	1	1	1	0	0	1	0	1	0	1	1	0	1	1	0	0
ERN	4	125.922	241334649	-/A	-0.231511	1.13e-26	18	0	0	1	1	1	1	1	0	1	0	1	0	1	0	0	1	0	0	0	1	1	0	1	1	1	0
ERN	4	125.922	241334746	A/T	-0.264215	1.11e-11	8	0	0	1	0	0	0	0	0	0	0	1	0	1	0	0	0	0	0	0	1	0	0	0	0	0	0
ERN	4	125.922	241334748	G/C	-0.213707	1.05e-10	9	0	0	1	0	1	0	0	0	0	0	1	0	1	0	0	0	0	0	0	1	1	0	0	0	0	0
ERN	4	125.982	241358406	C/G	-0.222039	5.8e-22	20	0	0	1	1	1	1	1	1	1	0	1	0	1	1	0	0	0	0	1	0	0	0	0	1	1	0
ERN	4	126.848	241703079	G/C	-0.208626	4.09e-30	20	1	1	1	1	1	1	1	1	1	1	1	1	1	1	0	0	0	1	0	1	1	1	0	1	1	1
ERN	4	128.041	242005153	A/G	-0.138495	9.02e-09	5	0	1	1	1	1	0	1	1	0	1	0	1	1	1	0	0	0	0	0	1	1	0	0	0	0	0
ERN	4	128.049	242007163	T/C	-0.189618	5.83e-23	30	0	1	1	1	1	1	1	1	1	1	0	1	1	1	0	1	0	1	0	1	1	0	0	1	1	1
TL	4	130.054	242507672	A/G	-4.50936	5.16e-14	21	0	0	0	1	1	0	0	1	0	1	1	0	0	0	0	0	1	0	1	0	0	0	0	0	0	1
TL	4	130.087	242516241	-------/TACAGGC	-4.39008	8.86e-15	30	0	0	0	1	0	0	1	1	1	1	0	0	0	0	0	0	1	0	1	0	0	0	0	0	1	1
SL	4	131.691	242929739	C/G	-2.6014	1.51e-14	10	0	1	1	1	1	1	1	1	1	1	1	0	1	1	1	0	1	1	1	0	1	1	0	1	1	1
SL	4	132.18	243055785	A/C	-2.70321	1.7e-11	8	1	1	1	1	1	1	1	1	0	1	0	0	0	1	0	0	0	1	1	1	0	0	0	1	1	0
SL	4	132.18	243055819	G/A	-4.23036	5.6e-10	23	1	0	1	1	1	0	0	0	0	0	0	0	0	0	0	0	0	0	0	0	0	0	0	1	0	0
SL	4	133.146	243304759	G/C	-5.19065	1.73e-11	23	0	0	1	1	1	0	0	0	0	0	0	0	0	0	0	0	1	0	0	0	0	0	0	0	0	0
TL	4	133.41	243372829	A/G	-3.67569	6.51e-12	24	1	0	1	1	1	0	1	0	1	0	0	1	0	0	0	0	1	1	0	0	0	1	0	1	0	1
CL	4	139.907	245028188	G/A	-1.94068	2.46e-07	11	0	0	1	1	0	0	0	1	0	0	0	0	1	0	0	0	0	0	0	0	0	0	0	0	0	0
CL	4	140.091	245059370	T/C	-1.12079	3.41e-07	11	0	1	1	1	1	1	0	1	1	0	0	0	1	0	0	0	1	0	0	0	0	1	0	0	1	1
CD	4	141.67	245327468	G/A	-0.16846	2.2e-07	12	0	0	0	0	0	0	0	0	0	1	0	0	0	1	1	0	1	1	1	1	1	0	0	0	1	1
CL	4	143.564	245648929	T/G	-1.59435	4.2e-07	5	0	0	1	0	1	0	1	1	0	0	0	0	0	0	0	0	0	0	0	0	0	0	0	0	1	1
CL	4	151.109	246929927	G/A	-3.13898	8.49e-09	5	0	0	1	0	0	0	0	0	0	0	0	0	1	0	0	0	0	0	0	0	0	0	0	0	0	0
BN	5	-0.120921	406849	G/A	0.280412	3.68e-09	6	0	0	1	1	1	0	0	1	0	0	0	0	1	0	0	0	0	0	1	1	0	0	0	0	0	0
BN	5	0.253006	919086	T/C	0.20793	1.69e-08	5	0	0	1	0	0	1	1	1	1	1	0	1	1	0	0	0	0	0	0	1	1	1	0	0	1	0
BN	5	0.71381	1089206	G/T	0.361648	9.92e-10	9	0	0	1	0	0	0	0	1	0	0	0	0	0	0	0	0	0	0	0	1	1	0	0	0	0	0
BN	5	1.67366	1445854	G/T	0.23675	1.05e-08	8	0	0	1	1	1	1	1	1	1	0	0	0	0	0	0	0	0	0	0	1	1	0	0	0	0	0
BZ	5	1.67566	1446597	A/T	-1.72411	6.43e-10	7	0	1	0	0	0	0	0	0	0	0	1	0	1	0	0	1	1	1	1	0	0	1	0	1	1	1
BN	5	1.79999	1492794	C/T	-0.415255	1.14e-15	6	0	0	0	0	0	0	0	0	0	0	0	0	0	0	0	0	1	1	1	0	0	1	0	1	0	1
BN	5	2.42728	1725870	C/G	0.290576	9.83e-09	6	0	0	1	1	0	1	0	0	0	0	0	0	1	0	0	0	0	0	0	1	1	0	0	0	0	0
BN	5	2.53249	1764964	G/T	-0.615289	1.87e-12	8	0	0	0	0	0	0	0	0	0	0	0	0	0	0	0	0	0	0	0	0	0	0	0	1	0	1
BZ	5	2.68376	1821171	---/AAT	-2.55821	4.78e-10	9	0	0	0	0	0	0	0	0	0	0	1	0	0	1	0	0	0	0	0	0	0	1	0	1	0	1
BN	5	2.68583	1821941	A/G	-0.609291	4.48e-12	5	0	0	0	0	0	0	0	0	0	0	0	0	0	0	0	0	0	0	0	0	0	0	0	1	0	1
BN	5	3.26533	2037261	T/C	-0.462271	1.35e-10	9	0	0	0	0	0	0	0	0	0	0	0	1	0	0	0	0	0	0	0	0	0	1	0	1	0	0
BN	5	3.47537	2115306	T/-	-0.418162	1.46e-11	23	0	1	0	0	0	0	0	0	0	0	0	1	0	0	0	0	0	0	0	0	0	1	0	1	0	0
BN	5	3.49919	2124157	A/G	-0.613329	1.38e-15	6	0	0	0	0	0	0	0	0	0	0	0	1	0	0	0	0	0	0	0	0	0	1	0	1	0	0
BZ	5	4.50923	2278929	C/G	-2.27432	1.31e-10	11	0	0	0	0	0	1	0	0	0	0	1	0	0	1	0	1	0	1	0	0	0	1	0	1	0	0
BN	5	4.84684	2330604	--/GA	0.273756	6.92e-09	28	0	0	1	1	0	0	0	1	0	0	0	0	1	1	0	0	0	0	0	1	1	0	0	0	0	0
BN	5	4.96335	2348437	G/A	-0.544079	5.96e-10	8	0	0	0	0	0	0	0	0	0	0	0	0	0	0	0	0	0	0	0	0	0	1	0	0	0	1
BN	5	5.58897	2444193	A/G	-0.603357	3.63e-12	7	0	0	0	0	0	0	0	0	0	0	0	0	0	0	0	0	0	0	0	0	0	1	0	1	0	0
BZ	5	7.5202	2763566	T/C	-1.60143	5.68e-10	7	1	1	0	0	1	1	0	0	1	1	0	0	0	1	0	1	0	1	0	0	1	1	0	1	0	1
BZ	5	7.75182	2816216	C/T	-2.03386	3.38e-09	18	0	1	0	0	0	0	0	0	1	0	1	0	1	0	0	0	0	0	0	0	0	1	0	1	1	0
BZ	5	7.99886	2872375	C/T	-2.39631	1.73e-10	17	0	0	0	0	0	0	0	0	0	1	1	0	0	0	0	1	0	0	0	0	0	1	0	1	1	0
BN	5	9.74062	3285125	A/G	-0.376015	6.52e-12	22	0	0	0	0	0	0	0	0	0	0	0	1	0	0	0	0	0	1	0	0	0	1	0	1	0	1
CL	5	11.6097	3728157	C/G	-1.60901	3.08e-19	13	0	1	1	1	1	0	0	0	1	0	1	0	1	1	1	1	1	1	1	1	1	0	1	1	1	1
CL	5	11.794	3778637	T/A	-1.68449	1.16e-16	19	0	0	0	1	1	0	0	0	1	1	1	0	1	1	1	1	0	1	1	0	1	1	0	1	1	0
CL	5	12.7059	4028335	A/G	-1.45849	1.29e-17	42	1	1	1	1	1	1	0	1	1	1	1	1	0	0	1	1	0	1	1	1	1	1	0	1	1	1
ERN	5	15.3457	4592341	T/G	0.208232	2.06e-08	27	0	0	0	1	0	1	0	1	0	0	0	0	0	0	0	1	0	0	0	0	0	0	0	0	0	0
CL	5	17.0733	4931273	C/G	-1.60625	3.81e-18	8	1	1	1	1	1	0	0	1	1	1	1	0	1	1	1	1	1	0	1	1	1	0	1	1	1	1
TL	5	19.5814	5423312	C/A	7.25626	7.75e-09	22	0	0	0	0	0	0	0	0	0	0	0	0	1	0	0	0	1	0	0	0	0	0	0	0	0	0
TL	5	20.1654	5537882	G/T	-5.38567	6.7e-12	9	0	0	0	0	0	0	0	0	0	1	1	0	0	0	0	0	0	0	1	0	1	1	0	0	0	0
TL	5	20.2842	5561184	G/C	-5.53612	2.25e-12	69	0	0	0	0	0	0	0	0	0	1	1	0	0	0	0	0	0	0	1	0	1	1	0	0	0	0
CD	5	21.9065	5879450	A/-	-0.209944	2.74e-07	6	0	1	0	0	0	0	0	0	0	0	1	0	0	0	0	0	0	0	0	1	1	1	0	1	0	0
TL	5	23.3794	6267514	C/T	6.88074	1.84e-08	40	0	0	0	0	0	0	0	0	0	0	0	1	0	0	0	0	1	0	0	0	0	0	0	0	0	0
ERN	5	23.3796	6267574	T/C	-0.199763	1.03e-09	5	1	1	0	0	0	0	0	0	0	1	0	0	0	1	0	0	0	0	0	0	0	1	0	0	0	0
TL	5	23.38	6267673	G/A	6.71893	3.86e-08	15	0	0	0	0	0	0	0	0	0	0	0	1	0	0	0	0	1	0	0	0	0	0	0	0	0	0
ERN	5	23.56	6316935	G/C	-0.138989	9.21e-08	5	1	1	0	0	1	0	0	0	1	0	0	1	0	0	0	0	0	0	1	0	1	1	0	0	0	0
ERN	5	23.9535	6424625	T/C	0.19325	5e-09	8	0	0	0	1	1	0	0	0	0	0	0	0	0	0	1	1	0	0	0	0	0	0	0	1	0	0
TL	5	24.3034	6520356	T/C	-3.91147	5.98e-13	22	0	0	0	0	0	1	1	0	1	1	1	0	0	1	1	0	0	1	0	0	1	0	0	0	0	1
ERN	5	24.5786	6595660	C/A	-0.151269	1.07e-10	9	0	1	0	0	0	0	0	0	1	0	1	1	0	0	0	0	1	0	0	1	1	1	1	0	0	1
ERN	5	24.5796	6595947	A/G	0.237366	1.18e-10	23	0	0	0	1	1	0	0	1	0	0	0	0	0	0	0	1	0	0	0	0	0	0	0	0	0	0
CD	5	24.5813	6596407	C/T	-0.17455	9.06e-10	7	1	1	0	0	0	1	1	0	1	0	1	1	0	0	0	0	1	0	0	1	1	1	1	0	0	1
ERN	5	24.5832	6596937	-/A	0.222225	9.26e-10	22	0	0	0	1	1	0	0	1	0	0	0	0	0	0	0	1	0	0	0	0	0	0	0	0	0	0
ERN	5	24.8634	6673601	T/C	-0.209316	1.71e-10	19	0	1	0	0	0	0	0	0	0	1	1	0	0	0	0	0	0	0	0	0	0	1	1	0	0	0
SL	5	28.3848	7482043	A/G	-3.45731	1.56e-24	65	1	1	1	1	1	1	1	1	1	1	1	0	0	0	1	0	0	1	1	0	1	0	1	1	1	1
ERN	5	28.7345	7569374	-------/GAGCGGT	-0.242689	2.89e-09	5	1	0	0	0	0	0	0	0	1	0	0	0	0	0	0	0	0	0	0	0	0	1	0	0	0	0
BZ	5	29.0991	7659558	T/C	1.58252	1.4e-07	5	0	1	0	1	0	0	0	1	0	0	0	1	1	0	0	0	1	1	0	1	1	0	0	0	0	1
SL	5	29.7448	7819318	A/G	-3.65427	1.25e-11	8	1	0	1	0	0	0	0	0	0	1	1	0	0	0	1	0	0	1	1	0	1	0	0	0	0	1
BN	5	30.4315	8652580	T/C	0.378596	3.08e-22	50	0	0	0	1	0	1	1	0	1	1	0	0	0	0	1	0	0	1	0	1	1	0	0	0	0	1
BN	5	30.4315	8652654	T/C	0.411635	7.6e-24	10	0	0	0	1	0	1	1	0	0	1	0	0	0	0	1	0	0	1	0	1	1	0	0	0	0	1
ERN	5	30.7986	9277393	T/C	-0.224375	2.55e-10	35	1	0	0	0	0	0	0	0	0	0	0	1	0	0	0	0	0	0	0	0	0	1	1	0	0	0
SL	5	31.4758	9571119	C/A	2.82652	1.28e-07	10	0	1	0	1	1	0	0	1	1	0	0	1	1	0	0	0	1	0	0	0	0	0	0	0	1	0
BN	5	32.859	10167514	G/A	0.251435	1.64e-07	13	1	0	1	0	0	0	0	0	0	0	1	0	0	0	0	0	1	0	1	1	0	0	0	1	0	0
SL	5	33.0027	10229502	C/A	-3.39396	2.2e-20	18	0	1	1	1	0	1	1	1	1	1	1	0	1	0	1	0	0	1	1	1	1	1	1	0	0	1
SL	5	33.0067	10231195	G/A	-3.57454	1.87e-20	6	0	1	1	0	0	1	1	1	1	1	1	0	1	0	1	0	0	1	1	1	1	1	1	0	0	1
BZ	5	34.0014	10660088	A/C	2.23283	3.6e-17	30	1	1	1	0	1	0	0	1	0	0	0	0	1	0	1	0	0	1	0	1	1	0	1	1	0	1
BN	5	34.1878	10740492	---/CTC	0.324761	3.98e-21	42	0	0	1	1	0	1	1	0	0	1	1	0	0	1	1	0	1	1	0	1	1	0	0	1	1	0
CL	5	36.4863	11731529	A/C	1.8571	2.82e-08	11	0	0	0	0	1	0	0	0	0	0	0	0	0	1	0	0	1	0	0	0	0	0	1	1	0	1
BN	5	36.5895	11753584	--/TA	0.373304	2.37e-07	6	1	0	0	0	0	0	0	0	0	0	0	0	0	0	0	0	1	0	0	0	0	0	0	1	0	0
CD	5	38.5422	12288611	C/T	-0.204884	1.4e-15	6	0	0	1	0	0	0	1	0	1	1	1	1	1	1	0	1	0	1	1	1	1	1	1	1	1	1
BN	5	38.6802	12352806	C/G	0.269682	1.19e-08	13	1	0	0	1	0	0	0	0	0	0	1	0	0	0	0	0	1	0	1	1	0	0	0	1	0	0
CD	5	39.1284	12561283	G/A	0.218563	2.37e-08	6	0	0	1	0	0	1	0	1	0	1	0	0	1	1	1	0	0	1	1	0	0	0	0	0	0	0
BZ	5	39.1945	12592047	G/A	1.83415	3.59e-17	9	1	1	1	0	1	1	0	1	1	1	0	0	1	0	1	0	1	1	1	1	1	1	0	1	1	1
CD	5	40.76	13320224	G/T	-0.394713	2.97e-08	7	1	0	0	0	0	0	0	0	0	0	0	0	0	0	0	0	0	0	0	0	0	0	0	1	0	0
ERN	5	42.8272	14032238	C/-	-0.175	3.09e-12	18	0	1	0	0	0	0	0	0	0	1	1	0	0	1	1	0	0	0	1	0	0	0	1	1	1	0
CD	5	42.9781	14092328	C/T	-0.340681	3.86e-13	49	0	0	0	0	0	0	1	0	1	0	0	1	0	0	0	0	0	0	0	0	0	0	1	0	1	0
CD	5	44.0205	14507326	T/C	-0.251929	3.69e-16	16	1	0	1	0	0	0	1	1	1	1	1	1	1	1	1	0	0	0	0	0	0	0	1	1	1	0
BZ	5	44.6323	14750932	C/A	1.84823	2.13e-14	5	1	0	1	1	1	0	0	1	0	1	0	0	1	1	1	0	0	1	0	1	1	1	0	1	1	1
CD	5	44.7579	14800954	G/A	0.167995	1.33e-07	5	0	1	0	0	1	1	0	1	1	1	0	0	0	1	1	1	1	1	1	0	0	0	0	1	0	0
CL	5	45.6264	15219603	C/A	2.44452	5.46e-08	20	0	0	0	0	0	0	0	0	0	0	0	0	0	1	0	0	1	0	0	0	0	0	1	0	0	0
ERN	5	45.8096	15351496	G/A	-0.20057	2.19e-14	17	0	1	0	0	0	0	0	0	0	1	1	0	0	1	0	0	0	0	1	0	0	1	1	1	1	0
ERN	5	45.8096	15351502	A/C	-0.208248	1.77e-12	11	0	1	0	0	0	0	0	0	0	1	1	0	0	0	0	0	0	0	0	0	0	1	1	1	1	0
BZ	5	46.502	15849967	C/G	1.74385	4.32e-12	51	1	1	1	1	1	0	0	0	0	0	0	0	1	0	1	0	1	1	0	1	1	0	1	1	1	1
CL	5	47.5197	16736500	T/C	2.4029	1.1e-07	6	0	0	0	0	1	0	0	0	0	0	0	0	0	0	0	0	1	0	0	0	0	0	1	0	0	0
ERN	5	49.3239	18573336	C/T	-0.228453	5.78e-15	6	1	0	0	0	0	0	0	0	0	1	1	0	0	0	0	1	0	0	0	0	0	0	1	1	1	0
ERN	5	50.3015	19577541	A/C	-0.171142	5.21e-12	6	1	1	1	0	0	0	0	0	0	1	1	0	0	1	0	0	1	0	0	0	0	0	1	1	1	0
ERN	5	50.3017	19577751	T/C	-0.122397	1.87e-09	7	1	1	1	0	0	0	0	0	0	1	1	1	1	1	1	1	1	0	0	1	1	0	1	1	1	0
ERN	5	50.3018	19577778	--/CA	-0.136319	1.11e-12	9	1	1	1	1	0	0	0	0	0	1	1	1	1	1	1	0	1	0	0	1	1	0	1	1	1	1
BZ	5	51.2615	20865858	G/A	3.63098	8.06e-09	7	0	0	0	0	0	0	0	0	0	0	0	0	0	0	0	0	0	1	0	0	0	0	0	0	1	0
TL	5	54.5094	25854589	A/T	3.86185	3.79e-08	5	0	0	0	1	1	0	0	0	0	0	0	0	0	0	0	1	0	1	0	0	0	1	0	0	1	0
SL	5	55.1791	27626997	G/C	-4.04264	1.65e-08	8	0	0	0	0	0	0	0	0	0	1	1	0	0	1	0	0	0	0	0	0	1	0	0	1	0	0
ERN	5	57.979	34482129	G/T	0.245701	1.14e-08	7	0	0	0	0	0	1	0	0	0	0	0	0	0	0	0	0	1	0	0	0	0	0	1	0	0	0
ERN	5	58.1617	35903602	A/C	0.270357	1.19e-07	5	0	0	0	0	0	1	0	0	0	0	0	0	0	0	0	0	1	0	0	0	0	0	0	0	0	0
BN	5	58.412	38560538	T/A	-0.501265	8.55e-09	5	0	0	0	0	0	0	0	0	0	0	0	1	0	0	0	0	0	0	0	0	0	0	0	0	0	1
BZ	5	59.1371	42087630	T/G	1.81613	2.82e-09	5	1	0	0	1	0	0	0	0	0	0	0	0	0	1	0	0	1	1	0	1	1	0	1	0	1	1
TL	5	59.1373	42088633	C/A	3.35305	3.06e-10	20	1	0	0	1	1	0	0	1	0	0	0	0	0	0	0	1	1	1	0	1	0	0	1	0	1	1
BN	5	59.1569	42183760	CCA/---	-0.382011	8.68e-10	7	0	0	0	0	0	0	0	1	0	0	0	1	0	0	0	0	0	0	0	0	0	0	0	1	0	1
ERN	5	59.3227	42990244	--/AC	-0.328014	3.2e-12	7	0	0	0	0	0	0	0	0	0	0	1	0	0	0	0	0	0	0	0	0	0	0	0	1	1	0
CL	5	60.4672	48557529	GTGGA/-----	2.17726	2.37e-09	9	0	1	0	0	0	0	0	0	0	0	0	0	0	1	0	0	0	1	0	1	0	0	1	0	0	0
CL	5	60.8997	50667584	G/C	-4.21058	1.33e-13	9	0	0	0	0	0	0	1	0	0	0	0	0	0	0	0	0	0	0	0	0	0	0	0	1	0	0
CL	5	61.6297	54233614	A/T	-3.21308	2.36e-12	9	0	0	0	0	0	0	1	0	0	0	1	0	0	0	0	0	0	0	0	0	0	0	0	1	0	0
CD	5	61.726	54704245	T/C	-0.271253	1.43e-13	8	0	1	0	0	1	0	1	1	1	0	1	1	0	1	1	1	0	0	0	0	0	0	1	1	0	0
CD	5	61.7261	54704373	---/TTA	-0.208877	2.82e-08	11	0	1	0	0	1	0	1	1	0	0	1	1	0	0	1	1	0	0	0	1	0	0	1	1	0	0
SL	5	61.8927	55518603	T/C	-3.95861	4.2e-09	12	0	0	0	0	0	0	0	0	0	1	1	0	0	0	1	0	1	0	1	0	0	0	0	1	0	0
SL	5	62.2697	57360080	T/C	-2.75399	3.25e-09	12	1	0	1	0	0	0	0	0	1	1	1	0	1	1	0	0	0	0	1	1	1	0	1	1	0	0
CL	5	62.2837	57428631	G/A	-2.63053	1.09e-13	20	0	0	0	0	0	0	1	0	1	1	1	0	0	0	0	0	0	0	0	0	0	0	0	1	0	0
CL	5	62.2838	57428706	G/A	-2.38863	5.29e-13	6	0	0	0	0	0	0	1	0	1	1	1	0	1	0	0	0	0	0	0	0	0	0	0	1	0	0
CL	5	62.2861	57439964	C/-	-5.77323	1.44e-13	5	0	0	0	0	0	0	1	0	0	0	0	0	0	0	0	0	0	0	0	0	0	0	0	0	0	0
CL	5	62.3134	57565082	G/A	1.80585	1.39e-09	12	0	1	0	0	0	0	0	0	0	0	0	1	0	1	0	0	0	1	1	0	0	0	1	0	1	0
SL	5	62.798	58934655	G/A	-2.78823	1.16e-09	11	0	0	1	0	0	0	1	0	0	0	1	0	1	1	1	1	1	1	1	1	0	0	0	1	0	0
SL	5	62.9844	59271699	T/C	-2.40291	2.32e-10	7	0	1	0	0	0	0	1	1	1	0	1	0	1	1	0	1	1	1	1	1	1	1	1	1	0	0
CD	5	63.2743	60293203	C/G	-0.288206	1.11e-24	15	0	1	1	1	1	1	1	1	1	1	1	1	1	1	1	1	1	0	1	1	1	0	1	1	1	0
CD	5	63.2968	60360299	C/G	-0.26702	2.78e-21	28	1	1	1	1	0	0	1	1	1	1	1	1	1	1	1	1	1	1	0	0	1	0	1	1	1	1
ERN	5	63.4476	60808451	C/T	-0.233525	1.96e-18	43	1	0	0	0	0	0	0	0	1	1	1	1	0	0	0	1	1	0	0	0	0	0	1	1	1	0
ERN	5	63.5175	61041169	C/T	0.310015	9.58e-10	5	0	0	0	0	0	1	0	0	0	0	0	0	0	0	0	0	1	0	0	0	0	0	0	0	0	0
CL	5	63.6185	61498231	T/C	-3.29601	4.24e-13	5	0	0	0	0	0	0	1	0	0	0	1	0	0	0	0	0	0	0	0	0	0	0	0	1	0	0
CD	5	63.9081	62955557	A/G	-0.29057	3.66e-30	37	1	1	1	1	1	1	1	1	1	1	1	1	1	1	1	1	1	1	0	1	1	0	1	1	1	1
TL	5	64.0231	63552662	T/C	-5.8032	8.76e-25	74	0	0	1	0	0	1	1	1	1	1	1	0	0	0	1	0	1	0	0	1	0	0	0	1	0	0
SL	5	64.0726	63839973	G/A	-4.22805	9.49e-16	9	0	0	1	0	0	1	0	0	1	1	1	0	0	0	1	0	1	0	0	1	0	0	0	1	0	0
SL	5	64.3257	65310324	T/G	-4.66462	4.43e-13	52	0	0	1	0	0	1	0	0	0	1	1	0	0	0	0	0	0	0	0	0	1	0	0	1	0	0
TL	5	64.3257	65310325	A/G	-5.72632	4.25e-14	6	0	0	1	0	0	1	0	0	0	1	1	0	0	0	0	0	0	0	0	0	1	0	0	1	0	0
SL	5	64.3259	65311457	C/G	-5.02308	7.95e-15	26	0	0	1	0	0	1	0	0	0	1	1	0	0	0	1	0	0	0	0	0	0	0	0	1	0	0
TL	5	64.3259	65311457	C/G	-7.14288	6.07e-23	5	0	0	1	0	0	1	0	0	0	1	1	0	0	0	1	0	0	0	0	0	0	0	0	1	0	0
CL	5	64.6395	66810753	-----/CTTAC	-3.29283	1.94e-12	9	0	0	0	0	0	0	1	0	0	0	0	0	0	0	1	0	0	0	0	0	0	0	0	1	0	0
CD	5	65.1504	68757843	T/G	-0.178818	4.09e-08	12	1	1	1	1	0	0	1	1	1	1	1	1	1	1	1	1	0	0	1	1	1	1	1	1	1	1
CL	5	65.5008	69395334	T/A	1.69469	6.69e-14	7	0	1	0	1	0	0	0	1	0	0	0	1	1	1	0	1	1	1	0	0	0	1	1	0	1	0
CL	5	65.5011	69396976	C/T	1.86245	9.11e-13	7	0	1	0	0	0	0	0	0	0	0	0	1	1	1	0	1	0	1	0	0	0	1	1	0	1	0
CL	5	65.9427	71654262	A/G	1.69156	6.22e-13	11	1	0	1	0	1	0	0	0	0	0	1	0	0	1	0	1	1	1	0	0	0	1	1	0	1	1
CL	5	65.9546	71811713	G/C	1.93618	2.18e-13	19	1	0	1	0	1	0	0	0	0	0	1	0	0	1	0	0	1	1	0	0	0	1	1	0	0	0
CL	5	66.3138	73516708	T/G	1.94947	2.1e-09	11	0	1	0	0	0	0	0	0	0	0	0	0	1	1	0	0	0	1	1	0	0	0	1	0	0	0
CL	5	66.8846	75530008	T/C	1.59672	4.23e-11	7	1	1	1	0	0	0	0	0	0	0	1	0	0	0	0	1	1	1	0	1	0	1	1	0	0	1
CL	5	67.0306	76039934	G/A	2.13104	9.24e-14	5	1	1	1	0	0	0	0	0	0	0	0	0	1	1	0	0	1	0	0	0	0	0	1	0	1	0
ERN	5	67.1461	76443554	T/C	-0.172433	4.34e-21	46	1	1	1	1	1	0	1	1	1	1	1	1	1	1	0	1	0	1	0	1	0	1	1	1	1	1
TL	5	67.5017	77689864	G/C	4.69206	1.2e-10	5	0	0	0	0	1	0	0	0	0	0	0	0	0	1	0	1	0	1	0	0	0	0	0	0	1	1
TL	5	67.9138	80126977	T/C	4.07706	1.76e-12	28	0	0	0	1	1	0	1	1	1	0	0	0	0	0	1	1	0	1	0	1	0	0	0	0	1	1
BZ	5	68.9333	84887684	A/G	-2.23548	9.08e-08	5	0	1	0	0	0	0	0	1	1	1	0	1	0	0	0	0	0	0	0	0	0	0	0	0	0	0
CD	5	69.2872	87209354	C/T	-0.265062	1.35e-13	5	0	1	1	0	0	0	1	0	1	1	1	0	1	0	1	0	0	0	1	0	0	0	0	1	0	0
TL	5	69.4927	88557383	G/C	-2.99253	7.5e-09	7	0	0	1	1	1	1	0	1	1	1	1	0	1	0	1	0	0	1	1	0	1	0	1	1	0	1
BN	5	69.5363	89056813	G/C	-0.462198	2.02e-12	10	0	1	0	0	0	0	0	0	0	0	0	1	0	0	0	1	0	0	0	0	0	1	0	0	0	0
TL	5	69.7157	91455953	G/T	-4.06301	2.31e-09	5	0	0	0	0	0	1	0	0	1	1	1	0	0	1	0	0	1	0	1	0	0	0	0	1	0	0
TL	5	69.7157	91455961	C/T	-4.63086	1.19e-09	15	0	0	0	0	0	1	0	0	1	1	1	0	0	1	0	0	0	0	1	0	0	0	0	0	0	0
CD	5	70.0149	98426780	A/G	-0.252779	7.43e-15	32	0	1	1	0	0	0	1	1	0	1	1	0	1	1	1	1	0	0	0	0	0	1	1	1	0	0
CD	5	70.1282	102037463	A/G	-0.195223	5.31e-12	22	0	0	1	0	1	1	1	1	1	1	1	1	1	1	1	1	0	0	1	1	0	0	1	1	1	1
BN	5	70.584	116556235	G/A	0.441342	1.85e-08	5	0	0	0	0	0	0	0	0	0	0	1	0	1	0	0	0	0	0	0	0	0	0	1	0	0	0
CD	5	70.6341	118154777	C/A	-0.211633	3.99e-11	7	0	1	1	1	0	1	1	1	0	1	1	0	1	1	1	1	0	1	0	0	0	0	1	1	1	1
ERN	5	70.7895	123103233	T/C	-0.1497	3.29e-10	5	1	0	1	1	1	0	0	1	1	1	1	1	1	1	0	1	0	0	0	0	0	0	0	0	1	0
BN	5	70.8093	123733951	G/A	-0.379746	1.07e-22	34	0	1	0	0	1	0	0	0	1	0	1	1	0	1	0	1	0	1	0	0	0	1	1	0	1	0
ERN	5	70.8901	126309823	G/T	-0.195707	5.29e-13	10	0	0	0	0	0	0	1	1	0	1	1	0	1	1	0	0	0	1	0	0	0	0	0	0	1	0
TL	5	71.0983	132940659	G/T	-4.33867	6.54e-08	6	0	0	0	0	0	1	0	0	0	1	1	0	0	0	0	0	0	0	1	0	0	0	1	0	0	0
BN	5	71.4434	140054887	A/T	-0.319874	1.89e-20	10	0	1	0	1	1	0	1	0	1	0	1	1	0	0	0	1	1	1	0	0	1	1	1	0	1	1
BN	5	71.4859	140258375	C/A	-0.547722	1.59e-16	9	0	0	0	0	0	0	0	0	0	0	0	1	0	0	0	1	0	0	0	0	0	0	0	0	1	1
ERN	5	71.6611	141098554	A/G	-0.269174	9.46e-14	7	0	0	0	0	0	0	0	0	0	0	1	1	0	0	0	1	0	1	0	0	0	0	0	0	1	0
ERN	5	71.6697	141139887	G/A	-0.249318	7.8e-13	12	0	0	0	0	0	0	0	0	0	1	1	1	0	0	0	1	0	1	0	0	0	0	0	0	1	0
BN	5	71.6772	141175818	G/C	-0.468861	7.86e-18	5	0	1	0	0	0	0	0	0	0	0	0	1	0	0	0	1	0	1	0	0	0	1	0	0	1	0
BZ	5	71.6946	141259310	TACG/----	-1.95782	1.94e-08	5	0	1	0	0	0	1	0	1	1	1	0	1	0	0	0	1	0	0	0	0	0	0	0	0	0	0
BN	5	71.9072	142278523	T/A	-0.33631	2.82e-22	9	1	1	0	1	1	0	0	1	1	0	0	1	0	1	0	1	0	1	0	1	0	1	1	0	0	1
BZ	5	72.3433	144369557	C/G	-2.26702	8.39e-08	6	0	1	0	1	1	0	0	1	0	0	0	0	0	0	0	0	0	0	0	0	0	1	0	0	0	0
ERN	5	72.5776	145621663	C/T	-0.345751	6.94e-15	33	0	0	0	0	0	0	0	0	0	0	1	1	0	0	0	0	0	0	0	0	0	0	0	0	1	0
ERN	5	76.9458	164298794	-/C	-0.172182	1.08e-14	17	0	1	1	1	0	0	1	0	0	0	1	1	1	0	0	0	0	1	0	1	0	0	1	0	1	1
ERN	5	76.9459	164298972	C/G	-0.133727	8.42e-10	6	0	0	1	1	0	0	1	0	1	1	1	1	1	1	0	1	1	1	1	1	0	0	1	0	1	1
SL	5	77.4601	165066240	G/C	3.70019	1.9e-10	8	0	1	0	0	1	1	0	0	0	0	0	1	0	0	0	1	0	0	0	0	0	1	0	0	1	0
BN	5	78.8767	166984607	T/C	-0.21946	1.46e-09	25	1	1	0	1	1	0	1	1	1	0	1	1	0	1	0	1	0	1	1	0	1	1	1	0	0	1
BZ	5	79.0555	167178134	A/G	-2.06748	2.18e-10	9	0	0	0	1	1	0	0	1	1	0	0	1	0	0	0	1	0	0	0	0	1	1	0	0	0	0
CL	5	81.7035	169723605	T/C	1.50879	1.43e-09	6	0	1	0	0	1	0	0	0	1	0	0	1	0	1	0	0	0	1	1	0	1	1	0	0	1	0
SL	5	82.4214	170472567	G/A	2.82732	1.99e-11	30	0	1	1	1	1	0	1	1	0	0	0	1	0	0	1	1	1	0	0	0	1	1	0	0	1	0
SL	5	82.4249	170476262	C/T	2.87195	5.68e-11	7	0	1	0	0	1	0	1	1	0	0	0	1	1	0	1	1	1	0	0	0	1	1	0	0	1	0
BZ	5	82.5992	170658131	A/T	2.00541	4.93e-09	6	0	0	1	1	0	0	1	0	0	0	0	1	1	0	1	0	0	1	0	0	0	0	1	0	1	0
SL	5	82.8595	170929671	C/A	4.65498	6.07e-10	10	0	1	0	0	1	0	0	0	0	0	0	0	0	0	0	1	0	0	0	0	0	0	0	0	1	0
BZ	5	83.1309	171212861	G/C	-2.23209	1.87e-16	9	0	1	0	0	0	1	0	1	1	0	0	1	0	1	0	1	1	0	1	1	1	1	0	0	0	0
BZ	5	83.1312	171213118	G/T	2.03303	4.86e-08	6	1	0	1	1	0	0	1	0	0	0	0	0	1	0	1	0	0	0	0	0	0	0	1	0	1	0
BZ	5	83.3648	171583869	A/C	-1.77938	4.09e-15	15	1	1	0	0	1	0	1	1	1	1	1	1	1	1	0	0	1	0	0	1	0	1	1	1	0	0
BZ	5	83.7817	172033771	A/G	-1.94676	3.12e-17	18	1	0	1	1	1	0	1	1	1	1	1	1	0	0	1	1	1	0	1	1	1	1	1	1	0	0
BN	5	84.0996	172681038	T/C	-0.285173	2.23e-13	5	0	1	0	0	1	0	1	0	0	1	0	1	0	1	0	1	1	1	1	0	0	0	0	0	0	1
BN	5	84.851	173355778	T/C	-0.231587	7.12e-14	9	1	1	0	0	1	0	1	1	1	1	1	1	1	1	0	1	1	0	1	0	1	0	1	1	1	1
SL	5	85.7541	174164850	------/CGGGCT	7.59757	6.27e-17	24	0	0	0	0	0	0	1	0	0	0	0	0	0	0	0	1	0	1	0	0	0	0	0	0	0	0
TL	5	85.7541	174164850	------/CGGGCT	7.61483	8.74e-14	8	0	0	0	0	0	0	1	0	0	0	0	0	0	0	0	1	0	1	0	0	0	0	0	0	0	0
SL	5	85.8133	174217912	GGTG/----	9.12535	4.94e-17	51	0	0	0	0	0	0	0	0	0	0	0	0	0	0	0	1	0	1	0	0	0	0	0	0	0	0
TL	5	85.8133	174217912	GGTG/----	8.06329	1.04e-10	11	0	0	0	0	0	0	0	0	0	0	0	0	0	0	0	1	0	1	0	0	0	0	0	0	0	0
BZ	5	86.074	174451438	T/C	-1.99453	2.41e-12	6	1	0	1	1	1	0	1	1	1	0	0	0	0	1	0	1	1	0	1	1	0	1	1	0	0	0
BN	5	86.3395	174689283	T/C	-0.322307	4.75e-17	48	1	0	0	0	1	0	1	1	0	1	1	1	1	0	0	1	1	0	1	0	0	1	1	0	0	0
BN	5	86.4934	174827173	T/G	-0.325758	1.16e-12	5	0	0	0	0	0	0	0	1	1	0	0	1	0	1	0	1	1	0	1	0	1	0	0	0	0	0
SL	5	87.2186	175490844	G/C	5.2741	6.98e-18	17	0	1	0	0	0	0	1	0	1	0	0	0	0	0	0	1	0	1	0	0	0	1	0	0	0	0
BZ	5	89.5508	179145158	C/T	-2.10166	2.43e-12	6	0	0	0	1	1	1	1	1	1	0	0	0	0	0	0	0	0	0	1	1	1	1	0	0	0	0
TL	5	90.6934	180807075	T/C	7.06299	8.54e-13	44	0	0	0	0	1	0	0	0	0	0	0	0	0	0	0	1	0	1	0	0	0	0	0	0	0	0
BZ	5	90.8682	181502097	T/C	-1.71226	3.46e-14	17	1	0	0	1	1	1	1	1	1	1	1	1	0	1	1	1	1	0	1	1	1	1	0	1	0	0
CL	5	91.1389	182361086	A/C	1.27458	6.93e-10	5	0	1	1	1	1	0	1	0	0	0	0	1	1	1	1	1	0	1	1	1	0	1	0	0	1	1
BN	5	94.1846	184807601	C/T	-0.331354	8.53e-10	5	1	0	0	0	0	0	0	1	0	1	0	0	0	0	0	0	1	0	1	0	0	1	0	0	0	0
BN	5	95.1559	185650865	--/CA	-0.268799	1.66e-08	12	1	1	0	0	0	1	1	1	1	1	0	0	0	0	0	0	1	0	1	0	1	0	0	0	0	0
CL	5	95.6258	186058843	-----/TTGTT	1.74765	4.24e-12	17	0	1	1	1	1	0	1	0	0	0	0	1	0	1	0	0	0	1	0	1	1	0	0	0	0	1
TL	5	95.9205	186314678	G/T	7.2506	2.31e-12	24	0	0	0	0	1	0	0	0	0	0	0	0	0	0	0	1	0	1	0	0	0	0	0	0	0	0
BZ	5	97.3297	187538129	C/T	2.09754	4.85e-08	8	0	0	0	0	0	0	0	0	0	0	0	0	1	0	1	0	0	1	0	1	0	0	1	0	1	0
SL	5	102.672	194137417	-----/ATGCA	-3.44364	9e-08	5	0	0	0	0	0	1	0	0	0	1	1	0	0	1	0	0	0	0	0	1	0	0	1	0	0	0
BN	5	103.552	195195812	G/T	0.301896	3.36e-15	6	0	0	1	1	0	0	0	0	1	0	1	0	1	1	1	1	0	1	0	0	1	0	1	1	1	1
TL	5	104.93	196853398	A/T	-4.18078	4.3e-14	6	1	0	0	0	0	1	1	0	0	1	1	0	1	0	0	0	1	0	1	1	1	1	1	1	0	1
CD	5	104.945	196870379	T/C	-0.330309	1.41e-07	14	0	0	0	0	0	0	0	0	0	1	1	0	0	0	0	0	1	0	0	0	0	0	0	0	0	0
BN	5	106.735	199136126	G/A	0.295704	4.28e-16	9	0	1	1	1	1	0	0	0	0	1	1	0	0	0	1	0	0	1	0	1	0	0	1	1	1	1
BN	5	106.905	199442323	T/G	0.329078	4.44e-17	16	0	0	0	1	1	1	0	0	0	1	1	0	0	1	0	0	0	1	0	0	0	0	1	1	1	1
BZ	5	107.077	199664159	A/G	-2.08664	1.66e-09	6	0	0	1	1	0	0	1	1	1	0	0	0	0	0	0	1	1	0	0	1	0	1	0	0	0	0
BN	5	107.196	199743572	T/C	0.319066	7.08e-17	42	0	0	0	0	0	1	0	0	0	1	1	1	1	0	1	0	0	1	0	0	0	1	0	1	1	1
SL	5	107.311	199820288	G/A	-5.1511	3.59e-15	33	0	0	0	0	0	1	0	0	0	0	1	0	0	0	0	0	0	0	0	1	0	0	1	1	0	0
TL	5	107.312	199820785	CTCAGAA/-------	-5.71116	6.93e-16	7	1	0	0	0	0	1	0	0	0	0	1	0	0	0	0	0	0	0	1	1	0	0	0	1	0	0
TL	5	107.662	200054475	G/A	-4.61875	2.05e-30	83	1	1	0	1	1	1	0	1	1	1	1	1	1	0	0	0	1	0	1	1	1	0	1	1	0	1
BN	5	108.144	200375814	T/G	0.24026	5.48e-10	9	1	1	1	0	1	0	0	0	0	1	1	0	0	1	0	1	0	0	0	1	0	0	1	1	0	0
CL	5	108.34	200506476	G/C	-1.21364	7.1e-08	6	0	0	0	1	0	0	0	0	0	1	1	0	1	0	1	1	1	1	0	1	1	1	1	1	1	1
BZ	5	108.691	200740882	G/A	-1.82518	8.42e-13	16	0	0	1	1	1	0	1	1	1	0	0	1	1	0	0	0	1	0	0	1	1	0	1	1	0	0
SL	5	108.803	200817810	G/C	-2.56246	9.29e-08	7	0	1	0	1	0	1	0	0	0	0	1	1	0	0	0	1	0	1	0	1	0	0	1	1	1	1
BZ	5	108.925	201017925	T/A	-2.96066	3.88e-12	26	0	0	0	0	0	0	1	1	0	0	0	1	0	0	0	0	1	0	0	0	0	0	0	0	1	0
SL	5	109.43	201544165	C/T	-3.66177	3.74e-25	11	1	1	0	1	1	1	1	1	0	1	1	1	1	0	0	1	0	0	1	1	0	1	1	1	0	1
TL	5	109.445	201558295	G/A	-2.97866	1.67e-07	10	0	0	0	1	0	1	1	0	0	0	1	1	1	0	0	1	0	0	0	1	0	1	0	1	1	0
CL	5	110.143	202247105	G/A	-2.03173	2.44e-08	6	0	0	0	0	0	1	0	0	0	0	0	0	0	0	1	0	0	0	0	0	1	0	1	0	1	0
SL	5	110.503	202617726	----/TAAG	-3.51043	7.03e-13	14	0	0	0	1	0	1	0	0	1	0	1	0	1	0	0	0	0	1	0	1	0	0	1	1	0	0
BZ	5	110.704	202779409	GTA/---	-2.00736	6.25e-16	54	0	1	1	1	0	1	1	1	0	0	0	1	1	0	0	1	1	0	1	1	1	1	0	0	0	0
CL	5	111.213	202933224	G/A	-1.67931	4.89e-07	6	0	0	0	0	0	0	0	0	0	1	0	0	0	0	1	0	1	0	0	0	0	1	1	1	0	0
CL	5	113.743	203626134	T/G	-1.17124	1.84e-07	8	0	0	0	1	0	1	1	1	1	0	0	0	1	0	1	1	1	1	1	0	0	0	1	1	1	1
CD	5	114.05	203710075	T/G	-0.363721	2.42e-07	18	0	0	0	0	0	0	0	0	0	0	1	0	0	0	0	0	1	0	0	0	0	0	0	0	0	0
SL	5	114.278	203772638	T/C	-3.19502	3.81e-18	35	1	1	1	1	0	1	0	0	1	1	1	1	1	0	0	0	1	0	1	1	0	1	1	1	0	0
CD	5	114.811	204046629	G/T	-0.209113	3.1e-10	18	0	1	0	1	0	1	1	0	0	0	0	0	0	0	0	1	1	1	1	0	0	0	1	0	0	0
CD	5	115.068	204181770	AC/--	-0.225755	2.52e-07	5	0	0	0	0	0	0	0	0	0	0	1	0	0	1	0	0	1	0	0	0	0	1	1	0	0	0
CD	5	115.534	204332302	T/-	-0.22806	1.8e-10	6	0	0	1	1	0	1	1	0	0	1	1	0	0	0	0	0	1	0	1	0	0	0	0	0	0	0
SL	5	116.503	204630972	G/A	-3.07029	1.28e-08	12	0	1	1	0	0	0	0	0	0	0	0	1	1	0	0	1	0	0	1	0	0	1	1	0	0	0
SL	5	117.594	204967336	T/C	-3.50207	3.27e-09	7	1	1	0	1	0	1	0	0	0	1	0	0	0	0	0	0	0	0	1	0	0	1	0	0	0	0
BN	5	117.603	204970166	G/A	0.234263	1.41e-09	6	0	1	1	0	0	1	0	0	1	1	1	0	1	1	1	1	0	1	0	0	0	1	0	1	1	0
BN	5	118.111	205126799	G/T	0.348206	3.96e-09	6	1	0	0	0	0	0	0	0	0	1	0	0	0	1	0	0	0	1	0	0	0	0	0	1	0	0
ERN	5	119.256	205479781	C/G	-0.160433	2.48e-07	7	0	0	1	0	0	0	0	0	1	0	0	0	0	0	0	1	0	0	0	0	0	0	1	0	1	1
BN	5	119.378	205517333	T/C	0.256804	1.1e-09	6	1	0	0	0	0	0	0	0	0	1	1	0	1	1	1	1	0	1	1	0	0	0	1	1	1	0
CD	5	120.027	205717462	G/A	-0.291987	2.91e-10	11	0	0	0	0	0	0	1	0	0	0	1	0	0	0	0	1	0	0	0	0	0	1	1	0	0	0
BN	5	120.452	205848368	T/A	0.243702	4e-14	7	1	1	1	0	1	0	1	1	1	1	1	1	1	1	1	1	0	1	1	1	0	0	0	1	1	0
CL	5	122.471	206470927	G/C	-2.1187	4.44e-35	5	1	0	1	1	1	0	1	1	1	1	1	1	1	0	1	1	0	1	1	1	1	1	1	1	1	1
ERN	5	123.1	206664727	C/T	0.163436	1.59e-07	5	0	0	0	0	1	0	0	1	0	0	0	1	1	0	0	0	0	0	0	0	1	0	0	0	0	0
CD	5	123.64	206904575	G/C	-0.246967	2.43e-09	8	0	0	0	1	0	0	0	0	0	0	1	0	0	0	0	1	0	0	1	0	0	0	1	1	0	0
CD	5	123.853	206999181	-/A	-0.349938	1.89e-09	21	0	0	0	1	0	0	0	0	0	1	0	0	0	0	0	0	0	0	0	0	0	0	1	0	0	0
CL	5	124.053	207088085	T/C	-1.90876	8.36e-25	19	1	1	1	1	1	1	0	1	1	1	1	1	1	1	1	1	0	0	1	1	1	1	1	1	1	0
CL	5	124.063	207092720	G/T	-2.20504	1.3e-32	9	1	0	1	1	1	1	0	1	1	1	1	1	1	1	1	1	0	1	1	1	0	1	1	1	0	0
CD	5	124.066	207093694	G/C	-0.289049	1.48e-10	19	0	1	0	1	0	0	1	0	0	1	0	0	0	0	0	1	0	0	0	0	0	0	0	0	0	0
CD	5	124.066	207093928	--/TC	-0.204669	2.91e-10	5	0	1	0	1	0	0	1	0	0	1	1	1	0	0	0	1	0	0	1	0	0	1	0	1	0	0
CL	5	124.085	207102330	C/T	-1.98877	8.36e-34	5	1	1	1	1	0	1	1	1	1	1	1	1	1	1	1	1	0	1	1	1	1	1	1	1	1	1
CL	5	124.869	207450772	A/T	-1.79555	3.29e-22	12	1	1	1	1	0	0	1	1	1	1	1	1	1	1	1	1	0	1	1	1	1	1	1	1	1	0
CL	5	124.976	207499469	C/T	-1.93461	2.81e-24	29	0	1	1	1	0	1	0	1	1	1	1	0	1	1	1	1	0	1	1	1	0	1	1	1	1	0
BN	5	125.773	207757980	G/A	0.302837	2.35e-09	7	0	0	0	0	0	0	0	0	0	0	0	1	1	1	0	0	0	1	1	0	0	0	0	1	0	0
BZ	5	130.022	209679843	T/A	3.02491	5.79e-08	18	0	0	0	0	0	0	0	0	0	1	0	0	0	0	0	0	0	1	0	0	0	0	0	0	1	0
CD	5	131.417	210065381	C/T	0.234433	2.34e-07	8	0	1	0	0	0	1	0	0	0	0	0	0	1	0	0	0	0	0	0	1	1	0	0	0	0	1
BN	5	137.937	211856382	------/TTGGTC	-0.200135	1.01e-07	6	1	1	1	1	1	0	0	0	0	0	0	0	0	0	0	0	1	0	0	1	1	1	0	0	1	1
ERN	5	138.898	212077084	G/C	0.160183	2.18e-07	12	0	0	0	0	0	1	0	1	1	0	0	0	0	0	0	0	0	0	1	1	0	0	0	0	0	1
ERN	5	139.758	212261703	C/T	0.402422	7.69e-15	45	1	0	0	0	0	0	0	0	0	0	0	0	0	0	0	0	0	0	0	1	0	0	0	0	0	0
ERN	5	140.69	212461617	T/C	0.269155	2.4e-15	32	1	0	0	0	1	0	0	0	1	0	0	0	0	0	0	0	0	0	0	1	0	0	0	0	0	1
ERN	5	142.942	212944985	T/C	0.40057	3.01e-13	19	1	0	0	0	0	0	0	0	0	0	0	0	0	0	0	0	0	0	0	1	0	0	0	0	0	0
BN	5	142.943	212945166	T/G	-0.177893	7.24e-08	7	1	1	1	1	1	1	1	1	0	0	0	1	1	0	0	0	0	0	1	1	1	1	1	0	1	1
TL	6	6.00676	17472860	G/A	5.66281	1.34e-59	53	1	1	1	1	1	1	0	1	1	1	1	1	1	1	1	1	1	1	1	1	1	1	1	1	1	0
SL	6	6.00827	17478541	T/A	2.6532	5.67e-08	8	1	0	0	0	0	1	0	1	0	1	1	0	0	0	0	1	1	1	1	0	0	1	1	1	0	0
TL	6	6.03988	17597597	C/T	4.96782	4.79e-42	5	1	1	0	1	1	1	0	1	1	1	1	1	1	1	0	1	1	1	1	1	1	1	1	1	1	1
CD	6	6.2215	18281785	G/C	0.239503	1.71e-13	19	1	1	1	1	1	0	0	0	1	0	0	1	1	0	1	0	1	0	0	0	1	0	0	0	1	1
CD	6	6.23219	18322049	A/C	0.196863	1.22e-09	6	1	1	1	1	1	0	1	1	1	0	0	1	1	0	1	0	1	1	0	0	1	0	1	0	1	1
BZ	6	6.23302	18325159	---/GTC	1.93126	3.96e-20	16	1	1	1	1	1	1	1	1	1	0	1	1	1	0	0	0	1	1	1	1	1	1	1	1	1	0
BZ	6	6.27044	18466136	G/C	1.95116	9.82e-21	10	1	1	1	1	1	1	1	0	1	1	1	0	1	1	0	0	1	1	1	1	0	1	1	1	1	1
BZ	6	6.27052	18466440	C/T	1.81699	1.63e-17	57	1	0	1	0	1	0	1	0	1	1	1	0	1	1	0	0	1	1	1	1	0	1	1	1	1	1
CD	6	6.29371	18553774	T/C	0.218704	1.42e-11	7	0	1	1	1	1	0	1	1	1	0	0	1	0	0	1	0	1	0	0	1	1	0	0	0	1	0
CD	6	6.34076	18731012	G/A	0.252068	2.08e-16	23	0	1	1	1	1	1	1	1	1	0	0	1	1	0	0	0	0	0	0	1	1	0	0	0	1	0
BZ	6	6.43524	19086952	C/T	2.0595	3.07e-16	5	1	0	0	0	0	0	0	0	1	0	1	0	0	1	0	0	1	1	1	1	1	1	1	1	1	0
TL	6	6.4965	19317706	C/T	5.37516	1.76e-57	7	1	1	1	1	1	1	1	1	1	1	1	1	1	1	1	1	1	1	1	1	1	1	1	1	1	0
TL	6	6.92417	21027029	A/G	5.35498	6.84e-58	5	1	1	1	1	1	1	1	1	1	1	1	1	0	1	1	1	1	1	1	1	1	1	1	1	1	1
TL	6	6.95908	21300518	C/G	5.58755	2.85e-57	7	1	1	0	0	1	1	1	1	1	1	1	1	1	1	1	1	1	1	1	1	1	1	1	1	1	0
TL	6	6.9791	21457343	A/G	5.1565	5.1e-53	17	1	1	1	1	1	1	1	1	0	1	1	1	1	1	1	1	1	1	1	1	1	1	1	1	1	1
CD	6	7.04476	21971635	T/A	0.210766	5.16e-11	7	1	0	1	1	1	0	1	0	1	0	0	1	0	0	0	0	0	0	1	0	1	1	0	1	1	0
CD	6	8.04988	29905377	C/T	0.188301	1.16e-09	5	1	0	0	0	0	0	1	0	1	1	0	0	0	0	1	1	1	0	1	0	1	0	0	0	1	1
CD	6	8.25414	34694577	T/C	0.176087	1.18e-09	6	1	0	0	1	1	0	1	0	1	0	0	0	0	0	1	1	0	1	1	0	1	0	1	1	1	1
BN	6	8.29495	36806882	C/T	0.233694	5.39e-10	20	1	0	0	1	1	0	0	0	1	0	0	0	1	0	0	0	0	1	1	1	1	0	0	1	0	0
ERN	6	8.31692	37944186	A/G	-0.129547	2.86e-07	5	1	0	0	0	0	1	1	0	0	0	1	0	1	0	0	0	0	1	1	1	0	0	1	1	0	0
CD	6	8.36946	40663910	A/G	0.295733	1.76e-10	8	0	0	1	0	1	0	0	0	1	0	0	1	0	0	0	0	0	0	0	0	1	0	0	0	0	1
SL	6	8.41256	42894728	T/C	3.94332	1.02e-36	25	1	1	1	1	1	1	0	1	0	1	1	1	1	1	1	1	1	1	1	1	1	1	1	1	1	1
ERN	6	8.46113	45409021	G/C	0.197148	5.31e-20	91	0	0	0	1	0	0	1	0	1	1	0	0	1	0	1	0	0	1	0	1	1	0	0	1	0	1
CD	6	8.49845	47340768	C/T	0.284074	1.44e-15	8	1	0	1	1	1	0	1	0	1	0	0	0	1	1	0	0	0	0	0	1	1	0	0	0	0	1
CD	6	8.49891	47364746	---/ATC	0.245548	2.84e-17	6	1	1	1	1	1	0	1	1	1	1	0	0	1	0	1	0	0	0	0	1	1	0	0	0	0	1
CD	6	8.49891	47364862	C/T	0.26309	3.13e-19	6	1	0	1	1	1	0	1	1	1	1	0	0	1	0	1	0	0	0	0	1	1	0	0	0	0	1
CD	6	8.61908	53585337	T/A	0.312122	3.32e-11	5	0	0	1	1	1	0	0	0	1	0	0	1	0	0	0	0	0	0	0	0	0	0	0	0	0	1
CD	6	8.73073	57987710	G/T	0.313612	1.87e-11	10	0	0	1	0	1	0	0	0	1	0	0	1	0	0	0	0	0	0	0	0	0	0	0	0	1	0
SL	6	9.44265	64801517	G/A	3.92837	3.57e-31	27	1	1	1	1	1	1	0	1	1	1	1	1	1	1	1	1	1	1	1	1	1	1	0	0	1	1
SL	6	9.54003	65760898	T/C	3.68543	4.3e-22	5	1	1	0	1	1	1	0	1	0	1	1	1	0	1	1	1	1	1	1	1	1	0	0	0	1	1
CD	6	10.3118	73365337	GAA/---	0.2676	5.11e-14	5	0	0	1	1	1	0	1	0	1	0	0	1	1	0	0	0	0	1	0	1	1	0	0	0	0	1
CL	6	10.4657	74881411	-----/ACGCG	-1.6426	1.44e-07	6	0	1	0	0	0	0	1	1	0	0	0	1	0	1	1	0	0	0	0	0	0	0	0	0	0	0
SL	6	10.5885	76090801	--/AG	3.81775	2.26e-29	6	1	1	1	1	0	1	0	1	1	1	1	1	0	1	1	1	1	1	1	1	1	1	1	1	1	0
SL	6	10.5885	76091191	T/A	3.80099	1.94e-31	11	1	1	1	1	1	1	1	1	0	1	1	1	0	1	1	1	1	1	1	1	1	1	1	1	1	1
SL	6	10.8822	77903337	T/C	3.49533	8.91e-22	15	1	1	1	1	1	1	0	1	1	1	1	1	0	1	1	1	1	1	1	0	1	1	1	1	1	1
CD	6	11.1157	78895887	G/A	0.206628	9.69e-11	7	1	0	1	1	1	0	0	0	1	1	0	0	1	0	0	0	0	0	0	0	1	1	1	0	1	1
SL	6	11.4012	80856334	A/G	5.68584	2.86e-08	8	0	0	0	0	0	0	0	0	0	0	1	0	0	0	0	1	0	0	0	0	0	0	0	0	0	0
SL	6	11.7424	81917655	G/A	4.08752	2.89e-09	28	0	0	1	0	0	0	0	0	0	1	1	0	0	0	0	0	0	1	1	0	0	0	0	0	0	0
ERN	6	12.0723	82773923	G/A	-0.139829	2.07e-07	10	0	0	0	0	0	1	1	1	0	0	1	0	0	0	0	0	0	0	1	0	0	0	1	1	0	0
CL	6	15.2628	87782622	T/G	-1.59852	1.04e-07	13	0	1	0	1	0	0	1	1	0	0	0	1	1	0	1	0	0	0	0	0	0	0	0	0	0	0
ERN	6	15.9017	88567740	T/C	-0.115668	6e-08	19	0	1	0	1	0	0	1	1	0	1	1	1	1	1	0	0	0	0	1	0	0	1	1	1	0	0
ERN	6	15.9054	88572254	A/G	-0.132243	3.32e-08	6	0	1	0	1	0	0	1	1	0	1	1	1	1	1	0	0	0	0	0	0	0	0	1	1	0	0
CD	6	16.815	89689995	A/G	0.173882	3.83e-10	5	0	1	1	1	1	1	1	0	1	1	1	1	1	1	0	1	0	0	0	1	1	0	0	1	1	1
BZ	6	16.9618	89870357	C/A	-1.7215	3.2e-07	10	1	0	1	1	0	1	0	0	0	1	0	0	0	1	0	1	0	0	0	0	0	0	0	0	1	1
BZ	6	17.1103	90052804	------/AACTCA	-1.52167	4.7e-07	6	1	0	1	1	0	1	0	0	0	1	0	0	1	1	0	1	0	0	0	0	1	0	0	0	1	1
BN	6	17.7872	90884623	A/-	0.393267	2.55e-10	14	0	0	0	1	1	0	0	0	1	0	0	0	0	0	0	0	0	0	0	0	0	0	0	1	0	0
ERN	6	18.8161	92124510	A/G	-0.0956427	4.13e-07	6	1	1	0	0	0	1	0	1	0	1	1	1	1	1	0	1	1	0	1	0	0	1	1	1	0	0
TL	6	19.0777	92416415	G/A	6.91997	2.15e-08	23	0	0	0	0	0	0	0	0	0	0	1	0	0	0	0	0	0	1	0	0	0	0	0	0	0	0
BN	6	19.3164	92682830	G/A	-0.517958	2.63e-09	6	0	0	0	0	0	0	0	1	0	1	0	0	0	0	0	0	0	0	0	0	0	0	0	0	0	0
CD	6	20.2592	93734809	C/A	0.423711	1.57e-08	5	0	0	0	0	0	0	0	0	1	0	0	0	0	0	0	0	0	0	0	0	0	0	0	0	1	0
CD	6	21.0419	94608240	----/TAAT	0.285873	3.93e-08	5	0	0	1	0	0	0	0	0	1	0	0	0	1	0	0	0	0	0	0	0	0	0	0	0	0	1
BN	6	21.84	95498705	G/A	-0.470779	1.52e-08	22	0	0	0	0	0	0	0	1	0	1	0	0	0	0	0	0	0	0	0	0	0	0	0	0	0	0
BN	6	22.0575	95741426	-------/GACAGAC	-0.473261	1.36e-08	14	0	0	0	0	0	0	0	1	0	1	0	0	0	0	0	0	0	0	0	0	0	0	0	0	0	0
BN	6	22.1437	95840868	GT/--	-0.57576	1.35e-11	13	0	0	0	0	0	0	0	0	0	1	0	0	0	0	1	0	0	0	0	0	0	0	0	0	0	0
BN	6	22.7074	96511043	C/T	0.286658	4.27e-15	7	1	0	0	0	1	1	1	0	1	0	1	0	0	1	0	0	1	1	1	0	1	0	0	1	1	0
CL	6	22.7144	96519317	G/C	-1.39994	1.22e-07	16	0	1	0	0	0	0	0	1	0	0	0	1	1	1	1	0	1	0	0	0	0	1	0	0	1	0
CL	6	22.7144	96519349	T/C	-1.49985	6.24e-08	14	0	1	0	0	0	0	0	1	0	0	0	1	1	1	1	0	1	0	0	0	0	0	0	0	1	0
BN	6	23.5509	97513861	-----/CGTCC	0.320456	1.54e-11	17	1	0	0	0	1	0	0	0	1	0	0	0	0	0	0	0	1	0	1	0	0	1	1	1	0	0
BN	6	23.7129	97706498	G/C	-0.401895	4.44e-11	7	0	0	0	0	0	0	0	1	0	1	0	0	0	1	0	1	0	0	0	0	0	0	0	0	0	0
BN	6	33.1927	107345520	A/-	0.274576	1.09e-14	12	1	0	0	0	1	0	1	0	1	1	1	0	0	1	1	0	1	1	1	0	0	0	1	1	0	0
TL	6	39.0213	112047365	A/G	2.61518	6.19e-08	9	0	1	0	1	1	1	1	1	1	1	1	1	0	0	1	1	1	1	0	1	1	0	0	0	1	0
ERN	6	40.453	113193305	C/A	0.137192	1.61e-07	6	0	0	0	0	1	0	0	0	0	0	0	0	0	0	1	0	0	1	1	0	1	1	1	0	0	1
ERN	6	41.8169	115725215	T/C	0.0784284	9.61e-07	5	1	1	1	1	1	1	1	0	1	1	1	1	1	1	1	0	0	1	1	1	1	1	0	1	1	1
SL	6	42.5617	117587778	T/C	2.19242	1.03e-07	6	0	1	0	1	1	1	0	1	1	1	1	0	0	1	0	1	1	1	0	0	1	1	1	1	0	1
TL	6	43.4051	118230294	C/G	2.96084	3.53e-09	5	0	0	1	1	1	0	1	1	1	0	1	1	0	0	0	0	0	0	0	1	1	0	0	1	1	1
CD	6	46.3379	125222215	-------/ATGAAGA	0.295116	4.47e-09	19	0	1	0	1	0	0	0	0	0	0	0	0	0	0	0	0	0	0	0	0	0	0	0	0	1	1
ERN	6	46.6992	126253745	T/C	0.185094	1.44e-08	5	0	0	0	1	0	0	0	0	0	0	0	0	0	0	0	0	0	1	1	0	1	0	0	0	1	0
SL	6	46.8191	126596078	C/A	3.25521	3.52e-12	9	0	0	0	1	1	1	0	0	1	1	1	1	0	0	0	1	0	0	0	0	1	1	0	1	1	1
SL	6	47.3111	128000510	G/A	3.76499	3.66e-08	6	0	0	0	1	1	0	0	0	0	0	0	1	0	0	0	0	0	0	0	0	1	0	0	0	0	1
ERN	6	47.569	128736838	G/A	0.129279	5.97e-10	13	1	0	0	1	0	1	0	0	0	0	0	0	0	0	1	0	1	1	1	0	1	1	1	0	1	1
CL	6	47.5889	128793671	C/G	-1.65248	9.7e-20	7	1	1	1	1	0	1	1	0	1	1	1	0	1	1	1	1	1	0	1	1	0	1	0	1	1	1
BZ	6	47.7854	129354461	C/A	1.61568	1.17e-09	5	1	0	0	0	0	0	1	1	0	1	1	0	0	1	1	0	1	0	1	1	1	1	0	1	0	0
BZ	6	47.7923	129374288	T/C	1.71528	4.29e-09	5	0	1	0	0	0	0	0	1	1	0	0	1	1	1	0	0	0	0	1	1	1	1	0	0	0	0
CL	6	48.3647	130229466	G/A	-1.62835	2.12e-23	20	1	1	1	1	1	1	1	0	1	1	1	1	1	1	1	1	1	0	1	1	1	1	1	1	1	1
BN	6	48.4205	130269620	C/A	0.410996	3.54e-13	65	0	0	0	0	0	0	0	0	0	0	1	0	0	0	0	0	0	0	1	1	0	0	1	0	1	0
SL	6	48.5379	130354026	G/A	2.75804	1.13e-13	10	1	1	0	1	1	1	0	1	1	1	1	1	0	1	0	1	1	1	1	1	1	1	0	1	1	1
CL	6	48.5888	130390623	A/T	-1.59819	7.27e-19	7	1	0	1	1	1	1	1	1	0	1	0	0	1	1	1	1	1	0	1	1	1	1	1	0	1	1
CL	6	49.1168	130770423	G/A	-7.86618	6.65e-20	6	0	0	0	0	0	0	0	0	0	0	0	0	1	0	0	0	0	0	0	0	0	0	0	0	0	0
SL	6	49.7451	131222367	C/A	3.05538	2.99e-14	28	1	1	0	1	1	1	0	0	1	0	1	0	0	0	1	1	1	1	0	1	0	1	1	1	1	1
CL	6	50.237	131714033	T/A	-8.31826	1.12e-21	13	0	0	0	0	0	0	0	0	0	0	0	0	1	0	0	0	0	0	0	0	0	0	0	0	0	0
CL	6	50.6189	132211119	C/T	-1.758	8.22e-19	15	1	0	1	0	0	1	0	1	0	1	1	1	1	1	1	1	1	0	1	1	0	1	0	1	1	0
SL	6	50.9842	132684550	G/A	5.78656	1.16e-10	28	0	0	0	1	1	0	0	0	1	0	0	0	0	0	0	0	0	0	0	0	0	0	0	0	0	0
TL	6	51.3461	133153202	A/T	4.75434	6.36e-25	53	1	1	0	1	1	0	0	1	1	0	1	1	0	1	0	0	1	0	0	1	1	1	0	1	1	1
CL	6	51.3618	133173520	G/A	-1.61397	4.3e-18	14	1	1	1	1	1	1	1	1	1	0	1	1	1	1	1	0	1	0	0	1	1	1	0	1	1	1
CL	6	52.0369	134047523	T/-	-1.57682	2.68e-22	16	1	1	1	1	1	1	1	1	1	1	1	1	1	1	1	1	1	0	1	1	1	1	1	1	1	1
BN	6	52.2368	134306386	G/A	-0.230527	2.11e-09	6	0	0	0	1	1	1	1	1	1	0	0	1	1	0	0	0	0	1	0	0	0	1	0	0	0	0
SL	6	52.7458	135715265	---/TTT	4.38268	7.72e-09	10	0	0	0	1	1	0	0	0	1	0	0	0	0	1	0	0	0	0	0	0	0	0	0	0	0	0
BZ	6	53.6098	138303188	G/A	1.71383	7.79e-14	28	1	1	1	0	0	1	1	1	1	1	1	0	1	1	0	0	1	0	0	1	1	1	1	1	1	0
CL	6	53.6408	138366931	G/A	-1.62299	4.24e-20	5	1	1	1	1	0	1	1	1	0	1	1	1	1	1	1	0	1	1	0	1	1	1	0	1	1	1
CL	6	54.261	139853629	---/AAA	-8.69516	2.88e-23	9	0	0	0	0	0	0	0	0	0	0	0	0	1	0	0	0	0	0	0	0	0	0	0	0	0	0
SL	6	54.3422	140086315	--/CT	-4.23622	3.46e-10	5	0	0	0	0	0	0	0	0	0	1	1	1	1	0	0	1	0	0	1	0	0	0	0	0	0	0
CL	6	54.4806	140482973	A/-	-8.20404	9.75e-21	26	0	0	0	0	0	0	0	0	0	0	0	0	1	0	0	0	0	0	0	0	0	0	0	0	0	0
CD	6	54.5339	140635593	-/G	0.374241	1.61e-10	11	0	1	0	1	0	0	0	0	0	0	0	0	1	0	0	0	0	0	0	0	0	0	0	0	0	0
SL	6	54.5488	140678355	CT/--	2.50988	3.2e-10	52	1	1	0	1	1	1	0	1	1	1	1	1	0	1	1	1	1	0	1	1	0	1	1	1	1	1
TL	6	54.5488	140678355	CT/--	3.55197	2e-14	44	1	1	0	1	1	1	0	1	1	1	1	1	0	1	1	1	1	0	1	1	0	1	1	1	1	1
CD	6	54.6057	140841403	GTC/---	-0.197351	2.53e-08	7	0	0	0	0	1	0	0	1	0	0	0	0	0	0	0	0	1	1	1	0	1	0	1	0	0	1
CD	6	54.6072	140845511	G/A	0.247626	9.45e-09	6	0	1	0	0	0	0	1	0	0	1	1	0	1	1	0	0	0	0	0	0	0	0	0	0	1	0
CD	6	54.6237	140892757	--/TG	-0.275087	1.37e-09	6	0	0	0	0	0	0	0	0	1	0	0	0	0	0	0	0	1	0	1	0	0	0	1	1	0	0
CL	6	54.6773	141046550	T/C	-7.66117	1.52e-19	9	0	0	0	0	0	0	0	0	0	0	0	0	1	0	0	0	0	0	0	0	0	0	0	0	0	0
CL	6	54.9488	141493898	T/G	-7.58614	5.2e-19	6	0	0	0	0	0	0	0	0	0	0	0	0	1	0	0	0	0	0	0	0	0	0	0	0	0	0
BN	6	55.0195	141602656	TG/--	-0.512038	3.42e-09	8	0	0	0	1	0	1	0	0	0	0	0	0	0	0	0	0	0	0	0	0	0	0	0	0	0	0
BZ	6	55.1386	141785643	C/T	2.09122	1.19e-11	15	1	1	0	0	0	0	1	0	1	0	1	0	0	0	0	0	0	0	0	0	1	1	1	1	1	0
CD	6	56.3974	144158070	A/G	-0.18296	3.02e-12	5	0	0	1	0	1	0	1	1	1	1	1	0	0	1	0	1	1	1	1	1	1	1	0	1	0	0
BN	6	57.1844	145447983	--/TT	-0.336899	8.62e-10	23	0	0	0	1	0	1	0	0	0	0	0	0	1	0	0	0	0	0	0	1	0	0	0	0	0	1
TL	6	57.2235	145494991	--/TC	4.14443	5.45e-12	10	1	0	0	0	0	1	0	0	1	0	1	0	0	1	1	1	0	0	1	0	0	1	0	1	1	0
CD	6	57.3992	145706502	C/G	0.425853	3.04e-13	17	0	1	0	1	0	0	0	0	0	0	0	0	0	0	0	0	0	0	0	0	0	0	0	0	1	0
CL	6	57.4883	145813727	C/T	-7.61423	8.38e-18	7	0	0	0	0	0	0	0	0	0	0	0	0	1	0	0	0	0	0	0	0	0	0	0	0	0	0
CD	6	57.9484	146286868	------/ACTACT	-0.229937	4.84e-10	15	1	0	0	0	0	0	0	0	1	0	0	0	0	0	0	1	0	1	1	0	0	0	1	1	0	0
BZ	6	58.0637	146404950	GCAC/----	2.7322	6.44e-13	28	1	0	0	0	0	0	1	0	0	0	1	0	0	0	0	0	1	0	0	0	0	0	0	1	1	0
CD	6	59.1899	147380163	A/G	-0.209751	6.55e-10	8	0	0	0	0	1	0	0	1	0	0	0	1	0	1	0	1	0	1	1	0	1	0	0	1	0	0
CD	6	59.1963	147385544	-----/AGGAC	-0.172876	3e-10	6	0	0	0	0	1	1	0	1	1	0	0	1	0	1	1	1	0	1	1	0	1	0	0	1	0	1
CD	6	60.0018	148079137	-------/GACGGAA	-0.205081	1.75e-09	8	1	1	0	1	0	1	0	1	1	0	0	0	0	0	0	1	0	1	1	0	1	0	0	0	1	0
SL	6	61.5311	148947186	A/G	2.48538	5.31e-08	8	1	1	1	1	1	1	1	1	1	1	1	1	0	1	1	0	0	1	0	1	0	1	1	1	0	1
CD	6	61.8041	149253633	G/A	-0.205592	2.99e-08	5	0	0	1	0	1	0	0	0	1	0	0	0	0	0	1	0	0	0	1	0	0	0	1	1	0	0
BZ	6	62.7819	149849896	----/GTGA	2.02826	6.87e-09	5	1	0	1	0	0	0	0	1	1	0	0	0	0	0	0	0	0	0	0	1	0	1	0	0	0	1
TL	6	62.8388	149884578	G/C	4.87112	8.32e-21	38	1	0	0	0	0	0	0	0	1	1	1	0	0	1	1	1	0	0	1	0	0	1	1	1	1	1
BZ	6	62.9341	149942656	G/C	1.72075	4.81e-08	10	1	0	1	0	0	0	1	1	0	0	1	0	0	0	1	0	0	1	0	0	0	1	0	0	1	1
BZ	6	63.7886	150463715	A/G	1.8888	1.46e-08	8	1	0	0	0	0	0	1	1	0	0	1	1	0	1	1	0	1	0	0	1	0	0	0	1	1	0
SL	6	63.8632	150509208	A/G	2.85536	3.05e-09	5	1	1	0	1	0	1	1	1	1	1	1	1	0	0	1	0	0	1	1	1	0	1	1	1	1	1
TL	6	64.4074	150841058	T/C	5.32348	5.33e-16	28	1	1	0	0	0	0	0	1	1	1	0	0	0	1	0	0	0	0	0	0	0	1	0	1	1	1
SL	6	64.6113	150965443	A/G	-5.45415	7.95e-15	33	0	0	1	0	0	0	1	0	0	0	0	1	1	0	0	0	0	0	0	1	0	0	1	0	0	0
TL	6	64.6113	150965443	A/G	-4.74144	1.57e-10	7	0	0	1	0	0	0	1	0	0	0	0	1	1	0	0	0	0	0	0	1	0	0	1	0	0	0
TL	6	64.6156	150968022	A/G	-4.69312	2.66e-09	8	0	1	1	0	0	0	0	1	0	0	0	0	1	1	0	0	0	0	0	1	0	0	0	0	0	0
BZ	6	65.8347	151711402	G/A	1.61873	1.37e-09	11	1	0	1	0	1	0	1	1	1	0	1	0	1	1	1	0	0	0	0	0	1	1	1	0	1	1
CD	6	66.2482	151963596	C/G	-0.246822	1.08e-09	5	0	0	0	0	0	0	0	0	1	0	0	0	0	0	0	0	1	1	1	1	1	0	1	0	0	0
BZ	6	66.7855	152291200	G/-	2.94814	2.19e-09	5	0	0	0	0	0	0	1	0	1	0	0	0	0	0	0	0	0	0	0	1	0	0	0	0	1	0
ERN	6	67.8261	152925744	------/CTTCAG	0.211085	3.94e-10	38	0	0	0	1	0	0	0	0	0	1	0	0	0	0	1	0	0	0	1	0	0	0	0	0	1	0
ERN	6	68.0426	153057743	G/T	0.201641	4.4e-09	24	0	0	0	0	0	1	0	0	0	1	0	0	0	0	1	0	0	0	1	0	0	0	0	0	1	0
TL	6	68.6142	153406303	A/G	-3.35071	7.62e-09	7	0	0	1	0	0	0	1	1	0	1	1	1	1	1	1	1	0	0	1	0	0	0	1	0	0	0
SL	6	68.7015	153459565	A/G	3.31369	7.34e-12	27	0	1	0	1	0	1	0	0	1	1	1	0	0	1	1	0	0	1	0	0	0	1	0	1	1	0
CL	6	69.2172	153774029	G/A	-1.86696	6.21e-08	17	0	0	0	1	0	0	1	0	0	0	0	0	1	0	1	1	0	0	0	0	0	0	0	0	1	0
ERN	6	69.4403	153910057	---/CTA	-0.261418	6.43e-17	98	1	0	0	0	0	0	1	0	0	1	0	1	0	0	0	0	1	1	0	0	0	0	0	0	0	0
SL	6	72.0293	155396661	T/A	-3.95971	1.53e-10	22	0	0	1	0	0	0	1	0	0	0	0	0	1	1	0	0	0	1	0	0	0	0	1	0	0	0
TL	6	72.0293	155396661	T/A	-4.32554	7.74e-10	22	0	0	1	0	0	0	1	0	0	0	0	0	1	1	0	0	0	1	0	0	0	0	1	0	0	0
SL	6	72.9095	155785578	T/G	-4.52259	3.25e-13	9	0	0	1	0	1	0	1	0	0	0	0	0	1	0	0	0	0	0	0	1	1	0	0	0	0	0
SL	6	72.9098	155785698	C/G	-4.63941	3.12e-12	5	0	0	1	0	1	0	1	0	0	0	0	0	1	0	0	0	0	0	0	1	0	0	0	0	0	0
BN	6	75.1857	156656695	A/G	-0.220092	8.12e-09	5	0	1	0	1	1	1	0	0	1	0	1	1	0	1	1	0	1	0	0	0	0	0	0	0	0	0
ERN	6	76.7024	157320070	T/C	0.164721	7.91e-10	12	1	0	0	0	0	0	0	0	0	1	0	0	1	0	1	0	0	0	1	1	0	1	0	0	1	0
CL	6	77.0723	157557801	T/G	2.44991	1.44e-07	10	1	0	0	0	0	0	0	0	1	0	1	0	0	0	0	0	0	0	0	0	0	0	0	0	0	0
ERN	6	79.3781	158765860	G/C	0.123557	1.96e-08	6	0	1	0	1	0	0	0	0	0	1	0	0	1	0	1	0	1	1	1	0	1	1	0	1	1	1
BZ	6	86.2619	160828887	G/T	-2.2729	2.3e-08	6	0	1	0	1	0	0	0	0	0	0	0	1	0	0	0	0	1	0	0	0	0	0	1	0	0	0
CD	6	89.0731	162123534	C/T	0.207876	1.19e-07	32	0	0	0	1	0	0	0	0	1	0	0	0	0	1	0	0	0	0	0	0	1	1	0	0	1	1
SL	6	92.1568	162747190	C/T	4.09916	3.19e-08	5	0	1	0	0	0	0	0	0	1	0	0	0	0	0	0	1	0	0	0	0	0	0	0	0	0	1
CL	6	92.2974	162775614	A/C	1.3883	6.93e-08	8	0	0	1	1	0	0	0	0	1	1	1	1	0	1	0	0	1	0	0	1	0	0	0	0	1	0
BN	6	92.4164	162799691	G/A	-0.843123	2.1e-18	5	0	0	0	0	0	0	0	0	0	0	0	0	0	0	1	0	0	0	0	0	0	0	0	0	0	1
BN	6	93.0164	162921033	C/G	0.268499	3.06e-10	7	1	0	0	0	0	0	0	1	0	0	0	0	1	1	1	0	1	0	1	0	1	1	0	0	1	1
BN	6	94.0894	163193443	C/T	0.412975	1.81e-09	7	0	0	0	0	0	0	0	1	0	0	0	0	0	1	0	0	0	0	0	0	1	0	0	0	0	0
BN	6	95.6996	163933167	A/C	-0.504417	1.35e-13	93	1	0	0	0	0	0	0	0	0	0	0	0	0	0	1	0	0	0	0	0	0	0	0	0	0	1
BN	6	95.7902	163952440	A/G	0.29226	1.74e-09	18	0	0	1	0	0	0	0	1	0	1	1	0	0	0	0	0	0	0	0	0	0	1	0	0	1	0
BN	6	95.7909	163952578	A/-	0.268319	4.49e-09	6	1	0	1	0	0	0	0	1	0	1	1	0	0	0	0	0	0	0	0	0	0	1	0	0	1	0
BZ	6	96.9976	164305643	C/T	-1.9753	4.22e-18	35	1	1	1	1	1	0	0	0	0	0	1	0	0	1	1	0	1	1	1	1	0	1	1	1	0	1
BZ	6	97.1955	164379849	C/G	-1.91457	2.89e-17	10	1	1	0	1	1	1	1	0	1	0	1	1	0	1	1	0	1	0	1	0	0	0	1	1	0	1
SL	6	97.2042	164383111	C/T	1.81871	4.69e-07	7	1	1	1	1	0	0	1	0	1	1	1	1	0	1	1	1	1	0	1	0	0	0	1	0	0	1
BZ	6	97.617	164468759	C/A	-2.25975	3.55e-21	20	1	1	0	1	0	1	0	0	0	1	1	1	0	1	1	0	1	1	1	0	1	1	1	0	1	0
BN	6	97.6372	164471920	T/A	0.422396	1.54e-09	19	0	0	0	0	0	0	0	0	0	1	0	0	0	0	0	0	0	0	0	0	1	1	0	0	0	0
BZ	6	98.5271	164611543	A/G	-1.99567	2.83e-18	24	0	1	0	1	1	0	1	0	1	0	1	1	0	1	1	0	1	1	1	1	0	0	1	0	1	1
BN	6	99.6006	164779971	G/A	0.366333	1.84e-09	11	0	0	0	0	0	0	0	1	0	1	0	0	0	1	0	0	0	0	0	0	0	1	0	0	0	0
SL	6	99.6399	164786141	C/T	2.16438	3.39e-07	17	1	1	1	1	0	0	0	1	0	1	1	0	0	0	1	1	0	0	0	1	0	0	1	0	0	1
BZ	6	100.284	164887213	C/T	-2.13751	1.51e-15	9	1	1	0	0	0	0	0	0	0	1	1	0	0	1	1	0	0	1	1	1	0	1	1	0	0	1
BZ	6	100.328	164894038	C/A	2.4416	4.53e-07	6	0	0	1	0	1	0	0	0	0	0	0	0	0	0	0	1	1	0	0	0	0	0	0	0	0	0
BZ	6	105.442	166338845	G/T	2.96778	1.88e-07	9	0	0	0	0	0	0	0	0	0	0	0	0	0	0	0	0	1	1	0	0	1	0	0	0	0	0
BZ	6	107.404	166919468	G/T	2.7399	2.39e-07	8	0	0	0	0	0	0	0	0	0	0	0	0	0	0	0	1	1	0	0	0	0	0	0	1	0	0
CL	6	108.375	167811882	G/A	2.43228	5.13e-08	49	0	1	0	0	0	0	0	0	1	0	0	0	0	0	0	0	1	0	0	0	0	0	0	0	0	0
ERN	6	108.638	168810849	T/C	-0.0896145	1.51e-07	10	1	1	1	1	1	0	1	0	1	1	0	1	1	0	1	0	1	1	0	1	0	1	1	1	1	0
ERN	6	108.655	168874099	T/G	-0.10756	5.26e-07	8	0	1	1	1	0	0	0	1	1	1	0	1	1	0	0	1	0	1	0	0	1	0	0	0	0	0
SL	7	10.3961	3162633	C/T	2.02087	2.09e-08	29	1	1	1	1	1	0	1	1	1	0	0	1	0	0	1	1	0	1	1	1	1	1	1	0	1	0
TL	7	12.8359	3577496	C/G	3.75077	5.57e-08	12	0	0	0	0	1	0	1	0	0	0	0	1	1	0	0	0	0	0	0	0	1	1	0	0	1	0
TL	7	12.8378	3577818	GT/--	2.70168	3.56e-08	42	1	0	1	0	1	0	1	1	1	0	0	1	1	1	0	0	1	0	1	0	1	1	0	0	1	0
SL	7	16.0015	4115777	------/CCAACC	1.92912	1.42e-07	5	1	1	0	1	1	0	1	1	1	1	0	1	1	1	0	1	1	0	1	1	1	1	0	0	1	1
SL	7	16.0689	4127234	A/G	2.32989	7.83e-10	6	0	0	1	1	1	1	1	1	1	0	0	1	1	1	0	1	0	1	0	1	1	1	1	0	1	1
SL	7	20.2275	4834374	A/G	2.25196	1.31e-07	6	1	1	0	0	1	0	1	1	1	0	0	1	0	0	0	0	1	0	0	1	1	1	0	0	1	1
SL	7	27.3524	6200838	C/T	2.90022	1.59e-07	8	0	0	0	0	1	0	0	0	1	0	0	1	1	0	1	0	0	0	0	0	0	1	1	0	1	0
CD	7	28.9354	6746026	G/C	-0.304363	3.8e-07	9	0	0	0	0	0	0	0	0	0	0	0	0	1	0	1	0	0	0	0	0	0	0	0	0	0	1
ERN	7	40.2551	13444198	G/C	-0.145162	8.98e-07	7	0	0	1	0	0	0	1	0	0	0	0	1	1	1	1	0	0	0	0	0	0	0	0	0	1	0
ERN	7	45.164	20983428	G/A	0.170472	1.36e-22	48	1	1	0	1	1	1	0	1	1	1	1	0	0	0	1	1	1	1	1	1	1	1	1	1	1	0
ERN	7	45.5637	21623825	C/G	0.171727	1.78e-20	39	1	1	1	1	1	1	1	0	0	0	1	0	1	0	1	1	1	1	1	1	1	1	1	1	0	0
BN	7	45.6497	21761700	G/A	0.309285	3.62e-08	6	0	1	0	0	0	0	0	0	0	0	0	0	0	0	0	1	1	1	0	1	0	0	0	0	0	0
BN	7	46.7794	27327874	G/C	0.345905	1.34e-13	7	0	0	0	0	0	0	1	0	1	0	0	0	0	0	1	1	0	1	0	1	1	0	1	0	0	1
TL	7	47.4942	31214353	C/T	3.86985	3.01e-08	6	0	0	1	0	0	0	0	0	1	0	1	0	1	0	0	1	1	0	0	0	0	0	0	0	0	0
BN	7	48.1078	34168021	G/T	-0.566955	2.29e-16	5	0	1	0	0	1	0	0	0	0	0	0	1	0	0	0	0	0	0	0	0	0	0	0	0	0	0
BZ	7	48.1665	35583305	C/G	-2.86532	6.91e-08	8	0	0	0	0	1	1	0	0	0	0	0	0	0	0	0	0	0	0	0	0	0	0	0	0	1	0
TL	7	48.2145	36683525	C/T	2.70054	4.48e-09	6	1	0	1	1	1	0	1	1	1	0	1	1	1	1	0	0	1	0	0	1	1	1	1	0	1	0
CL	7	48.2218	36830654	T/-	2.03936	2.89e-12	15	1	0	1	0	0	0	0	0	0	0	0	1	0	0	0	0	1	0	0	1	0	1	1	0	0	0
BN	7	49.1347	52320546	C/T	-0.447067	5.29e-13	5	0	0	1	0	1	0	0	0	0	0	1	1	0	0	0	0	0	0	0	0	0	0	0	0	0	0
CL	7	49.2245	68765517	G/A	1.71254	3.7e-10	6	1	0	1	0	0	0	0	0	0	0	0	1	0	1	1	1	0	0	0	1	0	0	1	0	1	0
CL	7	49.3394	72122677	C/G	1.40161	5.53e-11	13	1	1	1	0	0	0	0	1	0	0	1	1	0	0	1	1	1	1	0	1	0	1	1	0	0	0
BZ	7	49.8434	82812713	T/G	1.61033	6.31e-08	6	1	1	1	1	0	1	1	0	0	0	0	0	1	0	0	1	1	1	1	1	1	0	0	1	0	1
BZ	7	49.9783	85903408	T/A	1.58068	4.98e-08	8	1	0	1	1	0	0	1	0	0	0	0	0	1	1	0	1	1	0	1	0	0	1	1	1	0	1
BN	7	50.0032	86510262	C/T	0.372771	1.01e-16	12	0	0	0	0	0	0	1	0	1	0	0	0	1	0	0	1	0	1	1	1	1	0	0	0	1	1
BZ	7	50.0301	87408800	A/G	-2.55608	1.81e-08	20	0	1	0	0	1	1	0	0	0	0	0	0	0	0	0	0	0	0	0	0	1	0	0	0	0	0
SL	7	50.0753	88924387	C/T	4.71076	2.21e-21	17	1	0	1	0	1	0	0	0	1	0	0	1	1	0	0	0	1	0	0	0	0	0	1	0	1	0
BZ	7	50.0756	88934527	G/A	-2.73885	2.6e-07	8	0	0	0	0	1	1	0	0	0	0	0	1	0	0	0	0	0	0	0	0	0	0	0	0	0	0
SL	7	50.1308	90784593	A/G	4.31429	6.1e-13	6	1	0	0	0	1	0	0	0	1	0	0	1	0	0	0	0	1	0	0	0	0	0	1	0	0	0
SL	7	50.1564	91642056	G/A	4.97807	8.66e-22	10	1	0	1	0	1	0	0	0	1	0	0	1	1	0	0	0	1	0	0	0	0	1	1	0	1	0
SL	7	50.1812	92470768	C/A	4.27469	1.16e-18	18	1	0	0	0	1	0	0	0	1	0	0	1	1	0	0	0	1	0	0	0	1	1	1	0	1	0
BN	7	50.2834	93930595	A/C	-0.538371	7.19e-21	7	0	1	0	0	1	0	0	0	0	0	1	1	0	0	0	0	0	0	0	0	0	0	1	0	0	0
SL	7	50.2834	93930595	A/C	5.21511	2.81e-16	33	0	1	0	0	1	0	0	0	0	0	1	1	0	0	0	0	0	0	0	0	0	0	1	0	0	0
BN	7	50.5222	96304227	G/C	-0.779319	8.77e-19	6	0	0	0	0	1	0	0	0	0	0	0	0	0	0	1	0	0	0	0	0	0	0	0	0	0	0
TL	7	50.5876	96953670	A/G	3.95094	2.39e-12	6	1	0	0	0	0	0	1	1	1	0	0	1	1	0	0	1	0	1	0	1	0	0	1	0	1	0
BN	7	50.6997	98067973	-/T	-0.538502	5.34e-20	13	0	1	0	1	1	1	0	0	0	0	0	0	0	0	0	0	0	0	0	0	0	0	1	0	0	0
BN	7	51.1912	101264449	T/C	-0.654745	1.37e-14	15	0	1	0	0	1	0	0	0	0	0	0	0	0	0	0	0	0	0	0	0	0	0	0	0	0	0
ERN	7	51.4426	101799244	T/C	-0.245009	4.6e-09	5	0	0	0	0	0	0	0	1	0	0	0	0	0	0	0	0	0	0	0	0	0	0	0	0	1	1
SL	7	51.4433	101800676	T/C	3.99028	2.25e-15	8	1	1	0	1	1	0	0	0	0	0	0	1	1	0	0	0	0	1	0	0	0	0	1	0	1	0
SL	7	51.9742	102845682	G/C	-7.93593	1.67e-14	5	0	0	0	0	0	0	0	0	0	0	0	0	0	0	0	0	0	1	0	0	0	0	0	0	0	1
BZ	7	51.9745	102846289	A/G	1.62777	8.67e-10	5	1	0	1	1	0	0	1	1	0	0	1	0	1	1	1	1	1	1	1	1	0	0	1	1	1	1
BN	7	52.0263	102948238	T/C	0.417404	1.23e-14	10	0	0	0	1	0	0	0	1	0	0	0	0	0	0	0	1	0	0	0	1	0	1	0	0	0	1
CL	7	52.0764	103046989	T/C	1.56731	1.01e-11	5	1	1	0	0	1	1	0	0	0	0	1	1	0	0	0	1	1	0	0	1	0	1	1	0	1	0
BN	7	52.2508	103390133	G/C	0.256377	2.26e-11	5	0	1	1	1	0	1	1	1	1	0	1	1	1	1	0	1	0	1	0	0	0	1	0	0	0	1
BN	7	52.3629	103610849	T/G	0.484624	3.72e-17	24	0	0	1	0	0	0	1	0	1	0	0	0	0	0	0	0	0	0	0	1	0	0	0	0	0	1
BN	7	52.4805	103842455	C/G	0.387572	1.35e-19	5	1	1	1	1	1	1	1	1	0	1	0	0	1	1	0	1	0	1	1	1	1	1	1	1	0	1
TL	7	53.9068	106650211	C/T	5.53724	8.95e-17	85	1	0	0	0	0	0	1	0	0	0	0	1	1	0	0	0	0	0	1	1	0	0	1	0	1	0
SL	7	54.859	108524673	G/A	-8.69339	2.6e-15	12	0	0	0	0	0	0	0	0	0	1	0	0	0	0	0	0	0	0	0	0	0	0	0	0	0	1
ERN	7	55.6817	110144032	G/C	0.214413	1e-07	5	1	1	1	1	1	0	0	1	1	0	1	1	1	1	1	0	1	1	0	1	1	1	1	1	1	0
CL	7	55.755	110288364	-----/CAGAC	1.8017	1.5e-11	9	0	0	1	0	1	0	0	1	0	0	1	1	1	0	0	1	0	0	0	1	0	1	1	0	0	0
BN	7	56.5623	111877596	A/T	0.307326	7.35e-09	5	0	0	1	0	0	1	0	0	1	0	0	0	0	0	0	1	1	0	0	1	0	1	0	0	0	1
BN	7	56.5819	111916237	C/G	0.523876	1.24e-13	7	0	0	1	0	0	0	0	0	1	0	0	0	0	0	0	0	0	0	0	1	0	0	0	0	0	1
SL	7	56.7198	112187719	C/T	-5.94536	5.95e-19	22	1	0	1	0	0	0	0	0	0	1	0	0	0	0	0	0	1	1	0	0	0	1	0	0	0	1
TL	7	56.7644	112275375	-----/GCTTC	4.80101	2.4e-12	8	0	0	0	0	1	0	0	0	1	0	1	1	1	0	0	1	1	0	0	1	0	0	1	0	0	0
ERN	7	56.9932	112725793	G/A	0.224893	8.15e-13	7	0	1	0	1	0	1	0	0	0	0	0	1	1	0	0	0	0	1	0	0	0	0	0	1	0	0
TL	7	57.1956	113124300	A/C	3.59102	2.31e-10	5	1	0	1	0	1	0	0	1	1	0	1	1	1	0	0	1	1	1	0	0	0	0	0	0	1	0
SL	7	57.196	113124982	C/G	-9.87727	1.15e-19	39	0	0	0	0	0	0	0	0	0	0	0	0	0	0	0	0	0	1	0	0	0	0	0	0	0	1
BN	7	57.6016	113923460	G/T	0.498297	5.99e-31	21	0	0	1	1	0	1	0	1	1	0	0	1	1	0	0	1	1	1	0	1	1	0	1	0	1	1
BZ	7	57.6016	113923460	G/T	3.91585	4.61e-41	77	0	0	1	1	0	1	0	1	1	0	0	1	1	0	0	1	1	1	0	1	1	0	1	0	1	1
BZ	7	57.6016	113923463	T/C	3.91703	5.95e-42	23	0	0	1	1	0	1	0	1	1	0	0	1	1	0	0	1	1	1	0	1	1	0	1	0	1	1
BN	7	57.81	114333677	A/G	-0.464572	1.36e-22	23	0	1	0	1	1	0	0	1	0	1	1	0	0	1	1	0	0	0	1	0	0	1	0	0	0	0
CD	7	58.3116	115321134	C/T	0.224123	2.25e-16	5	0	1	1	1	1	1	1	0	1	1	0	0	1	0	0	0	1	1	0	1	1	1	1	1	0	0
ERN	7	58.4674	115627816	A/C	0.167895	2.9e-11	21	1	1	0	1	1	0	0	1	0	0	1	1	0	0	0	0	0	0	0	1	1	1	1	1	0	0
CL	7	58.5343	115759630	C/-	2.43559	5.57e-11	15	0	0	0	0	0	0	0	0	0	0	0	1	0	1	0	0	0	0	0	1	0	1	1	0	0	0
BN	7	58.7203	116125784	G/C	0.497842	2.38e-35	28	1	0	1	0	0	0	0	1	1	1	0	0	1	1	1	1	1	1	1	1	1	0	0	1	0	1
CD	7	58.8707	116421725	G/C	0.262927	2.39e-23	7	1	1	1	1	0	1	1	1	1	1	1	1	1	1	0	1	1	1	0	1	1	1	0	1	0	0
ERN	7	58.9873	116651331	G/A	0.184047	1.22e-13	11	1	1	0	1	1	0	1	1	0	0	0	0	1	0	0	0	1	1	0	1	1	1	0	1	0	0
BN	7	59.1719	117014727	C/T	0.472155	6.63e-28	47	1	0	1	0	0	0	0	1	0	0	0	1	1	1	0	1	0	1	0	0	1	0	0	1	0	1
BZ	7	59.1792	117029067	C/T	2.81221	4.48e-10	7	0	0	0	0	0	0	1	0	0	0	0	0	1	1	0	0	0	1	0	0	0	0	0	0	0	1
BZ	7	59.2666	117201161	G/A	2.5465	1.72e-10	8	1	0	0	0	0	0	1	0	0	1	0	0	0	1	0	0	0	1	0	0	0	0	0	0	0	1
BZ	7	59.2667	117201318	C/T	2.89332	4.36e-11	32	0	0	0	0	0	0	1	0	0	1	0	0	0	1	0	0	0	1	0	0	0	0	0	0	0	1
ERN	7	59.3072	117280953	C/G	0.249988	4.15e-10	16	1	0	0	0	0	0	0	0	0	0	0	1	0	0	0	0	1	0	0	0	0	0	0	1	0	0
CD	7	59.7007	118055618	T/A	0.277575	1.04e-14	63	0	0	0	0	0	1	1	0	1	1	1	0	0	0	0	0	1	1	0	1	0	1	0	0	0	0
CD	7	59.9044	118456695	C/T	0.168016	7.22e-08	9	1	1	0	1	0	1	0	1	1	0	1	1	1	1	0	0	0	0	0	0	1	0	0	1	0	0
TL	7	60.6504	119925163	A/G	6.19327	9.65e-15	9	0	0	0	0	0	0	0	0	0	0	0	1	1	0	0	0	0	0	0	1	0	0	1	0	1	0
CD	7	60.8015	120222645	A/C	0.192869	5.38e-13	9	1	1	0	0	0	1	1	1	1	1	1	0	0	1	0	0	1	1	0	1	0	1	1	1	1	0
CD	7	60.8016	120222794	A/G	0.254097	3.3e-16	6	0	0	0	0	0	1	1	0	1	1	1	0	1	1	0	0	1	1	0	0	0	0	1	1	0	0
BZ	7	61.0407	120693595	G/A	3.86892	4.97e-11	23	0	0	1	0	0	0	0	0	0	0	0	0	0	0	0	0	0	1	0	0	0	0	0	0	0	1
ERN	7	63.203	122633428	C/A	0.161664	3.95e-10	7	1	1	0	1	0	0	0	0	0	0	0	0	1	0	0	0	0	1	0	0	1	0	1	1	1	0
CD	7	63.2032	122633844	G/A	0.169719	2.65e-08	5	1	1	0	1	0	1	0	0	0	0	0	0	1	1	0	0	0	1	0	0	1	0	1	1	1	0
ERN	7	63.2187	122672355	G/A	0.164323	8.16e-11	6	1	1	0	1	0	0	0	0	0	0	0	0	1	0	0	0	0	1	0	0	1	0	1	1	1	0
ERN	7	63.6457	123515105	-------/GCACCGT	-0.217949	1.23e-07	10	0	0	0	0	0	0	1	0	0	0	1	0	0	0	0	0	0	0	0	0	0	0	0	0	0	1
ERN	7	63.6467	123516755	C/A	-0.338538	2.3e-11	13	0	0	0	0	0	0	1	0	0	0	0	0	0	0	0	0	0	0	0	0	0	0	0	0	0	1
ERN	7	64.7558	124479270	T/C	-0.134139	2.81e-07	6	0	0	0	0	0	0	1	0	1	0	1	0	0	1	1	0	0	0	1	1	0	1	0	0	0	1
TL	7	68.4671	127340642	C/A	5.07048	3.21e-09	8	0	0	0	0	0	0	0	1	1	0	0	1	0	0	0	0	0	0	0	0	0	0	0	0	1	0
CD	7	69.7709	128342691	CGA/---	0.236539	2.64e-07	5	0	0	0	0	0	1	0	0	0	1	1	0	1	0	0	0	0	0	0	0	0	1	0	0	0	0
TL	7	75.4539	137280566	T/C	-3.40719	1.19e-07	6	0	1	0	1	1	0	0	0	0	1	1	0	0	0	0	0	1	0	0	0	0	0	0	1	0	0
SL	7	76.4772	137819147	A/G	3.93216	1.24e-10	31	1	0	0	0	0	0	0	0	0	0	0	1	1	0	0	1	0	0	0	1	0	0	0	0	1	0
TL	7	77.2546	138821114	G/A	-4.01638	6.46e-12	6	1	0	1	1	1	0	0	0	0	1	1	0	0	0	0	0	0	0	1	0	0	0	1	1	0	0
SL	7	77.6989	139291199	-------/CTAATGT	-3.41707	1.25e-15	9	1	1	1	1	0	1	0	0	0	1	1	0	0	0	1	0	0	0	1	1	0	1	0	1	0	1
SL	7	77.6995	139291877	G/T	-3.91111	5.61e-22	5	1	1	1	1	0	1	1	0	0	1	1	0	0	0	1	0	0	0	1	1	0	1	0	1	0	1
ERN	7	77.8969	139500655	A/C	0.297422	1.81e-12	88	0	0	0	0	0	0	0	1	0	0	0	0	1	0	0	0	1	0	0	0	0	0	0	0	0	0
SL	7	78.0273	139638678	------/CAGTAA	-2.55922	6.13e-10	11	1	1	1	0	1	1	0	1	1	1	0	0	0	1	1	0	1	1	1	0	0	1	0	1	0	1
SL	7	78.207	139828781	G/A	-3.35663	2.28e-14	6	1	1	1	1	0	0	1	1	1	1	0	0	1	1	1	0	1	0	1	0	1	1	0	1	0	0
SL	7	79.8298	141545821	-----/ACGGG	3.05092	7.54e-10	7	0	0	0	0	1	1	1	1	0	1	0	1	1	1	0	1	0	0	0	1	0	0	0	0	1	1
SL	7	80.1974	141934663	------/TGCGCA	-4.07163	1.3e-11	6	0	0	1	1	0	0	0	0	0	1	1	0	0	0	1	0	1	0	0	0	0	0	0	1	0	1
SL	7	81.1027	142900510	G/A	-4.13813	4.62e-11	6	0	0	1	1	0	0	0	0	1	0	1	0	0	0	1	0	0	0	0	0	0	0	0	1	0	0
SL	7	83.3804	145472569	T/C	-3.73272	7.91e-21	17	0	1	1	1	1	1	1	1	1	1	1	0	1	1	1	0	1	1	0	0	1	0	0	1	0	1
SL	7	84.3461	146441197	-/C	-4.26898	6.54e-15	13	1	0	1	0	0	1	0	0	1	0	1	0	0	0	1	0	1	0	1	0	0	0	0	0	0	1
TL	7	84.71	146806148	C/G	-5.20042	3.64e-33	29	1	1	1	0	1	1	1	0	1	1	1	0	1	1	1	0	1	1	1	1	1	1	1	1	0	0
SL	7	84.7122	146808356	C/G	-3.16094	5.01e-11	6	0	1	1	1	1	1	1	0	1	1	1	0	1	1	1	0	1	0	0	1	1	1	0	1	0	0
TL	7	85.0297	147126808	AGAGAGA/-------	-4.70132	4.28e-22	15	1	1	1	0	0	1	1	0	1	1	1	0	1	1	1	0	1	0	1	0	0	1	0	0	0	1
TL	7	85.03	147127126	G/C	-5.35206	1.1e-29	14	1	1	1	0	0	1	1	1	1	0	1	0	1	1	1	0	1	0	1	0	0	1	0	1	0	1
TL	7	85.0308	147127968	G/C	-5.1077	4.07e-26	25	1	1	1	0	0	1	1	1	1	0	0	0	1	1	1	0	1	0	1	0	0	1	0	1	0	1
TL	7	85.0334	147130507	A/G	-5.99748	5.82e-27	8	1	1	1	0	0	1	0	0	1	0	0	0	1	1	1	0	1	0	1	0	0	1	0	0	0	1
TL	7	86.4328	148534158	----/TAAA	4.84203	5.46e-08	8	0	0	0	0	0	0	1	0	0	0	0	0	0	1	0	0	0	1	0	1	0	0	0	0	1	0
BZ	7	86.4384	148539723	TCA/---	-1.92418	7.44e-11	65	1	0	1	1	1	0	0	1	0	0	1	0	1	0	0	0	1	0	1	0	1	0	1	1	0	0
CL	7	88.4415	150548840	----/CTTC	-2.39304	3.73e-16	8	0	1	0	0	0	0	0	0	0	1	0	0	0	1	1	0	0	0	0	1	1	1	0	0	1	0
CL	7	89.6969	151668126	C/T	-1.51288	6.71e-15	7	1	1	1	0	1	0	1	0	1	1	1	0	0	1	1	0	1	1	1	1	0	0	1	0	1	1
CL	7	89.8329	151740413	T/G	-1.84707	3.95e-16	6	1	1	0	0	1	0	0	0	0	1	0	0	0	1	1	0	1	1	1	1	1	0	0	0	0	1
CL	7	89.8338	151740915	-/A	-1.7738	3.97e-16	51	1	1	0	0	1	0	0	0	0	1	0	1	0	1	1	0	1	1	1	1	1	1	0	0	0	1
CL	7	89.8339	151740952	C/G	-1.67982	2.93e-16	10	1	1	0	0	1	0	0	0	0	1	1	0	0	1	1	0	1	1	1	1	1	0	0	1	1	1
CL	7	89.9312	151792669	C/T	-1.68749	7.61e-17	7	0	1	1	1	0	0	1	1	1	1	1	0	0	1	1	0	0	1	1	1	1	1	0	0	0	1
CL	7	90.2577	151966261	-------/ACCGAGC	-1.6219	9.47e-17	5	1	0	1	0	0	0	1	0	1	1	1	0	0	1	1	0	1	1	1	1	1	1	0	1	1	1
CD	7	91.1877	152460688	---/TGC	-0.190678	2.39e-12	6	0	1	1	0	0	0	0	0	1	1	1	1	1	1	0	1	1	0	0	1	1	1	1	1	0	1
CD	7	94.5491	154247806	A/G	-0.22291	1.42e-12	7	0	1	1	0	1	1	0	0	0	1	0	1	0	0	1	1	0	0	0	1	0	0	1	1	0	1
CD	7	96.1915	155072100	T/C	-0.211177	2.46e-15	13	0	1	1	1	0	1	0	0	1	0	1	1	1	1	1	1	1	1	0	1	0	1	1	1	0	1
CD	7	97.0321	155477559	C/T	-0.222252	1.74e-12	7	0	0	1	0	0	1	1	0	1	0	0	0	0	0	1	1	0	0	0	1	1	1	1	1	0	1
SL	7	99.1776	156512446	G/A	3.69366	1.71e-12	6	0	0	0	0	0	1	1	1	0	0	0	1	0	0	0	1	0	1	0	1	0	1	1	1	1	1
CD	7	100.323	157065144	-/T	-0.248453	1.23e-10	12	0	0	1	0	0	0	0	0	1	1	1	0	0	0	1	1	0	0	0	1	0	0	0	0	0	1
BN	7	102.743	158232132	G/T	-0.37601	2.95e-11	26	0	0	0	0	0	0	0	0	0	1	0	0	0	0	0	0	0	0	0	1	1	0	0	1	1	1
TL	7	103.291	158496637	C/T	3.3424	6.13e-08	25	0	0	0	0	0	1	1	1	0	0	1	1	0	1	0	0	0	0	0	1	0	0	0	0	1	0
ERN	7	104.288	158977410	T/G	-0.118941	5.04e-13	38	1	1	1	1	1	0	1	0	1	1	1	1	1	0	1	1	1	1	1	0	1	1	1	0	1	0
CD	7	105.455	159519491	T/G	-0.196345	5.42e-11	34	0	0	1	0	1	0	0	0	0	1	1	0	1	0	1	1	1	0	0	0	0	1	0	1	0	1
SL	7	106.118	159784721	A/G	2.90416	7.08e-11	5	1	0	0	1	0	1	1	1	1	1	1	1	0	1	0	0	0	0	0	1	1	0	1	1	1	1
ERN	7	106.217	159824413	T/G	-0.128612	2.13e-10	12	1	1	1	1	0	0	1	0	0	1	1	0	1	0	0	1	0	0	1	0	0	1	1	1	1	0
SL	7	107.29	160253743	G/T	3.25502	8.79e-10	8	1	0	0	0	1	0	0	0	0	0	0	1	0	1	1	1	0	0	0	1	1	0	1	0	1	1
BZ	7	109.135	160992144	A/T	-1.93268	4.69e-14	15	1	1	1	1	1	1	0	1	1	1	1	1	1	1	0	0	0	0	1	1	1	1	1	1	0	1
SL	7	109.322	161067038	A/C	6.77266	1.13e-09	9	0	0	0	0	0	0	0	0	0	0	0	1	0	0	0	0	0	0	0	0	0	0	0	0	0	1
SL	7	109.847	161276855	ATC/---	3.34664	1.83e-11	14	0	1	0	0	1	1	0	0	1	0	0	1	0	1	1	0	0	0	0	1	1	0	1	1	0	1
BN	7	109.847	161276998	--/TG	-0.325348	9.63e-14	9	0	0	0	0	0	0	0	0	1	0	0	1	1	1	1	0	0	0	0	1	1	0	1	1	0	1
BZ	7	109.847	161276998	--/TG	-1.84482	5.52e-07	6	0	0	0	0	0	0	0	0	1	0	0	1	1	1	1	0	0	0	0	1	1	0	1	1	0	1
SL	7	109.847	161276998	--/TG	4.34431	7.28e-17	10	0	0	0	0	0	0	0	0	1	0	0	1	1	1	1	0	0	0	0	1	1	0	1	1	0	1
SL	7	109.883	161291484	G/A	3.35847	1.68e-11	6	1	0	0	0	0	0	0	1	0	0	0	1	0	1	0	0	0	1	1	0	0	1	1	1	1	1
BN	7	110.043	161355391	G/C	-0.380234	7.2e-13	12	1	0	1	1	1	0	1	1	1	1	1	0	1	1	1	0	0	0	0	1	1	0	1	1	0	1
BZ	7	110.044	161355938	G/C	-2.32045	3.39e-07	7	0	0	0	0	0	0	1	0	0	0	0	0	1	0	0	0	0	0	0	0	0	0	1	1	0	1
BN	7	110.21	161422159	G/A	-0.279948	6e-19	9	1	0	1	1	1	1	1	1	1	1	1	1	1	1	0	0	0	1	1	1	1	0	1	1	1	1
BZ	7	110.21	161422159	G/A	-1.99953	5.99e-15	17	1	0	1	1	1	1	1	1	1	1	1	1	1	1	0	0	0	1	1	1	1	0	1	1	1	1
SL	7	110.21	161422159	G/A	3.30788	4.68e-21	35	1	0	1	1	1	1	1	1	1	1	1	1	1	1	0	0	0	1	1	1	1	0	1	1	1	1
BZ	7	110.228	161429550	T/G	-2.1635	5.41e-20	26	1	1	1	0	1	1	1	1	1	1	1	1	1	1	1	0	0	0	1	1	1	1	1	1	0	1
BN	7	110.23	161430305	T/A	-0.263929	3.02e-15	20	1	1	1	0	1	1	1	1	1	1	1	1	1	1	1	0	0	0	1	1	1	1	1	1	0	1
SL	7	110.241	161434763	T/A	4.05081	7.05e-12	10	0	0	0	0	0	1	1	0	0	0	0	1	0	0	0	0	0	1	0	1	1	0	1	0	0	1
SL	7	110.396	161496628	-----/GTCCT	4.25768	4.55e-15	14	0	0	0	0	0	0	1	0	0	0	1	1	0	1	0	0	0	1	0	1	1	0	1	1	0	0
SL	7	110.402	161498959	G/T	2.9523	1.98e-12	5	0	1	1	0	1	0	0	1	1	1	0	1	0	0	0	0	0	0	1	1	1	1	1	1	1	1
SL	7	110.714	161623154	T/G	3.50531	2.96e-12	6	0	0	0	0	0	0	0	0	0	1	0	1	1	0	0	0	0	0	1	1	1	1	1	0	1	1
SL	7	110.715	161623410	T/C	3.12865	1.13e-12	9	1	0	1	0	0	0	1	1	0	1	0	1	0	0	0	0	0	0	1	1	1	1	1	0	1	1
BZ	7	110.72	161625213	G/C	-1.73917	6.54e-08	8	0	1	0	0	1	1	0	0	0	1	0	0	1	0	1	0	0	0	0	1	1	0	1	1	0	1
ERN	7	111.192	161786138	A/G	-0.116306	4.23e-11	11	0	0	1	1	0	0	1	1	1	1	0	1	1	0	1	1	0	1	1	1	1	1	1	0	1	0
BN	7	111.423	161864812	-/A	-0.438842	6.79e-12	12	0	0	0	0	0	0	1	0	0	0	0	1	0	0	1	0	0	0	0	0	0	0	0	0	0	1
BN	7	111.583	161919587	--/TC	-0.3275	1.73e-33	5	0	1	1	1	1	1	1	1	1	1	1	1	1	1	1	0	1	1	1	1	1	1	1	1	1	1
BN	7	112.207	162122830	C/T	-0.303899	6.88e-13	9	0	0	0	1	0	0	1	1	0	1	1	1	1	1	0	0	0	0	1	0	1	0	0	1	0	1
BN	7	112.331	162189881	G/C	-0.652557	8.52e-15	8	0	0	0	0	0	0	0	0	0	0	0	1	0	0	0	0	0	0	0	0	0	0	0	0	0	1
BN	7	112.679	162371263	G/C	-0.306371	2.78e-24	31	1	0	1	1	1	0	1	1	1	1	1	1	1	1	0	1	0	0	1	1	1	1	1	1	1	1
BZ	7	112.679	162371263	G/C	-1.79809	2.43e-13	11	1	0	1	1	1	0	1	1	1	1	1	1	1	1	0	1	0	0	1	1	1	1	1	1	1	1
ERN	7	113.03	162452399	---/TGT	-0.135945	5.04e-12	21	0	1	0	1	0	0	1	0	1	0	0	1	1	0	0	1	1	0	1	0	1	1	1	0	1	0
BN	7	114.057	162757910	G/A	-0.311359	4.66e-25	18	1	1	1	1	1	1	1	1	0	1	1	0	1	1	0	0	1	0	1	1	1	1	1	1	1	1
BN	7	114.401	162876885	G/T	-0.799309	2.65e-10	12	0	0	0	0	0	0	0	0	0	0	0	0	0	0	0	0	0	0	0	0	0	0	0	0	0	1
SL	7	114.404	162877706	T/A	4.79179	2.81e-08	5	0	0	0	0	0	0	0	0	0	0	0	1	0	0	0	0	0	0	0	0	0	0	1	0	0	1
BN	7	114.833	163072096	A/T	-0.408502	1.26e-14	8	0	1	0	0	0	0	0	0	0	1	0	1	0	0	0	0	0	0	0	0	1	0	0	0	1	1
ERN	7	115.051	163190710	C/A	-0.210322	2.88e-09	11	0	0	0	0	0	0	1	0	0	0	0	1	0	0	0	1	0	0	0	0	0	0	0	0	1	0
BZ	7	115.61	163520663	A/G	-2.00521	7.91e-18	19	1	1	1	1	1	0	1	0	1	1	1	1	1	1	1	1	0	0	1	1	1	0	1	1	0	1
ERN	7	115.93	163735437	C/G	0.157893	2.72e-09	7	0	0	0	1	0	1	0	0	1	0	0	0	0	1	0	0	1	0	0	1	0	0	0	1	0	1
BN	7	116.659	164223309	C/G	-0.227653	1.8e-09	7	0	0	1	0	1	0	1	0	0	1	1	1	1	1	0	0	1	1	0	1	1	0	1	1	1	1
BZ	7	116.706	164254984	T/C	-1.88708	1.8e-10	5	0	1	1	0	1	0	1	0	0	1	1	1	1	1	0	0	1	0	0	0	1	0	1	1	0	1
BZ	7	119.545	165328649	A/C	-1.668	1.97e-10	10	0	1	1	1	1	1	1	0	0	1	1	1	1	0	0	1	0	0	1	0	1	0	1	1	1	1
BZ	7	123.139	166494952	AGCT/----	-2.28348	1.14e-10	10	0	0	0	0	1	0	0	0	1	0	0	1	1	0	0	0	0	0	0	0	0	0	1	1	1	1
BZ	7	125.168	166961875	G/C	-1.52807	8.41e-09	12	0	1	1	0	1	1	1	1	1	1	1	1	1	0	0	0	0	1	1	1	1	1	1	1	1	1
BZ	7	126.345	167232757	C/T	-1.79681	3.41e-12	8	0	1	1	0	1	0	1	1	0	1	1	1	1	1	0	0	1	1	0	1	1	0	1	1	1	1
BZ	7	129.677	167999398	-----/GACAG	-1.61244	9.61e-10	6	0	1	1	1	0	1	0	1	1	1	1	1	1	1	0	0	0	0	0	1	1	0	1	1	1	1
CD	7	129.883	168046705	C/G	0.304861	1.18e-08	6	0	1	0	1	0	0	0	1	0	0	0	1	0	0	0	0	0	0	0	0	0	0	0	0	0	0
CD	7	130.367	168158240	C/G	0.248244	1.87e-07	9	0	1	0	1	1	0	0	0	0	0	0	1	0	1	0	0	0	0	0	0	0	0	0	0	0	0
CD	7	133.201	168810231	---/TGT	0.278262	3.72e-08	30	0	1	0	0	0	0	0	1	0	0	0	0	1	0	0	0	0	0	0	1	0	0	0	0	0	0
CD	7	134.403	169413302	T/G	0.209441	1.57e-07	9	0	1	0	1	0	0	0	0	0	0	0	1	1	0	0	0	0	0	0	1	1	0	0	0	0	0
CD	8	5.33633	2310274	A/-	-0.127513	1.21e-07	11	0	1	1	1	1	1	1	0	1	1	1	1	1	0	1	0	0	1	1	1	1	1	1	0	1	1
CD	8	16.7311	5548953	T/C	-0.150218	7.01e-08	5	0	1	1	1	0	0	0	0	1	1	0	1	1	0	0	0	0	0	0	1	1	1	0	1	1	1
BZ	8	17.5462	5930888	-----/AGCTA	-1.60409	3.51e-07	9	0	1	0	0	1	0	0	1	1	0	0	0	0	0	1	0	0	1	0	1	0	0	0	0	0	1
BZ	8	18.5395	6802957	T/C	-1.19923	7.62e-08	5	1	0	0	0	1	1	1	1	1	0	0	1	0	1	0	0	1	1	1	1	1	1	1	0	0	1
BZ	8	18.5491	6808685	C/T	-0.955379	4.36e-07	5	1	1	1	1	1	1	1	1	1	0	0	1	1	1	1	0	1	1	1	1	1	1	1	0	1	1
TL	8	19.5159	7388284	A/G	-3.27271	3.71e-07	6	0	0	0	0	1	0	0	0	0	0	1	0	0	0	1	0	0	0	0	0	1	0	1	1	0	1
TL	8	19.5534	7410721	A/G	-3.5047	5.14e-08	5	1	1	0	0	0	0	0	0	0	0	0	0	0	0	1	0	0	0	0	1	1	0	1	0	1	0
SL	8	26.5159	10303752	C/T	3.80768	5.19e-08	9	1	0	0	0	1	0	0	0	0	0	0	0	0	0	0	1	0	0	1	0	0	1	0	0	0	0
TL	8	27.7354	10739489	C/T	3.97933	3e-09	8	1	0	0	0	0	0	1	0	0	1	0	0	1	0	0	0	1	0	1	0	0	1	0	0	1	0
TL	8	30.1502	11602415	G/A	3.88487	1.53e-09	15	1	0	0	0	1	0	1	0	0	0	0	0	1	0	0	0	1	1	0	0	0	0	0	0	1	0
ERN	8	32.3271	12688626	C/T	-0.173508	1.25e-09	8	0	0	0	0	0	1	0	0	0	1	0	1	0	1	0	0	0	0	1	0	0	0	0	1	0	0
SL	8	34.3128	13388454	C/T	-3.59422	7.96e-08	6	0	0	0	0	0	0	0	0	0	0	1	0	0	1	1	0	0	0	0	0	0	0	1	1	0	0
TL	8	34.3128	13388454	C/T	-4.04602	1.29e-07	14	0	0	0	0	0	0	0	0	0	0	1	0	0	1	1	0	0	0	0	0	0	0	1	1	0	0
CL	8	34.4195	13426028	G/C	2.40077	2.28e-07	8	0	0	0	0	0	0	0	0	0	0	0	0	1	0	0	0	1	0	1	0	0	0	0	0	0	0
ERN	8	35.0799	13658770	G/A	-0.211744	2.93e-09	10	0	0	0	1	0	1	0	0	0	1	0	0	0	0	1	0	0	0	0	0	0	0	0	0	0	0
ERN	8	35.6542	13861170	G/A	-0.240357	3.6e-11	5	0	0	1	1	0	1	0	0	0	1	0	0	0	0	0	0	0	0	0	0	0	0	0	0	0	0
SL	8	35.8816	13941300	T/C	-3.68547	4.96e-07	7	0	0	0	0	0	0	0	0	0	0	1	0	0	1	0	0	0	0	0	1	1	0	0	0	0	0
BN	8	37.3173	14925554	A/G	0.250804	6.14e-08	8	0	1	1	0	1	0	1	0	0	0	0	0	1	0	1	0	0	0	0	1	0	0	0	0	0	1
BN	8	39.3153	16797195	T/A	0.354694	3.47e-09	26	0	0	1	0	0	0	0	0	0	0	0	0	1	0	0	0	0	0	0	0	0	0	0	1	0	1
BN	8	39.8206	17111313	G/A	0.412033	1.48e-10	5	0	0	0	0	1	0	0	0	0	0	0	0	0	1	1	0	0	0	0	0	0	0	0	0	0	1
ERN	8	40.388	17464056	A/C	-0.211161	2.53e-09	21	0	0	0	1	0	0	0	0	0	1	0	0	0	0	1	0	0	0	0	0	0	0	0	1	0	0
ERN	8	40.7761	17705385	G/A	-0.211248	2.41e-09	34	0	0	0	0	0	1	0	0	0	1	0	0	0	0	1	0	0	0	0	0	1	0	0	0	0	0
ERN	8	41.7567	18315017	G/T	0.297713	8.09e-20	9	1	0	1	0	0	0	0	0	0	0	0	0	1	0	0	0	1	0	0	0	0	1	0	0	0	0
BN	8	41.8337	18362883	T/G	0.26971	2.29e-09	5	1	0	1	1	0	0	1	1	1	1	0	0	0	0	0	0	0	0	0	1	1	0	0	1	0	1
ERN	8	41.9936	18462311	C/T	0.142246	1.02e-06	5	0	1	0	1	0	0	1	0	0	0	0	0	0	1	0	0	1	0	0	0	0	0	1	0	0	0
BN	8	42.8673	19011346	C/T	0.434319	5.03e-09	6	1	0	0	0	0	0	1	0	0	0	0	0	1	0	0	0	0	0	0	0	0	0	0	0	0	0
ERN	8	43.0978	19156179	T/G	0.337627	2.59e-20	56	1	0	1	0	0	0	0	0	0	0	0	0	1	0	0	0	0	0	0	0	0	1	0	0	0	0
ERN	8	43.2781	19269492	G/-	0.349081	6.72e-22	30	1	0	1	0	0	0	0	0	0	0	0	0	1	0	0	0	0	0	0	0	0	1	0	0	0	0
BN	8	43.9748	19707328	T/C	0.394818	2.76e-31	50	1	0	0	1	1	0	1	1	1	0	0	0	0	1	1	1	1	0	0	1	1	0	1	0	0	1
BN	8	44.1939	19845043	T/C	0.228252	7.26e-09	9	1	1	0	1	1	0	1	1	1	1	1	1	1	1	1	1	0	0	1	1	1	0	0	1	0	1
BN	8	44.2699	19892839	G/A	0.290014	9.92e-10	40	0	0	1	1	1	1	1	1	0	0	0	0	0	1	1	0	0	0	0	1	1	0	0	1	0	1
BN	8	45.6082	20733865	G/A	0.31376	1.61e-21	14	1	0	1	1	1	0	1	1	1	1	1	0	1	1	1	1	0	0	0	1	1	0	1	1	0	0
CD	8	45.6162	20738936	C/G	-0.24214	1.07e-16	19	0	0	0	1	1	1	1	1	1	1	1	1	0	0	1	0	0	1	1	1	1	0	0	1	0	1
BZ	8	45.9725	20962809	T/C	1.26808	2.03e-07	5	1	1	1	1	1	0	1	0	0	1	1	1	1	1	1	1	0	0	0	1	0	0	1	0	0	1
BZ	8	47.374	21843641	C/A	2.13662	5.98e-08	13	0	0	0	0	0	0	1	0	0	1	0	0	0	1	1	1	0	0	0	0	0	0	0	0	0	0
CD	8	48.0615	22170222	A/G	-0.260561	4.73e-12	15	0	0	0	0	0	1	1	0	1	1	1	1	0	0	0	0	0	0	0	0	0	1	0	1	0	0
CD	8	49.8161	23707990	T/-	-0.235525	2.49e-20	15	0	1	0	1	1	1	1	1	1	1	1	1	1	1	1	0	0	1	1	1	1	1	0	1	1	1
CD	8	50.5844	24728439	G/A	0.31733	3.77e-10	5	0	0	1	1	1	0	0	0	0	0	0	0	1	0	0	0	0	0	0	1	0	0	0	0	0	0
BZ	8	50.8059	27496605	C/T	2.58808	1.12e-08	10	0	0	0	0	0	0	1	0	0	0	0	0	0	1	0	1	0	0	0	0	0	0	0	0	1	0
TL	8	50.9931	29995919	G/A	2.8728	7.17e-09	26	0	0	1	0	1	1	1	0	1	0	0	0	1	1	0	1	0	1	0	1	1	1	0	0	1	0
BZ	8	51.1297	31819390	C/G	2.02172	3.06e-08	6	0	0	1	0	0	0	1	0	0	1	0	0	1	0	1	0	0	0	0	0	0	0	0	0	1	0
CD	8	51.2455	33364372	G/A	-0.295242	1.73e-25	17	0	1	1	1	1	1	1	1	1	1	1	1	1	0	1	0	0	0	1	1	1	1	0	1	0	1
CD	8	51.4809	36507758	G/-	-0.299128	3.49e-24	7	0	0	0	0	0	0	1	0	1	1	1	1	0	1	1	0	0	1	1	0	1	1	0	1	0	1
CD	8	52.5737	57835501	G/A	-0.24534	3.18e-12	8	0	0	0	1	0	1	1	1	1	1	1	0	0	0	0	0	0	0	0	0	1	0	0	1	0	1
BZ	8	53.688	71995422	C/G	-3.24717	3.34e-10	10	0	0	0	0	0	0	0	0	1	0	0	0	0	0	0	0	0	1	0	0	0	0	1	0	0	0
BZ	8	54.659	81752490	C/A	-2.84987	1.08e-12	7	1	0	0	0	0	0	0	0	0	0	1	1	0	0	0	0	0	1	0	0	0	0	1	0	0	0
BZ	8	58.1221	101281827	A/T	-2.97164	1.83e-08	6	1	0	0	0	0	0	0	0	1	0	0	0	0	0	0	0	0	0	0	0	0	0	1	0	0	0
BZ	8	59.5146	105265116	G/C	-2.67208	2.38e-07	8	1	0	0	0	0	0	0	0	0	0	0	0	0	0	0	0	0	1	1	0	0	0	0	0	0	0
CD	8	60.5822	108849362	A/C	-0.179889	2.06e-11	5	0	1	1	0	1	1	1	1	1	1	1	1	1	1	1	0	0	1	1	1	1	0	0	1	0	1
CD	8	60.5823	108849585	T/C	-0.204067	8.31e-15	31	0	1	1	0	1	1	1	1	1	1	1	1	1	1	1	0	0	1	1	1	1	0	0	1	0	1
TL	8	60.6322	109022474	C/A	-4.7539	1.45e-13	72	0	0	0	0	0	1	0	0	1	0	1	1	0	1	0	0	0	0	0	1	1	0	0	0	0	0
BZ	8	60.8784	109874615	G/T	-3.5921	2.09e-15	14	0	0	0	0	0	0	0	0	0	0	1	1	0	0	0	0	0	0	1	0	0	0	0	1	0	0
CL	8	61.9431	113946654	G/T	-1.84425	1.17e-07	11	0	0	0	1	0	0	0	1	1	0	0	1	0	0	0	1	0	0	0	0	0	0	0	0	0	0
CL	8	61.9431	113946667	T/C	-1.85459	9.87e-08	23	0	0	0	1	0	0	0	1	1	0	0	1	0	0	0	1	0	0	0	0	0	0	0	0	0	0
BZ	8	61.9444	113951624	G/A	-3.03266	3.5e-16	45	0	0	0	0	0	0	0	0	1	0	1	1	0	0	0	1	0	0	1	0	0	0	0	1	0	0
BZ	8	61.9454	113955315	G/-	-3.31401	6.06e-13	16	0	0	0	0	0	0	0	0	1	0	1	1	0	0	0	0	0	0	0	0	0	0	0	1	0	0
CL	8	61.9637	114022311	G/T	-2.13948	2.62e-08	8	0	0	0	0	0	1	0	1	0	0	0	0	1	0	0	1	0	0	0	0	0	0	0	0	0	0
CL	8	61.9862	114104834	C/T	-2.61134	6.81e-09	16	0	0	0	0	0	0	0	1	1	0	0	0	1	0	0	0	0	0	0	0	0	0	0	0	0	0
TL	8	62.9279	116217907	A/G	-5.88735	1.05e-09	5	0	0	0	0	1	0	0	0	0	0	1	1	0	0	0	0	0	0	0	0	0	0	0	0	0	0
BZ	8	64.5502	119266124	C/G	-3.43578	4.07e-14	6	0	0	0	0	0	0	0	0	0	0	1	1	0	0	0	0	0	0	1	0	0	0	0	1	0	0
TL	8	64.6245	119392802	A/C	-7.77273	4.2e-11	13	0	0	0	0	0	0	0	0	0	0	1	1	0	0	0	0	0	0	0	0	0	0	0	0	0	0
CD	8	66.3158	122277159	C/T	-0.238269	4.49e-11	5	0	0	0	0	0	1	1	1	1	0	0	0	0	0	1	0	1	0	1	1	1	0	0	0	0	1
CD	8	66.3565	122346540	G/A	-0.211061	4.54e-08	6	0	0	0	1	0	1	1	1	1	0	0	0	0	1	1	0	1	0	0	0	1	0	0	0	0	1
CD	8	66.4085	122435121	T/G	-0.215746	2.14e-11	8	0	0	1	1	0	1	1	1	1	0	1	0	0	1	1	0	1	0	1	0	1	0	0	0	0	1
BN	8	67.1546	123914562	T/C	-0.345253	4.16e-15	25	0	0	0	0	0	0	0	0	0	0	1	1	0	0	0	1	1	0	1	0	1	0	0	1	0	1
BN	8	67.1548	123915314	G/A	-0.363705	1.76e-15	32	0	0	0	0	0	0	0	0	0	0	1	1	0	0	0	1	1	0	1	0	0	0	0	1	0	1
CL	8	67.657	127208333	G/T	-1.32081	6.5e-08	10	0	0	0	1	0	1	1	1	1	1	0	1	0	1	0	1	0	1	0	0	0	0	0	0	1	0
SL	8	67.8006	127796651	A/T	6.64293	3.89e-10	5	0	0	0	0	0	0	0	0	0	0	0	0	0	0	0	0	0	0	0	0	0	0	1	1	0	0
BN	8	68.0757	128837601	C/T	-0.273514	2.09e-15	41	1	0	0	1	0	1	1	0	0	0	1	1	0	0	1	1	1	0	1	0	1	0	0	1	0	1
CL	8	69.3813	132619824	T/C	-1.45547	4.69e-08	6	0	1	0	0	0	1	0	1	1	0	0	1	1	1	0	1	1	0	0	0	0	0	0	0	0	0
SL	8	69.4067	132689840	A/C	-2.84084	8.02e-08	6	0	0	1	0	0	0	1	0	0	0	1	0	0	1	0	0	0	1	1	0	1	0	0	0	1	0
CD	8	69.4352	132768519	T/C	-0.235346	3.83e-12	25	0	1	1	0	0	1	1	1	1	0	1	0	0	0	0	0	0	0	1	0	1	0	0	0	0	1
SL	8	70.2225	135732143	G/C	3.27742	1.3e-09	10	0	1	0	0	0	0	0	1	0	1	1	0	0	0	0	1	1	0	0	0	0	0	1	1	0	0
SL	8	70.5707	137345083	------/TTCCAC	3.36785	9.04e-10	13	1	0	0	0	0	0	0	1	0	0	0	0	0	0	1	1	0	0	0	0	0	0	1	1	1	0
SL	8	71.5726	140137842	-/T	4.46274	1.29e-09	37	1	0	0	0	0	0	0	1	0	0	0	0	0	0	0	1	0	0	0	0	0	0	1	0	0	0
CD	8	75.0532	145237840	G/C	-0.364115	2.73e-12	14	0	0	0	0	0	1	1	0	1	0	0	0	0	0	0	0	0	0	0	0	0	0	0	0	0	1
CL	8	76.6667	147048651	G/A	1.6616	3.5e-07	5	1	0	0	0	0	0	0	0	0	0	0	1	0	0	1	0	0	1	1	0	0	0	1	0	0	1
CD	8	80.38	151663352	G/C	-0.400438	7.11e-11	17	0	0	0	0	0	0	1	1	0	0	0	0	0	0	0	0	0	0	0	0	0	0	0	0	0	1
CL	8	81.0084	152810886	G/A	-1.94106	4.32e-11	8	0	0	0	0	0	1	1	0	1	1	0	0	0	1	1	1	0	0	0	0	0	0	0	0	0	0
CD	8	81.0628	152982079	G/A	-0.34004	3.08e-11	5	0	0	0	0	0	1	1	1	1	0	0	0	0	0	0	0	0	0	0	0	0	0	0	0	0	0
CD	8	81.3272	153813786	C/T	-0.230311	1.22e-09	9	0	0	1	0	0	1	1	1	1	0	1	0	0	0	0	0	0	0	0	0	1	0	0	0	0	1
ERN	8	83.5723	156659238	A/G	0.129944	5.3e-07	5	1	0	1	0	1	0	0	0	0	0	0	1	1	0	1	0	0	0	0	0	1	0	1	0	0	0
SL	8	85.2664	157699880	G/C	-3.77777	1.79e-16	14	0	0	0	1	1	1	0	1	1	0	1	0	0	1	0	0	0	1	1	0	1	1	0	1	1	0
CL	8	85.9327	158109211	C/G	-1.46072	2.9e-13	21	1	0	0	0	1	1	1	1	1	1	0	0	0	1	1	1	0	1	1	0	1	0	1	0	1	1
CL	8	86.1583	158247760	A/G	-1.36798	2.11e-12	14	1	1	1	1	1	0	1	1	1	1	0	0	1	1	1	1	0	0	1	0	1	0	0	0	1	1
CL	8	86.233	158293620	A/G	-1.3568	5.44e-14	12	1	1	1	1	1	1	1	1	1	1	0	1	1	1	1	1	0	1	1	0	1	0	0	0	1	1
CL	8	86.5659	158498117	T/G	-1.39323	9.47e-14	14	1	0	1	0	1	1	1	1	1	1	0	1	1	1	1	1	0	0	1	0	1	1	0	0	1	1
ERN	8	86.5813	158507582	G/A	0.170956	2.36e-07	11	1	0	1	0	0	0	0	0	0	0	0	0	1	0	0	1	0	0	0	0	1	0	0	0	0	0
CL	8	86.5855	158510179	A/G	-1.56912	9.28e-13	14	0	0	1	1	0	1	1	0	1	1	0	0	1	1	1	0	0	0	1	0	1	0	0	0	1	1
CL	8	86.7292	158598450	C/G	-1.51485	5.81e-13	5	1	1	1	1	1	1	0	0	1	1	0	0	1	1	0	1	0	0	1	0	1	0	0	0	1	0
CD	8	86.7312	158599648	T/A	-0.345459	5.89e-09	25	0	0	0	0	0	0	1	1	0	0	0	0	0	0	0	0	0	0	0	0	0	0	0	0	0	1
SL	8	86.7945	158638562	C/T	-4.00216	1.52e-10	14	0	0	0	0	1	1	0	1	0	0	0	1	0	1	0	0	0	0	1	0	0	0	0	0	0	0
SL	8	86.8476	158671192	T/C	-4.54961	4.22e-14	7	0	0	1	0	1	0	0	1	1	0	0	0	1	0	0	0	0	0	0	0	0	0	0	0	1	0
SL	8	86.8761	158688693	G/A	-3.73444	3.09e-09	7	0	0	1	0	1	0	0	1	0	0	0	0	0	0	0	0	0	0	0	0	1	0	0	1	1	0
SL	8	87.2477	158916929	T/C	-5.84523	2.62e-15	36	0	0	0	0	1	0	0	1	1	0	0	0	0	0	0	0	0	0	0	0	0	0	0	0	1	0
TL	8	87.2477	158916929	T/C	-5.03472	2.41e-09	81	0	0	0	0	1	0	0	1	1	0	0	0	0	0	0	0	0	0	0	0	0	0	0	0	1	0
SL	8	89.3214	160422294	C/A	-3.77693	3.59e-11	37	0	0	0	0	0	1	0	1	0	1	1	0	0	1	0	0	0	0	1	0	0	0	0	1	0	0
SL	8	89.4906	160530182	A/G	-4.00074	1.48e-13	13	0	0	0	0	1	1	0	1	1	1	0	0	1	1	0	0	0	1	0	0	0	0	0	0	0	0
ERN	8	90.8647	161236631	G/A	0.0978782	8.63e-08	26	1	1	1	0	0	1	0	0	0	1	1	1	1	1	1	1	1	0	1	0	1	1	1	1	0	1
ERN	8	92.0858	162428579	C/T	0.117772	1.04e-07	6	1	0	1	0	0	0	0	0	1	1	0	0	0	1	1	1	0	0	0	0	1	1	0	1	0	1
SL	8	92.8688	162684745	C/T	-4.08692	1.08e-12	19	0	0	1	0	1	1	0	0	1	0	0	0	0	1	0	0	0	1	0	0	0	0	0	0	1	0
SL	8	92.9619	162713668	---/TCT	-2.59382	9.39e-12	7	0	1	1	1	1	1	0	1	1	1	1	0	0	1	1	1	0	0	0	0	1	1	1	1	1	0
BN	8	93.5433	162894175	G/A	0.225134	2.78e-11	5	0	1	0	0	1	1	0	0	0	0	1	1	0	1	1	0	1	0	1	0	1	0	1	1	1	0
BN	8	94.1607	163087191	-/G	0.194842	1.4e-10	27	0	1	1	0	1	0	0	0	1	0	1	1	0	1	1	0	1	1	1	1	1	0	1	1	1	0
BN	8	94.3264	163142239	C/-	0.190988	2.28e-09	10	0	1	1	1	1	1	0	0	1	0	0	1	1	1	0	0	1	1	1	0	1	0	0	1	1	0
TL	8	94.8879	163328744	G/C	7.29587	8.08e-10	23	0	0	0	0	0	0	0	0	0	0	0	0	0	0	0	0	0	1	0	1	0	0	0	0	0	0
BZ	8	95.383	163493191	G/T	2.78505	4.17e-10	13	0	0	0	0	0	0	0	0	0	0	0	0	0	1	0	0	0	1	1	0	0	0	0	0	1	0
BZ	8	95.5992	163564982	T/C	3.35117	8.58e-14	5	0	0	1	0	0	0	0	0	0	0	0	0	0	0	0	0	0	1	0	1	1	0	0	0	0	0
BZ	8	95.6218	163574319	T/A	2.0773	2.59e-16	14	1	0	1	1	0	1	0	0	0	1	1	0	1	1	1	1	0	1	1	0	1	0	1	1	1	0
BZ	8	95.7011	163607255	T/A	2.29093	5.38e-23	10	0	1	1	1	0	0	0	1	0	1	0	1	1	1	1	1	1	0	1	1	1	0	0	1	0	0
BZ	8	95.7861	163642601	G/C	2.41144	3.2e-25	32	0	1	1	1	0	1	0	1	1	1	1	1	1	0	1	1	0	1	0	1	1	1	0	1	0	0
BZ	8	95.7902	163644284	C/G	2.6895	8.02e-17	5	0	0	0	0	1	1	0	0	0	1	0	1	1	0	1	1	0	1	0	0	0	0	0	0	0	0
BZ	8	96.28	163847825	G/A	-2.39069	3.1e-07	5	0	1	0	0	1	0	1	1	0	0	0	0	0	0	0	0	1	0	0	0	0	0	0	0	0	0
BZ	8	96.3103	163860426	C/T	2.5031	1.13e-09	16	0	0	0	0	0	0	0	0	0	1	0	0	1	0	0	1	1	1	0	1	0	0	0	0	0	0
BZ	8	96.3403	163872912	G/A	2.45866	6.61e-30	5	0	1	1	1	0	1	1	1	1	1	1	1	1	0	1	1	1	1	1	1	1	1	0	1	1	0
BZ	8	96.7977	163969881	C/A	2.42347	4.08e-25	6	0	0	0	1	1	0	0	1	0	1	0	1	0	1	1	1	0	1	1	1	1	1	1	1	1	0
BZ	8	96.8262	163972809	G/A	2.8561	2.73e-08	5	0	0	0	0	0	0	0	0	0	0	0	0	0	1	0	1	0	1	0	0	0	0	0	0	0	0
BN	8	96.8599	163976277	G/A	0.172333	2.44e-09	6	0	1	1	1	1	1	1	1	0	1	1	1	1	0	1	0	1	1	1	1	1	0	0	1	1	0
BN	8	96.977	163988328	G/T	0.157381	8.93e-09	5	0	1	1	1	1	1	1	1	0	0	1	1	1	1	1	1	1	1	1	1	1	1	0	1	1	0
BZ	8	96.977	163988328	G/T	2.44395	2.05e-25	6	0	1	1	1	1	1	1	1	0	0	1	1	1	1	1	1	1	1	1	1	1	1	0	1	1	0
BZ	8	98.0747	164101231	G/T	5.33189	3.38e-09	8	0	0	0	0	0	0	0	0	0	0	0	0	0	0	0	0	0	1	0	0	0	0	0	0	0	0
BN	8	100.719	164920896	C/T	0.269136	6.79e-09	8	0	0	0	0	1	1	0	0	0	0	0	0	0	1	0	0	0	0	1	1	1	0	0	0	1	0
SL	8	102.211	165365651	G/C	-2.1454	5.41e-08	5	0	1	1	0	1	0	1	1	1	1	1	0	0	1	1	1	1	0	1	0	0	0	1	1	0	1
BN	8	103.907	165885591	G/A	0.202097	1.12e-09	7	0	0	1	0	0	1	0	0	0	1	1	1	1	1	1	0	1	1	1	1	1	0	0	1	0	0
ERN	8	104.22	166000663	CTA/---	0.156141	7.32e-24	14	1	1	1	1	1	1	0	0	1	1	1	1	1	1	1	1	1	1	1	1	1	1	1	1	0	0
ERN	8	105.416	166439497	A/C	0.159681	1.37e-24	22	1	1	1	1	0	0	1	0	1	1	1	1	1	1	1	1	1	1	1	1	1	1	1	1	1	1
ERN	8	106.199	166726829	--/TA	0.160034	1.38e-24	21	1	1	1	1	1	1	1	0	1	1	1	1	1	1	1	1	0	1	1	1	1	1	0	1	0	1
ERN	8	109.805	167665775	C/G	0.147205	7.31e-17	8	1	1	1	1	1	1	1	0	1	1	1	1	1	1	1	1	0	1	1	1	1	1	1	0	1	0
BZ	8	110.267	167774167	C/T	-1.58611	4.48e-09	16	1	1	0	0	1	0	1	0	1	1	1	0	1	0	1	0	1	0	0	1	0	1	0	1	1	1
ERN	8	110.849	167910846	C/G	0.153527	4.83e-17	31	1	1	1	1	1	0	0	0	0	1	1	1	1	1	1	1	1	1	1	1	1	1	1	0	1	0
TL	8	115.169	168924446	G/C	-4.40585	6.08e-09	10	0	1	0	0	0	0	0	0	1	0	0	0	1	0	0	0	0	0	0	0	0	1	1	0	0	1
TL	8	117.121	169382305	T/C	-2.65478	2.18e-08	6	0	1	0	0	1	0	0	1	1	1	0	0	1	1	1	1	1	0	0	1	0	1	1	1	1	1
BZ	8	121.187	170335790	C/G	-1.54934	2.21e-09	27	1	1	0	0	0	0	1	0	0	1	1	0	1	0	0	1	0	0	0	1	0	1	1	1	1	1
BZ	8	121.22	170340606	------/AACTAA	-2.20546	8.41e-09	10	1	0	0	0	0	0	0	0	0	1	0	0	0	0	0	0	0	0	0	0	0	1	1	1	1	0
BN	8	122.959	170596367	C/A	-0.304091	8.45e-13	22	0	1	0	1	1	0	0	0	1	0	1	0	0	0	0	0	1	0	0	0	0	1	1	1	0	1
BN	8	123.458	170698911	G/A	-0.263254	3.15e-08	5	0	0	0	0	0	0	0	0	1	1	0	0	0	0	1	0	0	0	0	1	0	1	1	0	0	1
BN	8	125.027	171106623	C/G	-0.453851	6.92e-08	6	0	0	0	0	0	0	0	0	0	0	0	0	0	0	0	0	0	0	0	0	0	1	0	0	0	1
BN	8	125.052	171112806	C/T	-0.26387	9.78e-09	8	0	0	0	0	0	0	0	0	0	1	1	0	1	0	0	1	1	0	0	0	0	1	0	1	0	1
TL	8	126.38	171447029	G/A	4.3464	1.28e-13	8	1	0	1	1	1	1	0	0	0	0	0	0	0	1	0	0	0	1	0	0	1	0	0	0	1	0
BN	8	126.624	171508375	G/T	-0.279346	1.01e-09	5	1	0	0	1	1	0	0	1	0	1	0	0	0	0	0	0	1	0	0	1	0	0	0	0	0	1
BZ	8	126.624	171508375	G/T	-1.7249	5.18e-08	5	1	0	0	1	1	0	0	1	0	1	0	0	0	0	0	0	1	0	0	1	0	0	0	0	0	1
BZ	8	126.625	171508679	TT/--	-2.02517	4.27e-08	15	1	0	0	0	1	0	0	1	0	1	0	0	0	0	0	0	1	0	0	1	0	0	0	0	0	0
BN	8	127.084	171624340	G/A	-0.280856	3.65e-08	17	0	0	0	0	0	0	0	0	1	0	1	0	0	0	0	0	0	0	0	0	0	1	1	1	0	1
TL	8	127.786	171799462	AAA/---	4.20758	2.06e-26	5	1	1	1	1	1	1	1	0	0	1	1	0	1	1	1	1	1	1	1	0	1	1	1	1	1	1
CD	8	128.084	171873482	C/G	0.256046	9.69e-31	17	0	1	1	1	0	1	1	1	1	0	1	1	1	1	1	1	0	0	1	0	1	1	1	1	0	1
CD	8	128.327	171933780	-----/GGCTG	0.257035	3.67e-30	67	0	1	1	0	1	1	1	1	1	0	1	1	1	1	1	1	1	0	1	0	1	0	1	1	0	1
BN	8	128.6	172001461	A/G	-0.320458	5.35e-08	6	1	0	0	0	0	0	0	1	0	1	0	0	1	0	0	0	0	0	0	0	0	0	0	0	0	0
TL	8	129.164	172141334	T/C	3.85237	1.11e-26	5	1	1	1	1	1	1	1	1	1	1	1	1	1	1	1	1	1	1	1	0	1	1	1	1	1	1
TL	8	129.173	172143631	G/A	3.76008	3.56e-26	31	1	1	1	1	1	1	1	1	1	1	1	1	1	1	1	1	1	1	1	0	1	1	1	1	1	1
CD	8	129.263	172165750	----/GCCG	0.297601	2.79e-26	11	0	1	1	0	0	1	1	1	0	0	0	1	0	1	1	1	1	0	0	0	0	1	1	0	0	1
BN	8	130.984	172592768	C/G	-0.240747	5.65e-13	55	1	1	0	1	1	1	0	1	1	1	0	0	1	0	0	0	1	0	0	1	1	0	0	1	1	1
SL	8	131.124	172627579	T/G	3.71812	1.55e-29	97	1	1	1	0	1	1	1	1	0	1	1	1	0	1	0	1	1	1	0	1	1	1	1	1	1	0
TL	8	132.405	172945201	ACTCCT/------	3.83679	6.77e-26	13	1	1	1	1	1	1	1	1	1	0	1	1	1	1	1	1	1	1	1	1	1	1	1	1	1	1
TL	8	132.735	173027065	T/-	4.22516	6.6e-21	11	1	1	1	1	1	0	0	0	0	0	1	0	0	1	0	0	0	1	1	0	1	1	1	1	1	0
BN	8	133.257	173156495	T/G	-0.235226	5.29e-14	21	1	1	0	1	1	1	0	1	0	0	1	0	1	0	0	1	1	0	0	1	1	1	0	1	1	1
ERN	9	-6.3988	1586836	-----/CACCT	0.230689	2.47e-07	7	0	0	1	1	0	0	0	0	0	0	0	0	0	0	0	0	0	0	0	1	0	0	0	0	0	0
CD	9	-4.14321	2421911	G/A	-0.182803	6.66e-18	40	1	1	1	1	0	1	1	1	1	1	1	1	1	0	1	1	1	1	1	0	1	1	1	1	0	1
CD	9	-3.38774	2701607	C/G	0.255426	6.15e-07	7	0	1	1	0	1	0	0	0	0	0	0	0	0	0	0	0	0	0	0	0	1	0	0	0	0	0
CD	9	-2.71088	2952198	T/C	-0.216951	1.49e-17	34	0	0	1	1	0	0	1	1	1	1	1	1	1	0	1	1	1	1	0	0	0	0	0	1	1	0
ERN	9	0.727697	4225246	A/G	-0.175255	1.06e-27	5	1	1	1	1	1	1	1	1	1	1	1	1	1	1	1	1	1	1	1	0	1	1	1	1	1	1
CD	9	1.04668	4343342	G/C	-0.203446	6.95e-17	11	0	0	1	0	0	1	1	0	0	1	1	1	1	0	1	1	1	1	1	1	0	1	0	1	1	1
ERN	9	1.15365	4382943	C/T	-0.132584	2.37e-07	8	0	0	0	0	0	1	0	1	1	0	0	1	1	0	1	0	1	0	1	0	1	1	0	1	0	0
ERN	9	1.74215	4600823	T/C	-0.182259	3.82e-30	18	1	1	1	1	0	1	1	1	1	0	1	1	1	1	1	1	1	1	1	1	1	1	0	1	1	1
CD	9	2.87771	5021236	C/T	-0.220955	4.56e-18	8	1	0	0	1	0	1	1	1	1	1	0	0	1	1	1	1	1	1	1	1	0	0	0	1	0	1
ERN	9	6.72429	6445337	T/C	-0.173442	3.12e-24	21	1	1	1	0	1	1	1	1	1	1	1	1	0	1	1	1	1	1	0	0	1	1	1	1	1	1
ERN	9	6.72518	6445667	A/G	-0.182023	1.5e-28	15	1	1	1	1	1	1	1	1	1	1	1	1	1	1	1	1	1	1	0	0	1	1	1	1	1	1
ERN	9	6.72613	6446020	G/C	-0.224518	4.15e-31	15	1	1	1	0	0	1	0	1	1	1	1	1	1	1	1	0	1	1	1	1	1	1	1	1	1	1
ERN	9	6.94642	6527576	A/G	-0.173147	9.56e-15	9	0	1	1	0	0	1	1	1	1	0	1	1	1	1	1	1	1	1	1	0	0	1	1	0	0	1
ERN	9	18.6262	11319358	CCAG/----	0.135626	1.09e-08	7	1	1	1	0	0	0	0	0	1	0	1	1	1	1	0	0	0	1	1	1	0	0	1	0	1	0
BN	9	22.1353	12800883	---/TAA	-0.502046	1.26e-12	46	0	0	0	0	0	0	0	0	0	1	0	0	0	0	0	0	0	0	1	0	0	0	0	0	1	0
SL	9	22.5863	13033725	C/A	3.09806	1.07e-16	25	1	1	0	1	1	1	1	0	1	0	0	0	1	0	1	1	1	1	0	0	0	1	0	1	1	1
TL	9	22.5863	13033725	C/A	2.42777	2.34e-08	8	1	1	0	1	1	1	1	0	1	0	0	0	1	0	1	1	1	1	0	0	0	1	0	1	1	1
SL	9	23.1784	13339488	T/C	2.89372	8.99e-19	12	1	1	0	1	1	1	1	1	1	1	1	1	1	1	1	1	0	1	0	1	1	1	0	1	1	1
SL	9	23.2608	13382007	C/T	2.73012	8.14e-16	5	0	1	1	1	1	1	1	0	1	1	0	1	1	1	0	1	1	1	1	1	1	1	0	0	1	1
SL	9	23.8574	13697243	G/A	2.47404	6.84e-16	5	1	1	0	1	1	1	1	0	1	1	1	1	1	1	1	1	1	1	1	1	1	1	1	1	1	1
TL	9	24.398	14043541	C/T	2.42642	2.27e-09	8	0	1	0	1	1	0	1	1	1	1	1	1	1	0	1	1	1	1	1	1	0	0	1	0	1	1
BN	9	24.3989	14044115	G/T	-0.196339	9.52e-12	6	1	1	0	1	1	1	1	0	1	1	0	1	1	1	1	1	1	1	1	0	1	1	1	0	1	1
SL	9	24.6481	14203733	------/CGCGGT	3.069	1.11e-14	6	0	1	0	1	0	1	0	1	1	1	0	1	1	0	0	1	0	1	1	1	0	0	0	0	1	1
SL	9	24.6706	14218168	A/G	2.98833	8.33e-16	11	0	1	0	1	0	1	1	0	1	1	0	1	0	1	1	1	1	1	0	0	0	1	1	1	1	1
TL	9	24.8038	14303459	----/TTGT	3.15952	1.45e-09	7	0	1	0	0	1	1	0	0	1	0	1	0	0	1	1	1	0	1	0	1	0	0	0	0	1	0
SL	9	24.8041	14303671	T/G	2.70205	3.28e-06	5	0	1	0	1	0	1	0	0	1	0	0	0	0	0	0	1	0	1	0	1	0	0	0	0	1	0
ERN	9	25.0134	14437756	G/A	0.165064	1.07e-08	7	0	1	1	1	0	0	0	1	0	0	0	0	0	0	0	1	0	1	0	1	0	0	0	0	0	0
BN	9	25.8828	14994681	T/C	-0.304804	1.08e-11	14	0	1	0	0	0	1	0	0	0	1	0	0	0	1	1	0	0	0	0	0	0	1	1	0	1	0
CL	9	25.9846	15059898	T/C	1.21881	3.35e-07	7	0	1	0	1	0	0	1	1	0	0	0	1	0	0	0	1	1	0	0	1	1	0	0	1	0	1
SL	9	28.2939	16150344	C/T	2.72461	4.66e-15	7	1	1	0	0	0	1	1	1	1	1	0	1	1	1	0	1	1	1	1	1	0	1	0	1	1	1
BN	9	28.2967	16151415	-----/TGGAG	-0.342194	3.61e-12	5	0	0	0	0	0	0	0	0	0	1	0	0	1	1	0	0	0	0	0	0	0	1	1	0	1	0
BN	9	29.6167	16670039	G/A	-0.330479	5.42e-14	5	1	0	0	0	0	0	0	0	1	1	0	0	1	0	0	0	0	0	1	1	0	1	0	0	1	0
CL	9	29.628	16674509	G/C	1.23095	1.62e-07	7	1	1	1	1	1	1	1	1	0	0	0	1	0	0	0	0	0	0	0	0	1	0	0	0	0	1
BN	9	29.6281	16674561	G/T	-0.316015	1.15e-12	5	0	0	0	0	0	0	0	0	1	1	0	0	1	0	1	0	0	0	1	1	0	1	0	0	1	0
SL	9	30.3908	16975969	T/C	2.96193	7.29e-09	9	1	1	0	0	0	1	1	0	1	0	0	0	0	0	0	1	0	1	0	0	0	1	0	0	0	1
BZ	9	43.0861	26138816	G/C	-2.42144	1.58e-16	26	1	1	0	1	1	0	0	0	1	0	0	1	1	0	0	1	0	0	1	0	0	1	0	0	1	0
SL	9	44.6244	30109674	A/G	-3.82047	6.38e-21	7	1	0	0	1	1	0	1	1	0	1	1	0	1	1	0	0	0	1	0	1	1	1	0	0	1	1
TL	9	44.6609	30573078	G/C	-5.18998	2.97e-12	7	0	0	0	0	0	0	0	1	0	0	1	0	0	1	0	0	1	0	0	0	0	0	1	0	0	0
SL	9	44.6982	31047187	C/T	-2.94452	7.95e-17	6	1	0	1	1	1	1	1	1	0	1	1	1	1	1	1	1	1	1	1	1	1	1	1	1	1	1
TL	9	44.6982	31047187	C/T	-3.95549	6.07e-14	9	1	0	1	1	1	1	1	1	0	1	1	1	1	1	1	1	1	1	1	1	1	1	1	1	1	1
SL	9	44.8064	32421175	T/C	-3.31917	1.56e-20	9	1	0	1	0	1	0	0	1	1	1	1	1	1	0	1	0	1	1	1	1	1	1	0	0	1	1
BZ	9	45.1322	36560021	C/G	-2.82425	1.42e-09	8	0	0	0	1	0	0	0	1	1	0	0	0	0	0	0	0	0	1	0	0	0	0	0	0	0	0
CD	9	45.2945	42555300	C/T	-0.283226	1.59e-07	5	0	0	0	0	0	0	0	1	0	1	0	0	0	0	0	0	0	0	0	0	1	0	0	0	1	0
ERN	9	45.2954	42601876	---/CCA	-0.202493	3.93e-12	33	0	0	0	1	0	0	1	0	0	0	0	0	0	0	1	0	1	0	0	0	1	0	0	0	0	1
BZ	9	45.33	43973008	A/G	-2.33485	3.92e-24	14	1	0	0	1	1	1	1	1	1	0	0	1	1	1	1	1	1	1	1	1	1	1	0	0	1	1
TL	9	45.3434	44473310	T/C	-3.13484	4.75e-10	8	1	0	1	1	0	0	1	1	1	1	1	1	0	1	1	1	1	1	0	0	1	1	0	0	1	0
SL	9	45.3817	45908337	A/T	-4.24603	4.69e-20	33	0	0	1	0	1	0	1	0	0	0	1	0	0	1	0	1	0	1	0	0	1	1	1	1	1	0
BZ	9	45.3854	46043979	C/A	-3.40513	8.45e-11	9	0	0	0	0	0	0	1	1	0	0	0	0	0	0	0	0	0	0	0	0	1	0	0	0	0	0
BZ	9	45.4106	47157055	G/T	-2.94893	4.54e-26	6	1	1	0	1	1	1	1	1	1	0	0	1	1	1	1	1	1	1	1	1	1	1	0	0	1	1
ERN	9	45.4177	47533047	C/G	-0.268307	1.05e-10	11	0	0	0	0	0	0	1	0	0	0	0	0	0	0	0	0	0	0	0	0	1	1	0	0	0	0
CD	9	45.4596	49769254	T/C	-0.167685	1.86e-08	8	0	0	1	1	0	0	0	1	0	1	1	1	1	0	0	0	0	1	0	1	1	0	0	1	0	1
BZ	9	45.4815	50934708	G/T	-2.15357	6.57e-11	6	0	0	0	1	1	0	1	1	1	0	0	1	1	0	0	0	1	0	0	0	1	0	0	0	0	0
TL	9	45.4842	51080779	G/T	-4.52124	3.41e-16	14	1	0	0	1	0	0	1	1	0	1	0	0	0	1	0	1	1	0	0	0	1	0	1	0	0	0
BZ	9	45.6372	59240823	A/C	-2.17286	1.14e-09	10	0	0	0	0	1	0	1	0	0	0	1	0	1	0	0	1	0	0	1	0	1	1	0	0	1	0
TL	9	45.6372	59240823	A/C	-5.41592	1.79e-18	92	0	0	0	0	1	0	1	0	0	0	1	0	1	0	0	1	0	0	1	0	1	1	0	0	1	0
BZ	9	45.6459	59700495	T/C	-2.67406	5.33e-22	24	1	1	0	0	0	0	1	0	0	0	0	1	1	0	1	1	0	0	1	0	1	1	0	0	1	1
CD	9	45.7911	67444443	G/C	-0.349913	1.65e-12	11	0	0	0	0	0	0	0	0	0	0	0	1	0	0	0	0	1	0	0	0	1	0	0	1	0	0
BZ	9	45.8114	68526603	C/T	-2.38335	2.68e-09	11	0	0	0	0	0	0	1	1	1	0	0	1	1	0	0	0	0	0	0	0	1	0	0	0	0	0
ERN	9	45.8492	70542706	G/A	-0.224778	3.62e-08	5	0	0	0	0	0	0	0	0	0	0	0	0	0	0	0	0	0	0	0	0	0	1	0	1	0	1
BZ	9	45.8683	71559650	A/G	-2.34954	2.41e-14	8	1	0	0	0	0	0	0	0	0	0	0	1	1	1	1	1	0	0	1	0	1	1	0	0	1	0
CD	9	45.9367	74026215	C/T	-0.293811	4.89e-11	6	0	0	0	0	0	0	0	0	0	1	1	1	0	0	0	0	1	0	0	0	0	0	0	1	0	0
CD	9	46.1833	80172868	G/A	-0.261728	1.95e-13	9	0	0	0	0	1	0	1	0	0	1	0	1	1	0	0	0	0	0	0	0	1	0	0	1	0	1
SL	9	46.6578	86074691	A/C	-3.64791	8.16e-20	18	0	0	1	0	1	0	1	1	0	1	1	1	1	1	0	1	1	0	1	1	1	1	1	1	1	0
SL	9	46.7793	86778976	T/C	-3.89245	9.41e-13	15	1	0	0	0	0	0	0	0	0	0	1	0	1	0	0	1	1	0	0	1	0	1	1	0	0	0
CL	9	46.7979	86886495	A/T	-3.23499	1.39e-09	9	0	0	0	0	0	0	0	0	0	0	1	0	0	0	0	0	0	0	0	0	0	0	1	0	0	0
CL	9	46.9749	87912080	T/C	-2.09507	4.08e-08	17	0	0	0	0	0	0	0	0	0	0	1	0	0	1	0	0	0	0	0	0	0	0	1	0	1	0
SL	9	46.975	87912585	C/T	-3.72191	3.15e-11	7	1	0	0	0	0	0	0	0	0	0	1	0	0	1	0	1	0	1	0	1	0	1	1	0	1	0
SL	9	48.32	94237905	G/A	-6.29984	1.27e-26	30	0	0	0	0	0	0	1	0	0	0	1	0	0	1	0	1	0	0	0	0	0	1	1	1	0	0
SL	9	48.3205	94239494	C/A	-6.42121	1.16e-28	7	0	0	0	0	0	0	1	0	0	0	1	0	0	1	0	1	0	0	0	0	0	1	1	1	0	0
TL	9	48.3365	94293993	C/G	-4.46735	1.74e-12	15	0	0	0	1	0	0	1	1	0	0	1	0	0	1	0	1	0	0	0	0	0	1	1	1	0	0
TL	9	48.3365	94294032	T/G	-3.89596	7.48e-10	9	0	0	0	1	0	0	1	1	0	0	1	0	0	1	0	1	0	0	0	0	0	1	1	1	0	0
TL	9	48.3767	94430249	T/G	-4.44746	2.84e-15	30	0	0	0	1	0	0	0	1	0	1	1	0	1	1	0	1	0	1	1	0	0	1	1	1	0	0
BN	9	48.5422	94992280	GCGGC/-----	0.319662	2.45e-16	24	1	0	1	1	1	1	0	0	0	1	1	0	0	1	0	0	0	0	0	0	0	1	1	1	0	1
BN	9	48.5573	95043467	T/C	0.299977	6.5e-22	6	1	1	1	1	1	1	0	1	1	1	1	1	1	1	0	1	0	1	1	1	1	1	1	1	0	1
ERN	9	48.758	95724857	T/A	-0.216245	1.85e-11	25	0	0	0	0	1	0	1	0	0	0	0	0	0	0	1	0	1	0	0	0	1	0	0	0	0	0
SL	9	49.263	97545021	G/A	-2.66407	7.97e-13	7	1	0	0	1	1	0	1	1	1	1	1	0	1	1	1	1	1	1	1	1	0	1	1	1	1	1
SL	9	49.5819	98709135	C/T	-4.56781	2.11e-11	5	0	0	0	0	0	0	0	0	0	1	1	0	0	1	0	0	0	1	0	0	0	1	0	0	0	0
CD	9	50.8858	101987544	---/TCT	-0.368915	6.62e-13	63	0	0	0	0	0	0	1	0	0	0	0	1	0	0	0	0	1	0	0	0	0	0	0	1	0	0
BN	9	50.9419	102128669	G/A	0.261249	2.97e-15	13	1	1	1	1	1	1	0	1	1	1	1	1	1	1	0	1	1	1	1	0	0	0	0	0	1	1
BN	9	51.0774	102469327	C/A	0.328876	2.04e-24	14	1	1	1	1	1	1	1	1	1	1	1	1	1	1	0	0	1	1	1	0	0	1	0	1	1	1
CD	9	51.7958	104275731	A/G	0.454792	7.14e-10	9	0	0	0	0	0	0	0	0	0	0	0	0	0	0	1	0	0	0	0	0	0	0	0	0	1	0
TL	9	51.8368	104378698	C/A	-5.76804	1.36e-15	7	1	0	0	0	0	0	0	0	0	0	1	0	0	1	0	0	0	0	0	0	0	1	1	1	0	0
CD	9	52.0021	104756340	G/T	0.609717	9.62e-10	17	0	0	0	0	0	0	0	0	0	0	0	0	0	0	0	0	0	0	0	0	0	0	0	0	1	0
CD	9	52.0022	104756381	--/TG	0.638978	3.35e-10	5	0	0	0	0	0	0	0	0	0	0	0	0	0	0	0	0	0	0	0	0	0	0	0	0	1	0
CD	9	52.2125	105206659	------/TGACAC	0.369659	2.42e-07	6	0	0	1	0	0	0	0	0	0	0	0	0	0	0	0	0	0	0	0	0	0	0	0	0	1	0
ERN	9	52.235	105254789	G/A	-0.15739	2.35e-09	6	0	0	0	1	0	1	1	0	0	0	0	0	0	0	1	0	1	1	0	0	0	1	0	0	0	1
BN	9	53.9417	109728520	A/G	0.223	1.95e-14	8	1	1	1	1	1	1	1	1	1	1	1	1	1	1	0	1	1	1	1	1	1	1	0	1	0	1
CL	9	54.212	110095454	T/A	-4.39434	9.98e-09	10	0	0	0	0	0	0	0	0	0	0	1	0	0	0	0	0	0	0	0	0	0	0	0	0	0	0
CL	9	54.4587	110311225	G/A	-2.57523	7.91e-09	11	0	0	0	0	0	0	0	0	0	0	1	0	0	0	0	0	0	0	0	0	0	1	0	0	1	0
CL	9	55.1309	111464984	G/A	-3.14187	9.39e-09	5	0	0	0	0	0	0	0	0	0	0	1	0	0	0	0	0	1	0	0	0	0	0	0	0	0	0
ERN	9	55.6802	112666700	G/C	-0.120652	1.25e-08	8	0	1	1	1	1	1	1	1	0	0	0	0	1	0	1	0	0	1	0	1	1	0	1	1	0	1
BZ	9	55.703	112716628	T/C	5.66924	2.06e-15	8	0	0	0	0	0	0	0	0	0	1	0	0	0	0	0	0	0	1	0	0	0	0	0	0	0	0
BZ	9	55.7731	112869845	ACT/---	1.78601	2.42e-10	6	1	1	1	1	1	0	0	1	1	1	0	1	1	0	0	1	0	1	0	1	0	0	1	1	0	1
BZ	9	56.7849	115161865	G/T	2.82948	1.3e-12	8	0	1	0	0	0	0	0	0	0	1	0	0	0	0	0	0	0	1	0	1	0	0	1	0	0	1
ERN	9	56.8528	115372965	A/C	-0.108984	1.26e-07	8	0	1	1	1	0	1	1	1	0	0	0	0	0	0	1	1	1	1	0	1	1	1	1	0	0	1
BZ	9	57.3544	116914282	G/A	2.11448	6.53e-09	7	0	1	0	0	1	0	0	0	0	1	0	0	0	0	0	0	0	1	1	0	1	0	0	0	0	1
BZ	9	57.3548	116915130	G/A	2.35904	4.49e-09	11	0	0	0	0	1	0	0	0	0	1	0	0	0	0	0	0	0	1	1	0	1	0	0	0	0	1
CL	9	57.848	118107779	C/T	1.2274	3.02e-09	22	0	1	1	1	1	1	1	1	1	1	0	0	1	0	1	1	0	0	0	0	1	0	0	1	0	1
CL	9	57.9526	118275432	C/A	1.72667	3.49e-09	5	0	1	1	1	0	0	1	0	1	0	0	0	0	0	0	0	0	0	0	0	1	0	0	0	0	1
BZ	9	58.2218	118686457	TTG/---	3.46267	5.46e-10	17	0	0	0	0	0	0	0	0	0	0	0	0	0	0	0	0	0	1	0	0	0	0	0	1	0	1
CL	9	58.9298	119703290	G/T	1.59386	1.18e-16	5	1	1	1	1	1	1	1	1	1	1	0	1	1	1	1	1	0	1	0	1	1	0	1	1	0	1
BZ	9	59.3638	120326599	G/A	2.3877	5.1e-17	72	0	0	1	0	0	1	0	1	1	1	1	1	1	0	1	0	1	1	0	1	0	0	0	0	0	1
TL	9	60.6373	122155651	G/C	5.26461	1.62e-11	11	0	0	0	0	0	1	0	0	0	1	0	0	1	0	0	0	1	1	0	0	0	0	0	0	0	0
CD	9	61.1602	122906544	A/G	0.197468	5.96e-08	6	0	1	0	0	1	1	0	0	1	0	1	1	0	0	1	1	0	0	0	0	0	1	0	0	0	0
BN	9	61.1906	122950218	G/C	0.19289	1.62e-08	28	1	1	1	0	1	1	1	1	1	1	1	1	0	1	0	0	1	1	1	1	1	1	1	0	0	1
TL	9	61.1907	122950342	T/C	3.5223	3.84e-11	9	0	0	1	0	1	1	0	1	1	0	0	0	0	0	0	0	1	1	0	1	0	0	0	1	1	1
TL	9	62.2794	124842263	C/A	3.01526	6.41e-12	8	1	1	1	1	1	1	1	0	1	1	1	1	1	1	1	1	1	1	0	1	0	0	1	1	1	0
CD	9	62.8709	126503048	G/A	0.188524	1.57e-09	5	0	0	0	0	1	0	1	0	1	1	1	1	0	0	1	1	0	0	0	0	0	1	0	1	1	0
CL	9	63.0049	127090781	G/A	-4.32154	2.2e-08	5	0	0	0	0	0	0	0	0	0	0	1	0	0	0	0	0	0	0	0	0	0	0	0	0	0	0
TL	9	63.0358	127239789	T/C	3.19219	1.71e-11	5	0	1	1	1	1	1	1	0	1	1	0	0	1	0	0	1	0	1	0	1	0	1	0	1	0	0
TL	9	63.0393	127256773	T/A	4.41749	1.38e-10	12	0	1	0	0	0	1	0	0	1	1	0	0	0	0	0	0	1	1	0	0	0	0	0	0	0	0
TL	9	63.1034	127566263	C/T	4.44578	9.44e-09	9	0	0	0	0	0	0	0	0	0	1	0	0	0	0	0	1	1	0	0	0	0	0	0	1	1	0
CL	9	63.86	128977951	C/T	-3.58781	1.17e-10	5	0	0	0	0	1	0	0	0	0	0	1	0	0	0	0	0	0	0	0	0	0	0	0	0	0	0
CD	9	64.7814	129740224	G/A	0.22764	1.91e-09	11	0	0	1	0	0	0	0	0	1	0	0	1	0	0	1	1	0	1	0	0	0	0	0	0	1	0
BN	9	65.4482	130558020	C/G	0.2574	8.3e-08	5	0	1	1	0	0	1	0	0	0	0	1	0	1	1	0	0	0	0	1	0	0	0	0	0	0	1
BN	9	65.4562	130608589	G/A	0.264255	3.18e-13	40	0	1	1	0	0	1	0	1	0	1	1	0	1	1	0	0	0	0	1	0	1	1	1	0	0	1
BN	9	65.4563	130609190	G/A	0.272035	1.45e-12	14	0	1	1	0	0	1	0	1	0	1	1	0	1	1	0	0	0	0	1	0	1	1	1	0	0	1
BN	9	65.4568	130612862	C/A	0.224713	5.81e-16	25	1	1	1	1	1	1	1	1	1	1	1	1	1	1	1	1	1	1	1	1	1	1	1	1	0	1
ERN	9	70.7088	134290201	AAT/---	-0.198234	2.49e-19	6	0	0	1	0	1	1	1	1	0	0	0	0	0	0	1	1	0	1	1	1	0	0	1	0	0	1
ERN	9	70.7091	134290408	-------/GCAATAT	-0.190026	3.28e-19	6	0	1	1	0	1	1	1	1	0	0	0	0	0	1	1	1	0	0	1	1	0	1	1	0	0	1
CL	9	71.0091	134482828	C/T	1.42248	3.79e-11	49	1	1	1	1	0	1	1	0	1	1	0	0	0	0	1	1	0	1	1	0	0	0	0	1	0	1
ERN	9	72.654	135538054	C/G	-0.191799	9.52e-22	56	1	1	1	0	1	1	1	0	0	0	0	1	0	1	1	1	1	1	0	1	1	0	1	0	0	1
ERN	9	72.6894	135560787	AGG/---	-0.169097	8.41e-15	5	1	1	1	1	0	0	1	0	0	0	0	1	0	1	1	0	1	1	0	1	0	0	1	0	0	1
CD	9	73.334	135974293	C/T	0.261554	7.82e-10	14	0	0	0	0	0	0	0	0	1	1	1	0	0	0	0	1	0	0	0	0	0	1	0	0	1	0
CD	9	73.3343	135974500	G/C	0.246609	4.98e-09	32	0	0	0	0	0	0	0	0	1	1	1	0	0	0	0	1	0	0	0	0	0	1	0	0	1	0
TL	9	78.7076	138309419	G/A	3.73106	1.27e-17	33	0	1	1	1	1	1	1	0	1	1	1	1	1	1	0	1	1	1	1	0	0	1	0	1	1	1
BZ	9	79.9108	138766284	T/C	2.10989	1.64e-17	98	1	1	1	0	1	1	1	0	1	1	1	1	1	1	0	1	1	1	0	0	0	1	1	1	1	0
CL	9	79.9196	138769601	T/C	1.17409	6.67e-08	13	1	1	1	1	0	1	1	1	1	0	1	0	0	0	1	0	1	0	1	0	0	0	1	1	1	1
CD	9	79.9605	138785138	A/G	0.155564	3.48e-07	5	1	0	1	1	0	0	0	0	1	1	1	1	1	1	0	1	0	1	0	0	0	1	0	1	1	0
CL	9	82.7722	139852755	T/C	1.2349	4.42e-08	8	1	1	1	1	0	1	1	0	1	0	0	0	0	1	1	1	0	1	0	1	0	0	0	1	0	1
SL	9	83.9005	140281177	C/T	2.97874	7.7e-07	8	0	1	1	1	0	0	0	0	0	0	0	0	0	0	0	1	1	1	0	0	0	0	0	0	0	0
TL	9	86.7259	141666434	G/C	3.19005	1.72e-18	49	1	1	1	1	1	1	1	0	1	1	1	1	0	1	1	1	1	1	1	0	1	0	1	1	1	1
TL	9	86.7295	141668831	A/G	3.42506	3.05e-20	5	1	1	1	1	1	1	1	0	1	1	1	1	0	1	1	1	1	1	1	0	1	0	1	1	1	0
ERN	9	88.1351	142346038	C/T	0.175178	5.39e-09	16	0	0	0	0	1	1	1	0	0	1	0	0	0	1	0	1	0	0	0	0	0	0	0	0	0	0
ERN	9	88.1359	142346301	A/C	0.106494	1.27e-09	6	0	0	1	1	1	1	1	0	1	1	1	1	1	1	0	1	1	1	0	1	1	0	1	1	1	1
ERN	9	88.2978	142398043	C/A	0.148372	5.12e-10	34	0	0	0	0	1	1	0	0	1	1	0	1	0	0	0	1	0	1	0	1	1	0	0	0	0	1
ERN	9	89.714	143054893	G/A	0.287475	7.94e-09	5	0	0	0	0	0	0	0	0	0	1	0	0	1	0	0	0	0	0	0	0	0	0	0	0	0	0
ERN	9	89.7927	143081506	T/G	0.228743	2.18e-08	12	0	0	0	0	1	0	0	0	0	1	0	0	0	0	0	0	0	0	0	1	0	0	0	0	0	0
CD	9	93.7341	144799665	A/G	0.151621	4.6e-09	5	1	0	0	1	0	1	0	0	0	1	1	0	1	1	0	0	1	1	1	1	1	1	0	0	1	0
CD	9	96.6014	145848662	--/TA	-0.362498	4.58e-07	8	0	1	0	0	0	0	1	0	0	0	0	0	0	0	0	0	0	0	0	0	0	0	0	0	0	0
CD	9	99.6026	146779265	G/A	0.198184	5.03e-09	65	1	0	0	1	0	0	0	0	1	1	0	0	0	0	0	0	0	1	1	0	1	1	0	0	1	0
CD	9	99.6109	146781084	G/C	0.207754	6.51e-08	6	1	0	0	1	0	0	0	0	0	1	0	0	0	0	0	0	0	1	0	0	1	1	0	0	1	0
CD	9	102.522	147314975	G/C	-0.223665	4.89e-07	15	0	1	0	0	1	0	1	0	0	0	0	0	0	0	1	0	0	0	0	0	0	0	0	0	0	1
BZ	9	102.529	147315962	G/C	2.51166	1.87e-15	50	0	0	1	0	0	0	1	0	0	1	1	0	0	0	1	0	0	1	1	0	0	1	0	0	1	0
BZ	9	102.53	147316076	C/A	1.84242	1.05e-16	22	0	1	1	1	1	0	1	1	1	1	1	0	1	1	1	0	0	1	1	1	0	1	1	0	1	1
BZ	9	102.885	147365499	-----/CACCT	1.80394	2.48e-16	6	1	1	1	1	1	0	1	0	0	1	1	1	1	0	1	0	0	1	1	1	1	1	0	1	1	1
BN	9	103.267	147451936	G/A	0.272776	7.53e-15	5	0	0	1	1	0	0	1	1	0	0	0	0	0	0	1	0	0	1	1	0	0	1	1	1	1	1
BZ	9	103.28	147455510	C/G	1.93139	8.39e-15	10	0	1	1	1	0	0	1	0	0	0	1	1	1	1	1	0	0	1	1	0	1	1	1	0	1	0
BZ	9	103.283	147456156	T/C	1.76752	4.72e-14	5	0	1	1	1	0	1	1	0	0	1	1	1	1	1	1	0	0	1	1	0	0	1	1	1	1	0
BN	9	105.774	148113986	A/T	0.234114	2.93e-17	6	0	1	1	1	1	1	1	0	0	1	1	0	1	1	1	1	0	1	1	1	1	1	1	1	1	0
BN	9	107.122	148469696	---/TGG	0.233874	1.13e-16	14	0	1	1	0	0	0	1	0	1	0	1	1	1	1	1	1	0	1	1	1	1	1	1	1	1	1
BN	9	108.038	149339229	T/G	0.27513	1.67e-17	56	0	1	1	0	1	0	1	1	0	0	0	0	1	0	1	1	0	1	1	0	1	1	1	1	1	0
CD	9	108.191	149559028	G/C	-0.314758	2.2e-07	6	0	1	0	0	0	0	0	0	0	0	0	0	0	0	1	0	0	0	0	0	0	0	0	0	0	1
TL	10	8.19351	4052362	A/T	3.37891	8.08e-11	14	0	1	1	1	0	0	1	1	0	0	0	0	0	0	0	1	0	0	1	1	0	1	0	0	1	1
SL	10	14.646	5037318	G/A	3.00807	3.72e-07	11	0	1	0	0	0	0	0	1	0	1	1	0	0	0	1	0	0	0	0	0	0	0	0	0	1	1
TL	10	14.646	5037318	G/A	4.65543	2.02e-11	64	0	1	0	0	0	0	0	1	0	1	1	0	0	0	1	0	0	0	0	0	0	0	0	0	1	1
TL	10	18.1093	5596838	--/GG	-5.73301	3.72e-08	6	0	0	0	1	0	0	0	0	0	0	0	0	1	0	0	0	0	0	0	0	0	0	0	1	0	0
TL	10	18.1138	5597583	G/C	3.55	1.94e-09	6	0	1	0	0	0	0	1	0	0	1	0	1	0	1	0	1	0	0	1	0	0	1	1	0	0	1
CL	10	27.8563	10173507	T/A	-1.12527	6.37e-08	8	1	1	1	0	0	1	0	1	1	1	1	1	1	0	1	0	1	1	0	1	1	0	0	0	1	1
TL	10	28.372	10381342	G/T	6.98574	3.03e-09	5	0	0	0	0	0	0	0	0	0	0	0	0	0	0	0	0	0	0	0	0	0	0	0	0	1	1
BN	10	28.7289	10717942	T/G	-0.229783	1.26e-14	9	0	1	1	0	1	1	1	1	0	1	1	1	1	0	0	1	1	0	1	1	1	0	0	1	1	1
BN	10	29.8906	12164732	A/C	-0.355899	1.3e-15	11	0	1	0	0	1	0	0	1	1	1	0	0	1	0	0	0	0	0	0	1	1	0	0	0	0	1
CL	10	31.3494	13835070	T/A	-1.27001	3.51e-11	5	1	1	1	1	1	1	0	1	1	1	0	1	1	1	1	1	1	1	1	1	1	1	1	0	0	1
CD	10	31.5958	14038686	G/C	0.233852	5.45e-11	29	0	1	0	1	1	0	0	0	0	0	1	0	0	0	1	1	0	0	0	0	0	0	0	1	1	0
CL	10	31.7218	14142828	T/G	-1.21499	7e-10	7	0	1	1	1	0	1	1	1	1	1	1	1	1	0	1	0	1	1	1	1	1	1	1	0	1	1
CL	10	31.7219	14142887	A/G	-1.22367	1.96e-10	17	0	1	1	1	0	1	1	1	1	1	1	1	1	0	1	1	1	1	1	1	1	1	1	0	1	1
CL	10	31.9877	14362528	G/C	-1.67916	1.68e-10	8	0	1	0	0	0	0	0	1	0	0	1	0	1	0	0	0	0	1	1	1	0	1	1	0	0	0
BN	10	31.9881	14362909	T/A	-0.278888	7.63e-12	12	0	1	0	1	0	1	0	0	0	1	0	0	1	0	1	1	1	0	0	1	1	0	0	0	0	0
BN	10	32.1549	14500765	G/A	-0.269927	1.32e-13	7	0	0	0	1	1	0	0	0	0	1	0	0	1	1	1	0	1	0	0	1	1	0	0	1	1	1
BN	10	32.3948	14698976	A/G	-0.380534	3.45e-12	16	0	0	0	0	0	0	0	0	0	1	0	1	1	0	1	0	0	0	0	0	0	0	0	0	0	1
BN	10	32.3986	14702183	G/T	-0.440951	8.15e-09	6	0	0	0	0	0	0	0	0	0	1	0	1	0	0	0	0	0	0	0	0	1	0	0	0	0	0
ERN	10	32.4479	14786317	A/T	0.150117	6.07e-09	17	1	0	0	1	1	1	0	1	1	0	0	0	0	1	0	0	0	0	0	0	0	0	0	0	1	0
TL	10	32.4693	14823478	G/A	-4.55763	8.45e-10	9	0	0	0	0	1	0	0	0	0	0	1	0	1	0	0	0	0	1	0	0	0	0	1	0	0	0
CL	10	32.6092	15066163	G/A	-1.32529	5.7e-08	7	1	0	0	0	0	1	0	1	1	1	1	1	1	0	1	1	0	0	0	1	1	1	1	0	1	1
BN	10	33.8974	18873150	T/C	-0.241054	1.33e-14	14	1	1	1	0	1	0	1	1	0	1	1	0	1	0	1	0	1	0	1	1	1	1	1	1	1	1
TL	10	35.0259	23088966	A/G	4.7822	6.11e-10	5	0	0	1	0	0	0	0	0	0	1	0	0	0	0	0	0	1	0	0	0	0	0	0	0	1	1
ERN	10	35.6784	25514309	G/A	0.229672	2.33e-09	10	0	0	0	0	1	0	0	0	0	0	1	0	0	0	0	1	0	0	0	0	0	0	0	1	0	0
ERN	10	35.8157	26348649	-/T	0.139622	5.38e-10	15	1	0	0	0	1	0	0	1	1	0	0	1	0	0	1	1	0	1	1	0	0	1	0	0	1	0
TL	10	35.9457	29510418	--/AG	-3.33973	2.81e-10	12	0	0	0	1	0	1	0	1	0	0	1	0	1	0	0	0	0	1	0	0	1	1	1	1	0	0
TL	10	35.9482	29573029	ATTT/----	-2.95422	1.61e-09	44	0	1	0	1	1	1	0	1	0	0	1	0	1	0	0	0	0	1	0	0	1	1	1	1	0	0
ERN	10	36.188	44539241	-/T	-0.259484	3.21e-07	15	0	0	0	0	0	0	1	0	0	1	0	0	0	0	0	0	0	0	0	0	0	0	0	0	0	0
CL	10	36.2	45409528	A/G	-1.72488	1.63e-20	6	1	0	0	1	1	1	1	1	1	1	0	1	1	0	1	0	1	1	0	1	1	1	1	0	0	1
ERN	10	36.2454	47863042	G/A	-0.277503	9.74e-08	10	0	0	0	0	0	0	1	0	0	1	0	0	0	0	0	0	0	0	0	0	0	0	0	0	0	0
CL	10	36.513	61901637	T/A	-1.24703	2.11e-08	8	0	1	0	1	1	1	1	1	1	0	1	1	1	0	1	0	1	1	0	1	1	1	0	1	0	1
ERN	10	36.6684	65474867	A/G	0.194656	1.93e-08	7	1	0	0	0	0	0	0	0	1	0	1	0	0	0	0	0	0	0	1	0	0	0	0	1	0	0
CL	10	36.7191	66640353	T/C	-1.5419	1.16e-13	5	0	1	0	1	1	1	1	0	1	0	0	1	1	0	1	1	0	0	1	1	1	1	1	0	0	1
CD	10	36.8605	69888568	G/A	0.257111	8.9e-09	26	0	0	0	0	1	0	0	0	1	0	1	0	0	0	1	0	0	0	0	0	0	0	0	1	0	0
ERN	10	36.8665	70027316	G/A	0.438087	1.32e-18	11	0	0	0	0	0	0	0	0	0	0	1	0	0	0	0	0	0	0	0	0	0	0	0	1	0	0
CL	10	36.9003	70798654	--/AG	-1.95873	2.41e-18	9	0	1	0	0	1	1	1	1	1	0	0	1	1	0	1	1	0	0	0	1	1	0	1	0	0	0
ERN	10	37.0316	71315927	C/T	0.377817	2.18e-20	32	0	0	0	0	0	0	0	0	0	0	1	0	0	1	0	0	0	0	0	0	0	0	0	1	0	0
CL	10	37.0442	71365659	T/C	-1.52029	1.51e-09	5	0	0	0	1	1	1	1	1	1	0	0	1	1	0	1	1	0	0	0	1	1	0	1	0	0	1
ERN	10	37.3983	72760086	C/T	0.329915	2.15e-15	21	0	0	0	0	0	0	0	0	0	0	1	0	0	0	0	0	0	0	1	0	0	0	0	1	0	0
CL	10	37.8962	74720677	-/T	-1.82726	2.69e-11	40	0	0	0	0	1	1	1	0	1	0	0	1	1	0	1	0	0	0	0	1	1	0	0	0	0	1
CD	10	38.0917	75490601	-----/GACCA	-0.262342	9.86e-09	25	0	0	0	0	0	0	1	0	0	1	0	0	0	0	0	0	0	1	0	1	0	1	0	0	0	0
CD	10	38.6947	77903323	T/A	0.320486	2.51e-10	9	0	1	0	1	0	0	0	0	0	0	1	0	0	0	0	0	0	0	1	0	0	0	0	0	0	0
CD	10	39.9169	83207711	G/A	-0.259306	9.28e-09	10	0	0	0	0	0	1	1	0	0	0	0	0	0	0	0	0	0	1	0	1	0	0	1	0	0	0
CD	10	40.4316	85544229	C/T	0.370439	7.14e-14	7	0	1	0	0	0	0	0	0	0	0	1	0	0	0	1	1	0	0	0	0	0	0	0	0	0	0
CD	10	41.1083	87244853	C/T	0.28748	9.53e-09	11	1	1	0	0	0	0	0	0	0	0	1	0	0	0	0	0	0	0	1	0	0	0	0	0	0	0
CD	10	41.2081	87850259	C/T	0.505541	9.33e-13	7	0	1	0	0	0	0	0	0	0	0	1	0	0	0	0	0	0	0	0	0	0	0	0	0	0	0
BN	10	41.3326	88605283	C/A	0.305488	3.74e-08	5	0	0	0	0	0	0	1	0	1	0	0	1	0	0	0	1	0	1	0	0	0	0	0	0	0	0
BN	10	42.4022	95328610	-------/GGTGGGG	0.475624	2.39e-08	5	0	0	0	0	0	0	1	0	0	0	0	0	0	0	0	0	0	1	0	0	0	0	0	0	0	0
ERN	10	45.2352	112928964	G/C	-0.41305	3.82e-16	11	0	0	0	0	0	1	1	0	0	0	0	0	0	0	0	0	0	0	0	0	0	0	0	0	0	0
SL	10	45.3627	113315575	C/G	-3.75503	4.88e-18	9	0	1	0	0	1	1	0	1	1	0	0	0	0	0	0	0	0	1	0	0	0	1	1	1	1	1
BN	10	45.4074	113451182	G/A	0.314105	5.53e-18	40	1	0	0	0	1	0	1	1	0	0	1	0	0	1	0	0	1	1	1	0	0	1	1	1	1	1
SL	10	45.6003	114036441	C/A	-3.02534	3.37e-22	82	1	1	1	1	1	1	1	1	1	0	1	1	1	1	0	1	0	1	0	1	1	1	1	1	1	1
BN	10	45.7512	114494170	T/C	0.448001	3.92e-10	7	0	0	0	0	1	0	0	0	0	0	0	0	0	0	0	0	0	1	0	0	0	0	0	0	0	1
ERN	10	46.6703	117282418	A/T	0.195848	1.78e-06	6	0	0	0	0	0	0	0	0	0	0	1	0	1	0	0	1	0	0	0	0	0	0	0	0	0	0
BN	10	46.842	117704895	A/T	0.325834	5.52e-11	7	0	0	0	0	0	0	1	0	1	0	0	0	0	1	0	0	0	1	0	1	0	0	0	0	0	1
TL	10	46.851	117725925	G/A	-4.56162	3.54e-17	84	0	1	0	0	0	1	0	1	1	0	0	0	1	0	0	1	0	1	0	1	0	0	0	0	1	1
SL	10	47.1925	118721488	G/C	-3.61127	2.63e-17	7	0	1	0	1	1	1	0	1	1	0	0	0	0	0	0	0	0	1	0	1	0	1	0	1	1	0
TL	10	47.1925	118721488	G/C	-4.15147	8.13e-17	7	0	1	0	1	1	1	0	1	1	0	0	0	0	0	0	0	0	1	0	1	0	1	0	1	1	0
ERN	10	48.154	121974469	C/T	-0.420388	4.17e-17	7	0	0	0	1	0	0	1	0	0	0	0	0	0	0	0	0	0	0	0	0	0	0	0	0	0	0
BZ	10	48.6571	123555954	C/T	-1.56936	1.04e-08	15	1	1	0	0	1	1	0	0	1	0	0	0	1	0	1	1	0	0	0	1	0	1	1	0	0	0
ERN	10	48.7486	123843690	C/T	-0.378702	2.03e-14	5	0	0	0	1	0	0	1	0	0	0	0	0	0	0	0	0	0	0	0	0	0	0	0	0	0	0
CL	10	50.3077	126549720	C/G	-1.56599	4.27e-07	7	0	1	0	0	1	0	0	0	0	0	0	1	1	1	0	0	0	0	0	1	0	0	1	0	0	0
CD	10	50.3993	126703642	-------/GTTCTGT	-0.348268	1.08e-11	12	0	0	0	0	0	1	1	0	0	0	0	0	0	0	0	0	0	0	0	1	0	1	0	0	0	0
ERN	10	50.854	127468046	G/A	-0.399002	1.62e-14	11	0	0	0	0	0	1	1	0	0	0	0	0	0	0	0	0	0	0	0	0	0	0	0	0	0	0
ERN	10	56.0878	132249110	C/A	-0.242252	2.41e-09	5	0	0	0	0	0	1	0	0	0	0	0	0	0	1	1	0	1	0	0	0	0	0	0	0	0	0
CL	10	56.6664	132694460	C/T	-2.33555	4.31e-07	5	0	1	0	0	0	0	0	0	0	0	0	0	1	0	0	0	0	0	0	1	0	0	0	0	0	0
ERN	10	56.9209	132891165	----/CCCA	-0.328674	7.87e-14	39	0	0	0	1	0	1	1	0	0	0	0	0	0	0	0	0	0	0	0	0	0	0	0	0	0	0
ERN	10	57.0515	132992089	G/A	-0.18918	9.2e-10	5	0	1	0	1	0	0	0	0	0	0	0	0	0	1	1	0	1	1	0	0	0	0	1	0	0	0
ERN	10	57.4535	133302813	G/A	-0.28905	7.55e-11	5	0	0	0	1	0	1	1	0	0	0	0	0	0	0	0	0	0	0	0	0	0	0	0	0	0	0
CL	10	59.9793	134969130	G/A	2.94246	3.68e-13	69	0	0	1	0	0	0	0	0	0	0	0	0	0	1	0	1	0	0	0	0	0	0	0	0	1	0
CL	10	59.9829	134971267	G/A	2.78696	1.42e-11	6	0	0	1	0	0	0	0	0	0	0	0	0	0	1	0	1	0	0	0	0	0	0	0	0	1	0
CD	10	61.9457	136077198	A/T	-0.420827	9.96e-13	44	0	0	0	0	0	1	1	0	0	1	0	0	0	0	0	0	0	0	0	0	0	0	0	0	0	0
CD	10	61.9898	136096190	C/T	-0.329335	2.2e-17	9	1	0	0	0	0	1	1	0	1	0	0	1	0	0	1	0	0	0	1	1	0	0	0	0	0	0
ERN	10	62.3592	136255205	-/G	-0.29848	3.51e-11	7	0	0	0	0	0	0	1	0	0	0	0	0	0	1	0	0	1	0	0	0	0	0	0	0	0	0
BZ	10	62.4764	136305667	C/T	3.45697	1.68e-07	22	0	0	0	0	0	0	0	0	0	0	0	0	0	1	0	0	0	0	1	0	0	0	0	0	0	0
CD	10	62.898	136487170	----/TATA	-0.262824	1.1e-13	6	0	0	0	1	0	1	1	0	0	1	0	1	0	0	1	1	0	0	1	0	0	1	0	0	0	1
CD	10	63.6573	136794607	T/G	-0.274922	4.38e-12	24	1	0	0	0	0	1	1	0	1	1	0	0	0	0	0	0	0	0	0	1	0	1	0	0	0	0
BZ	10	64.3965	137091014	T/A	1.65593	2.79e-07	8	1	1	0	0	0	0	1	1	0	0	0	0	0	1	0	0	1	0	1	1	0	0	1	0	0	0
ERN	10	64.7017	137465362	G/A	-0.193748	3.6e-23	95	0	1	1	0	0	1	1	1	1	1	0	1	0	1	1	1	1	1	1	1	1	0	0	1	0	0
BZ	10	64.9045	137674864	T/C	2.80322	4.75e-19	100	0	0	0	1	0	0	1	0	0	0	0	1	0	0	0	0	1	1	0	1	0	0	0	0	1	1
BZ	10	64.9224	137682957	----/CGAA	3.32836	8.84e-08	10	0	0	0	0	0	0	0	0	0	0	0	0	0	1	0	0	0	0	1	0	0	0	0	0	0	0
CD	10	64.9967	137716546	G/A	-0.165212	1.38e-10	8	1	0	0	0	1	0	0	1	0	0	0	1	0	1	1	1	0	1	1	1	1	1	1	1	1	1
BN	10	66.2904	138301433	G/A	0.213908	4.63e-09	6	1	0	1	0	0	0	1	1	0	0	0	1	1	1	0	1	0	1	0	1	0	0	1	1	1	0
BN	10	66.443	138370430	C/T	-0.465661	1.2e-07	11	0	1	0	0	0	0	0	0	0	0	0	0	0	0	0	0	0	0	0	0	0	1	0	0	0	0
ERN	10	67.6814	138930309	A/G	0.176591	1.75e-07	6	0	1	1	1	0	1	0	0	0	1	1	0	0	0	0	0	0	0	0	0	0	0	0	1	0	0
CL	10	67.6834	138931213	T/A	1.96412	1.75e-13	12	1	0	0	0	0	0	0	0	1	0	0	0	0	1	0	1	1	0	1	0	0	1	1	0	1	0
CL	10	67.6836	138931305	G/C	1.70637	2.31e-07	10	1	0	0	0	0	0	0	0	0	0	0	0	0	0	0	0	1	0	1	0	0	1	1	0	1	0
BN	10	68.6563	139371048	T/C	0.247024	6.18e-09	5	1	0	0	1	0	0	0	0	0	0	0	1	0	1	0	0	1	1	0	1	0	0	1	0	1	0
BN	10	68.9151	139488056	A/G	-0.318776	1.99e-08	6	0	1	1	0	1	0	1	1	1	1	1	1	1	1	1	1	1	1	1	1	0	1	1	1	1	1
BN	10	68.9755	139515385	C/T	0.433515	1.63e-13	9	1	0	1	1	1	0	1	1	1	1	1	1	1	1	0	1	1	1	1	1	0	0	1	1	1	1
SL	10	69.7322	139807122	A/G	2.10283	2.29e-08	9	1	1	0	1	0	0	1	0	0	1	0	1	1	1	1	0	1	0	1	0	1	1	1	1	0	1
BN	10	71.6449	140490825	C/G	0.279671	6.18e-16	12	1	0	0	1	1	1	1	1	0	0	0	1	1	1	0	1	0	1	1	1	1	0	1	0	0	1
CD	10	71.8814	140575362	A/G	-0.177064	1.75e-09	8	1	0	1	0	1	1	0	1	0	1	0	0	0	1	1	1	0	1	1	0	0	0	1	1	0	1
BN	10	71.8962	140580658	--/TC	0.363974	1.38e-12	31	1	0	0	0	0	0	0	1	0	0	0	1	0	0	0	0	0	0	1	0	0	0	1	1	0	0
CD	10	71.9237	140590472	G/T	0.222018	9.46e-08	6	0	0	0	1	0	0	0	0	0	0	1	0	1	0	0	0	1	1	0	1	1	0	0	0	1	0
BN	10	72.0716	140643371	G/C	0.269463	2.05e-12	12	1	0	0	1	1	1	0	1	0	0	0	1	0	0	0	1	0	0	1	1	1	0	1	0	0	1
CD	10	72.7635	140890676	C/T	-0.294466	2.63e-10	21	0	0	0	0	0	1	0	0	0	0	0	1	0	1	1	0	0	0	1	0	0	0	0	0	0	0
CD	10	72.8167	140909695	A/C	-0.346055	1.57e-08	9	0	0	0	0	0	0	0	0	0	0	0	0	0	1	1	0	0	0	1	0	0	0	0	0	0	0
TL	10	72.8317	140915054	G/T	2.52043	2.27e-07	5	1	1	0	0	1	0	1	0	0	1	0	1	0	1	1	0	1	0	1	1	0	1	1	0	0	0
TL	10	73.5413	141168704	T/C	2.95089	3.14e-07	12	0	0	0	1	0	1	1	0	0	0	0	1	1	1	0	0	1	0	0	0	0	0	0	0	1	1
ERN	10	75.3264	141806805	A/G	-0.124749	4.44e-09	41	1	1	0	1	0	1	0	0	1	1	0	0	0	1	1	0	1	0	1	0	0	1	1	1	0	0
BN	10	76.3341	142081605	G/A	0.313608	7.13e-10	10	1	0	1	0	0	0	0	1	0	0	0	1	0	0	0	0	0	0	1	0	0	0	1	0	0	0
ERN	10	77.6736	142437949	G/C	-0.256138	2.71e-08	6	0	0	0	0	0	0	0	0	1	0	0	0	0	0	0	0	1	0	1	0	0	0	0	0	0	0
CL	10	77.8795	142492715	A/-	1.33758	1.21e-07	6	1	0	0	0	0	0	1	0	0	0	1	0	0	1	0	1	1	0	0	0	1	1	1	0	1	1
ERN	10	79.7249	142983634	C/G	-0.14223	1.28e-06	5	0	1	0	0	0	1	0	1	1	0	0	0	0	0	0	0	1	0	1	0	0	0	0	1	0	0
SL	10	80.8964	143347973	T/C	2.10483	1.33e-07	10	1	0	0	0	1	0	1	0	0	1	0	1	1	0	1	0	1	1	0	1	1	1	1	0	0	0
BN	10	82.7742	144417854	-------/GGGTTTA	-0.161464	7.8e-08	5	0	1	0	0	1	1	1	0	1	1	1	1	1	1	1	1	1	0	0	1	1	1	1	1	0	1
SL	10	84.3457	144836889	G/A	1.95292	2.01e-07	6	1	0	1	1	1	0	1	0	1	0	1	1	1	0	0	0	1	1	0	1	1	1	0	0	0	1
CL	10	84.3593	144840296	-------/AATTTGG	1.45645	3.28e-08	20	1	0	0	0	1	0	1	0	1	0	1	0	0	0	0	0	1	0	0	0	0	1	0	0	1	1
SL	10	84.3594	144840324	A/C	2.39558	2.94e-07	6	1	0	0	0	1	0	1	0	1	0	1	0	0	0	0	0	1	0	0	0	1	1	0	0	1	1
CL	10	84.3617	144840905	-----/ATGCC	1.39274	3.4e-08	8	1	0	0	0	0	0	1	0	1	0	1	1	0	0	0	0	1	1	0	0	0	1	0	0	1	1
TL	10	84.6345	144909259	A/C	2.1379	3.98e-07	7	0	0	1	0	1	0	1	0	1	0	0	1	1	1	1	1	1	0	1	1	1	1	1	0	1	0
CD	10	91.6096	146627247	C/T	-0.276301	1.06e-06	10	0	0	0	0	0	0	0	0	0	0	0	0	0	0	1	0	0	1	0	0	0	0	0	1	0	0
